# Supplementary material
Source: Research Square preprint supplement (doi:10.21203/rs.3.rs-8836038/v1)
Supplement: Supplementary file 1 [file cac3dea7d77cc7f56f676ddf.docx]

**Supplementary Information**

**Multi-omic Longitudinal Profiling Reveals Coordinated Gut Microbiota, Metabolomics, and Host Proteomics Signatures Predictive of Antidepressant Response in Drug-Naïve Depression**


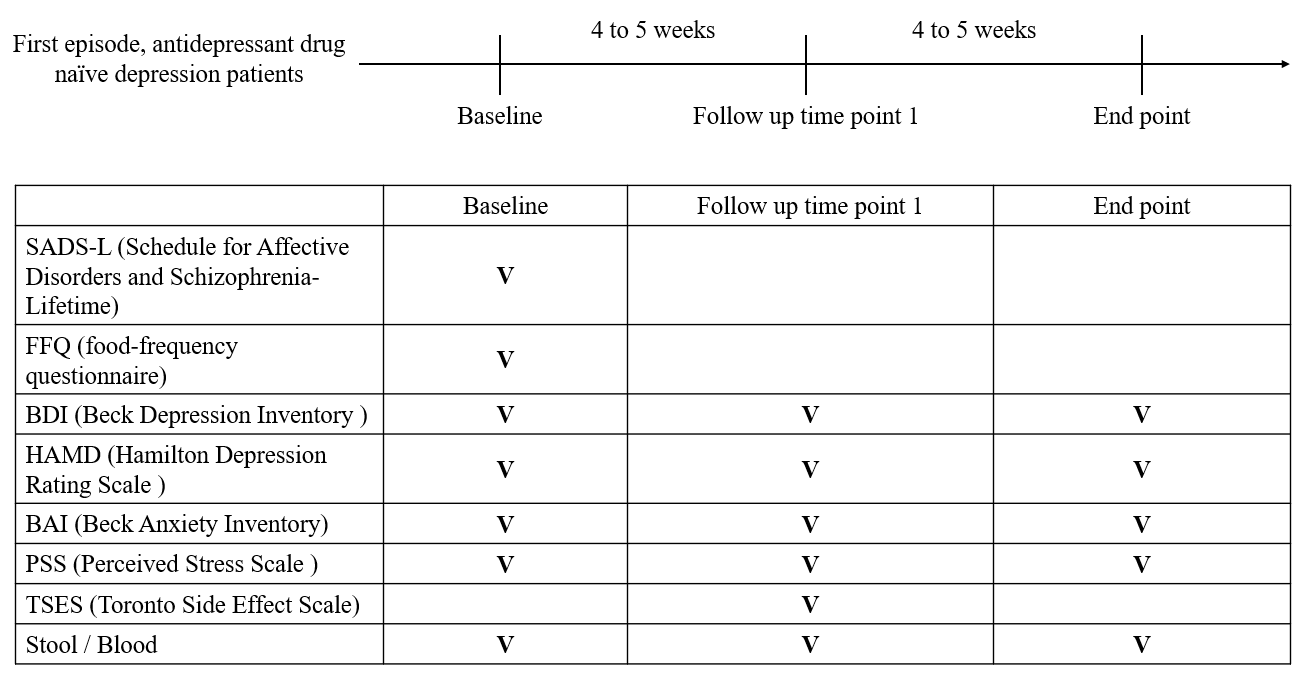


|  | Baseline | Follow up time point 1 | End point |
| --- | --- | --- | --- |
| SADS-L (Schedual for Affective Disorder and Schizophrenia) | **V** |  |  |
| FFQ (Food-Frequency Questionnaire | **V** |  |  |
| HAMD (Hamilton Depression Rating Scale) | **V** | **V** | **V** |
| Stool / Blood | **V** | **V** | **V** |

# Figure S1. Subjects’ longitudinal follow-up and data collection workflow

| **A**  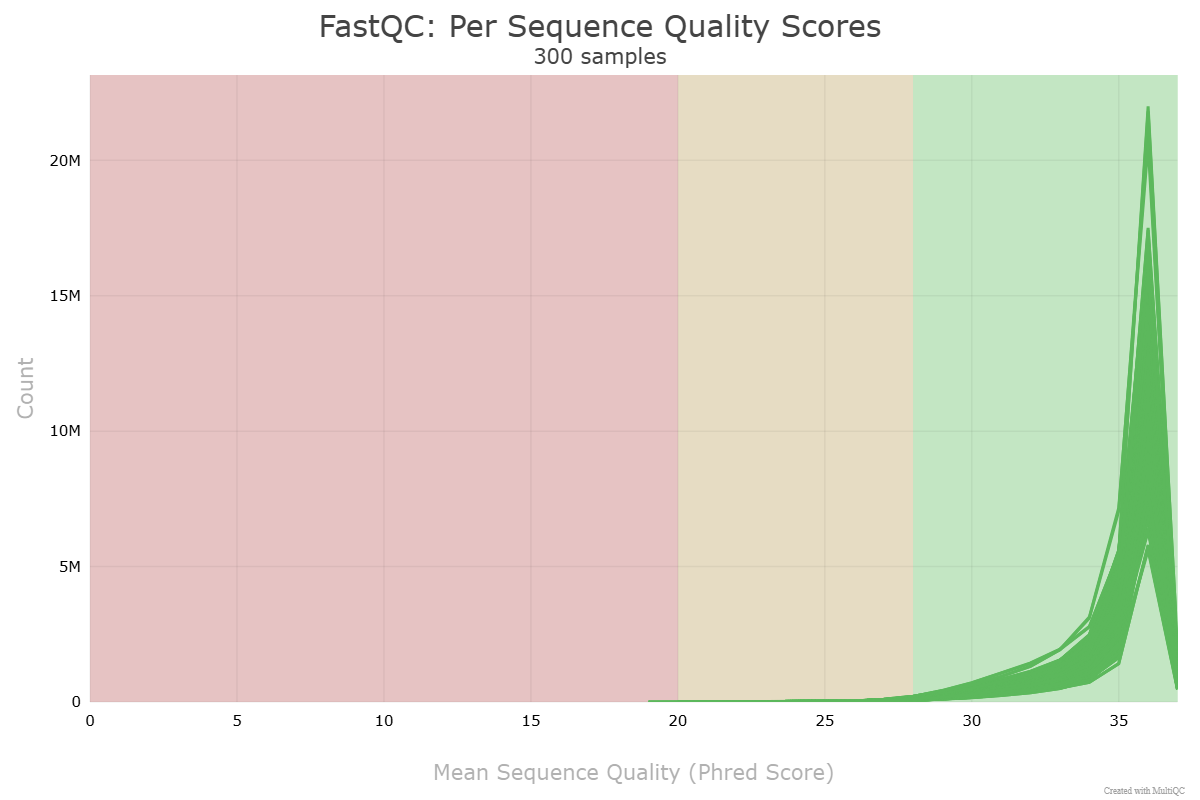 |
| --- |
| **B**  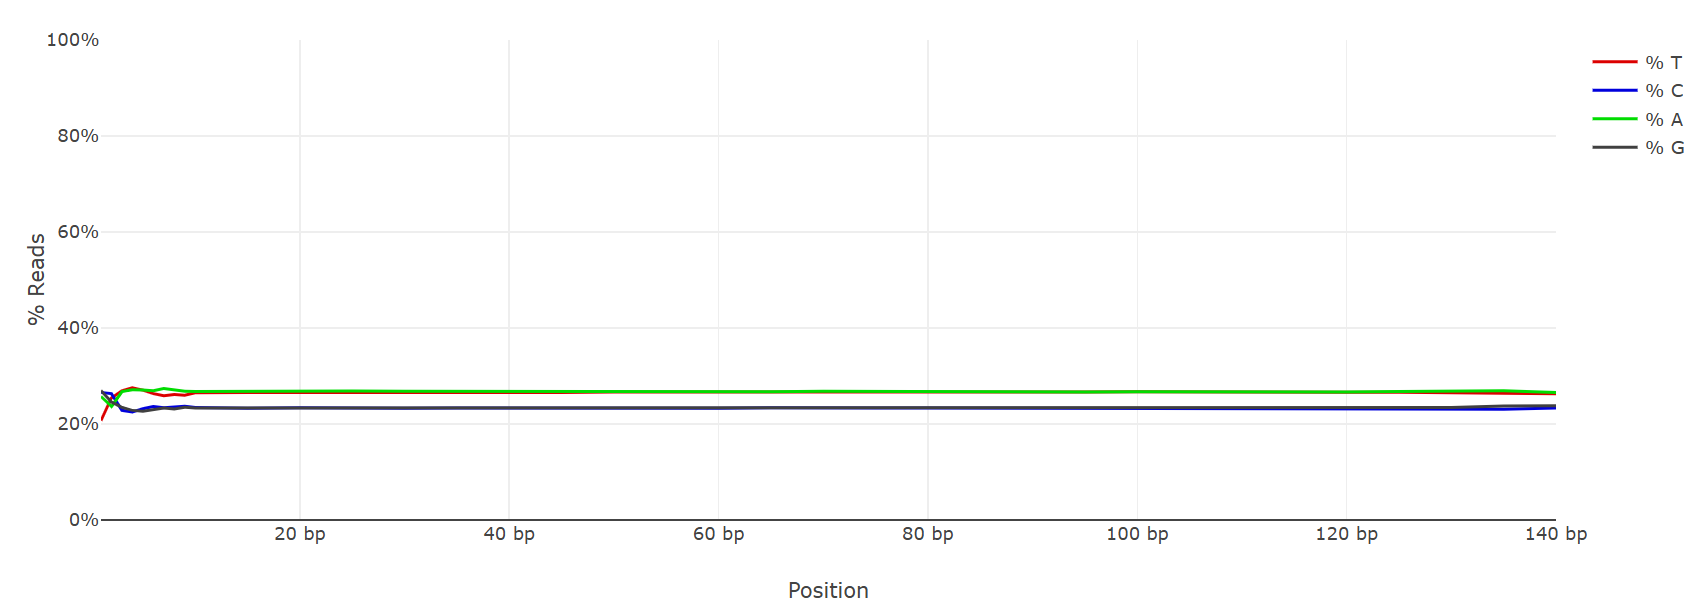 |
| **C**  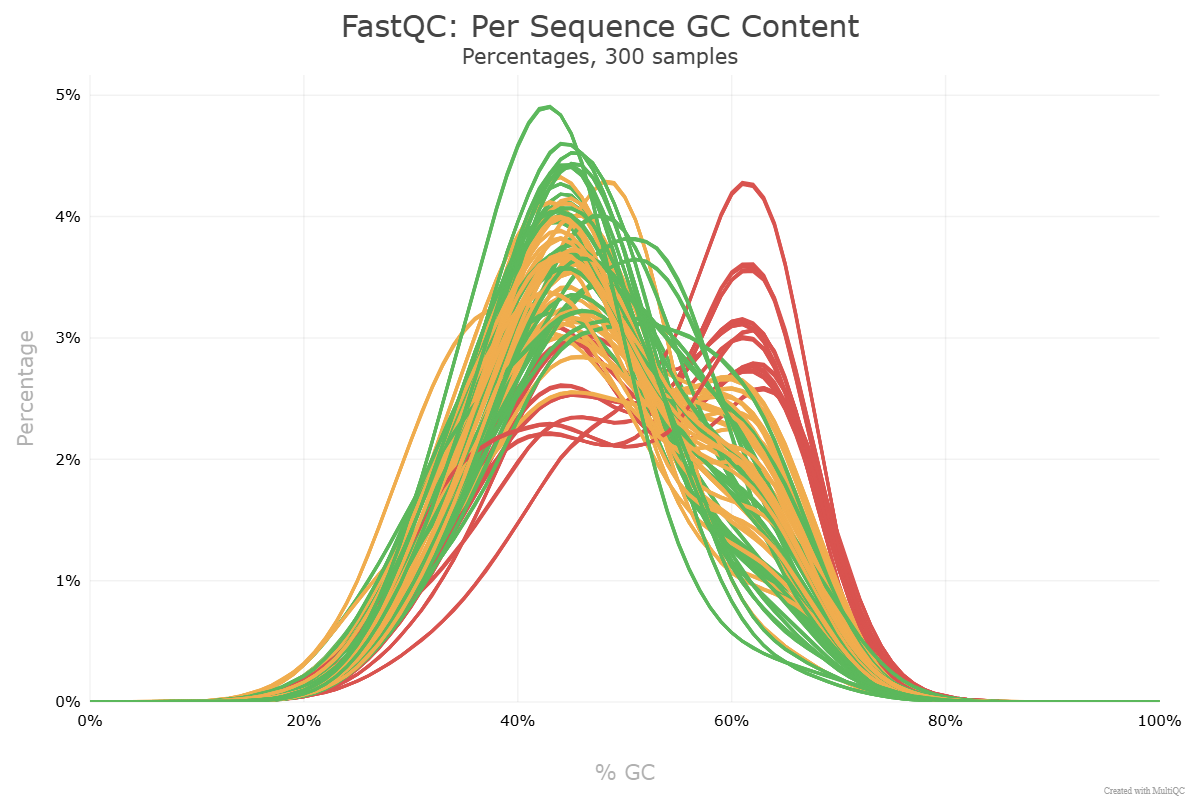 |

# Figure S2. Quality assessment of shotgun metagenomic sequencing reads. (A) Distribution of per-sequence quality scores across 300 samples, showing that the majority of reads have Phred scores >30, indicating high sequencing accuracy. (B) Per-base sequence content plot demonstrating uniform nucleotide composition along read positions, suggesting minimal sequencing bias. (C) Per-sequence GC content distribution across samples, showing expected bimodal GC patterns consistent with gut microbial communities.

| **A**  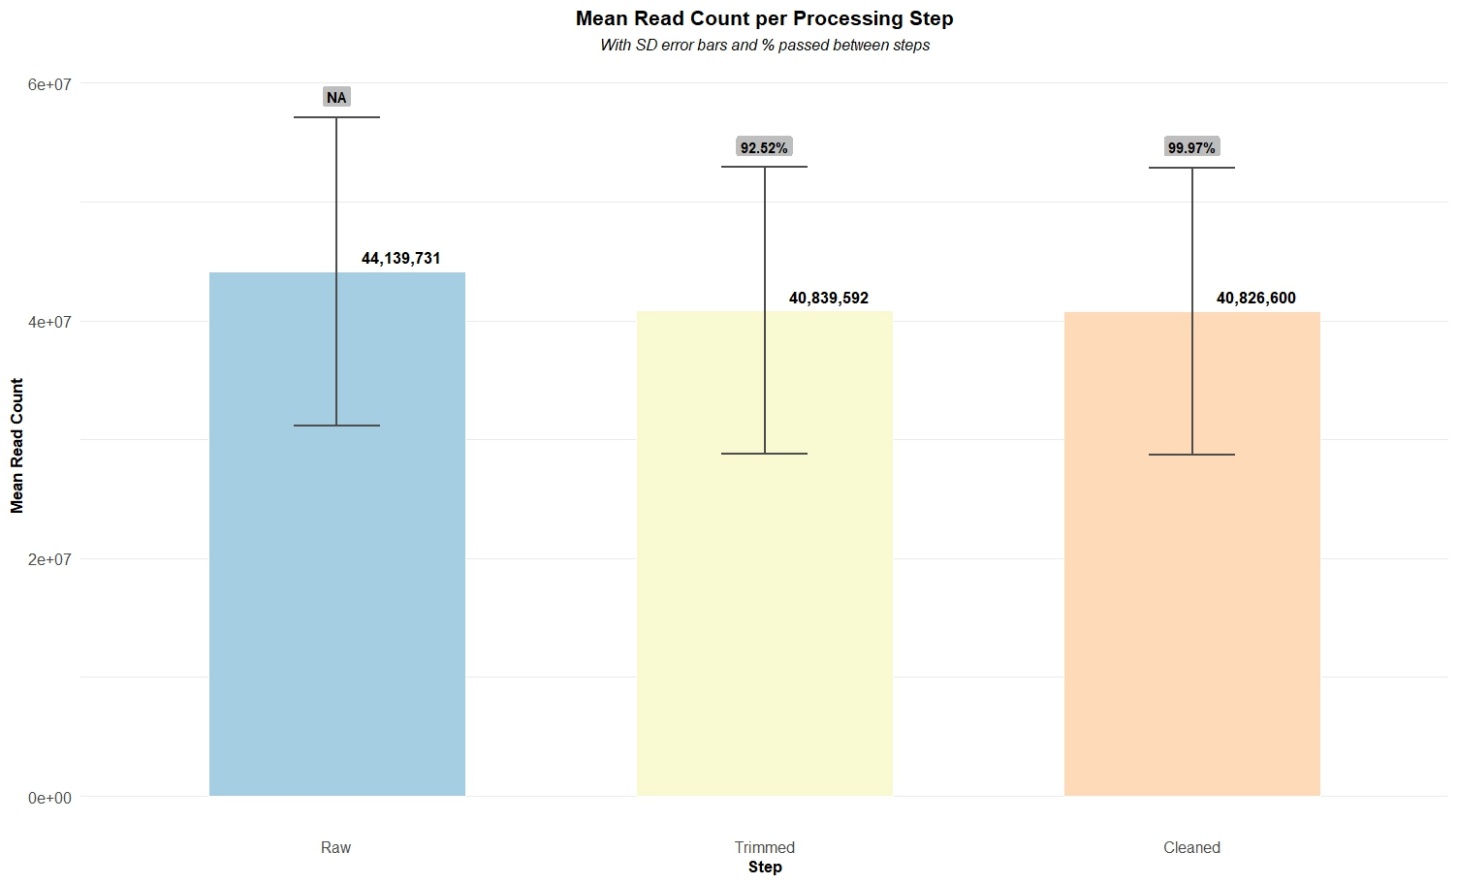 |
| --- |
| **B**  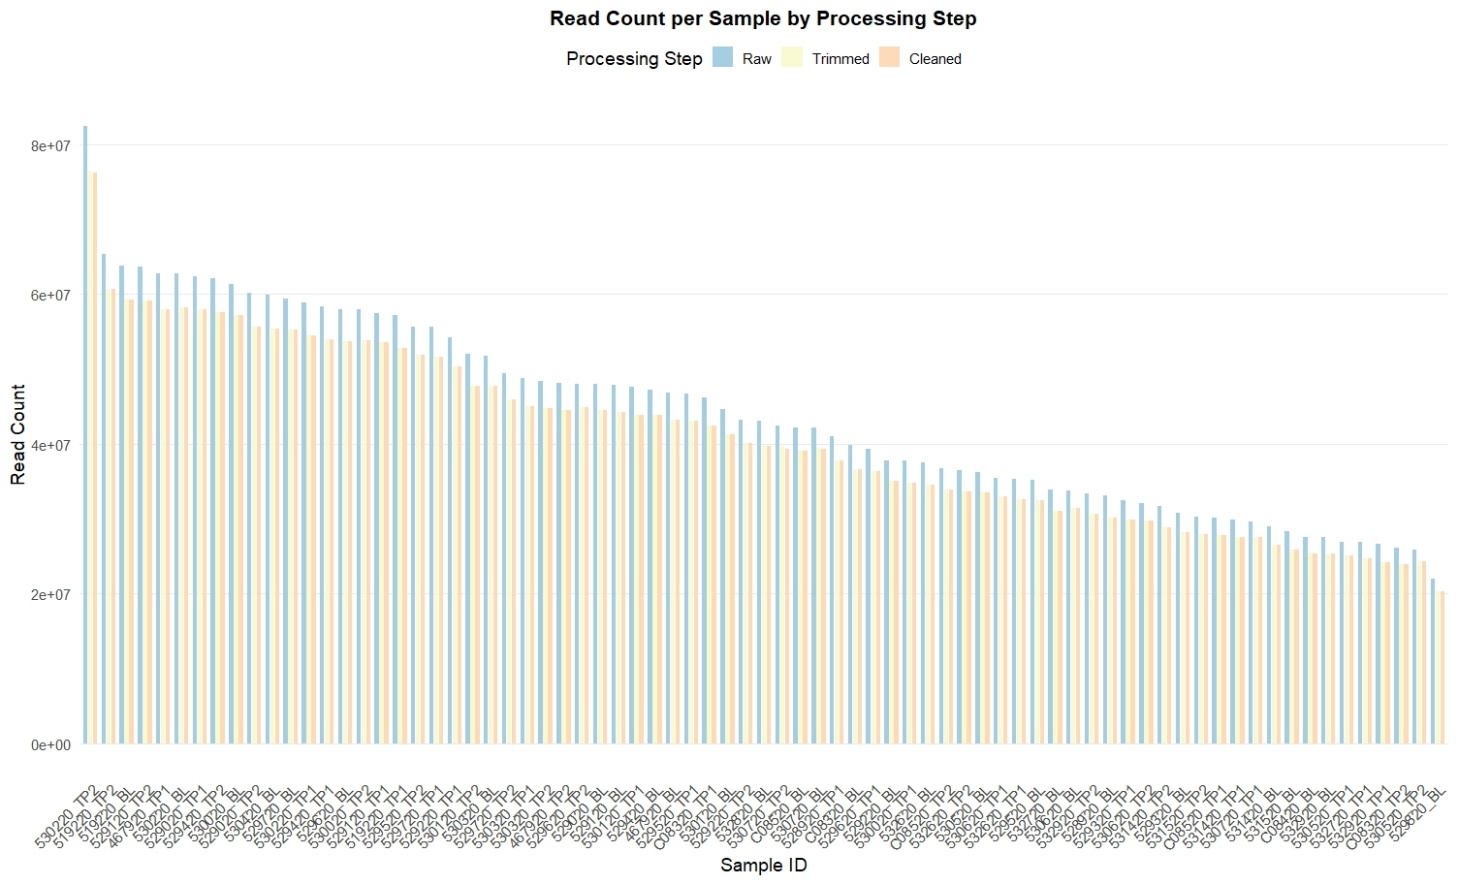 |

# Figure S3. Summary of shotgun metagenomic read counts across processing steps. (A) Mean read counts (± SD) at each processing step. (B) Per-sample read count distribution across processing steps.

| **A**  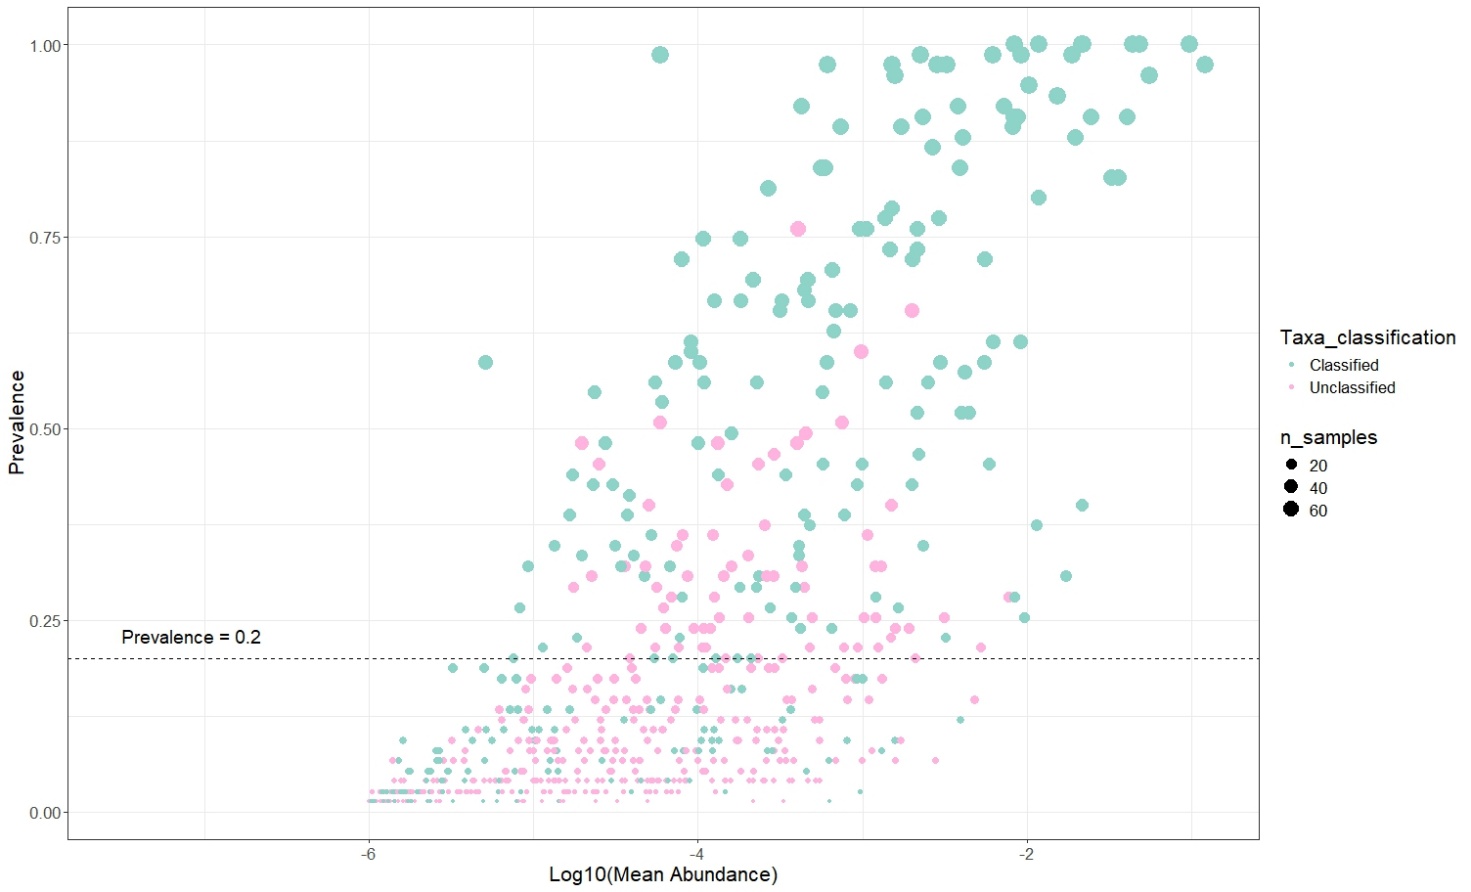 |
| --- |
| **B**  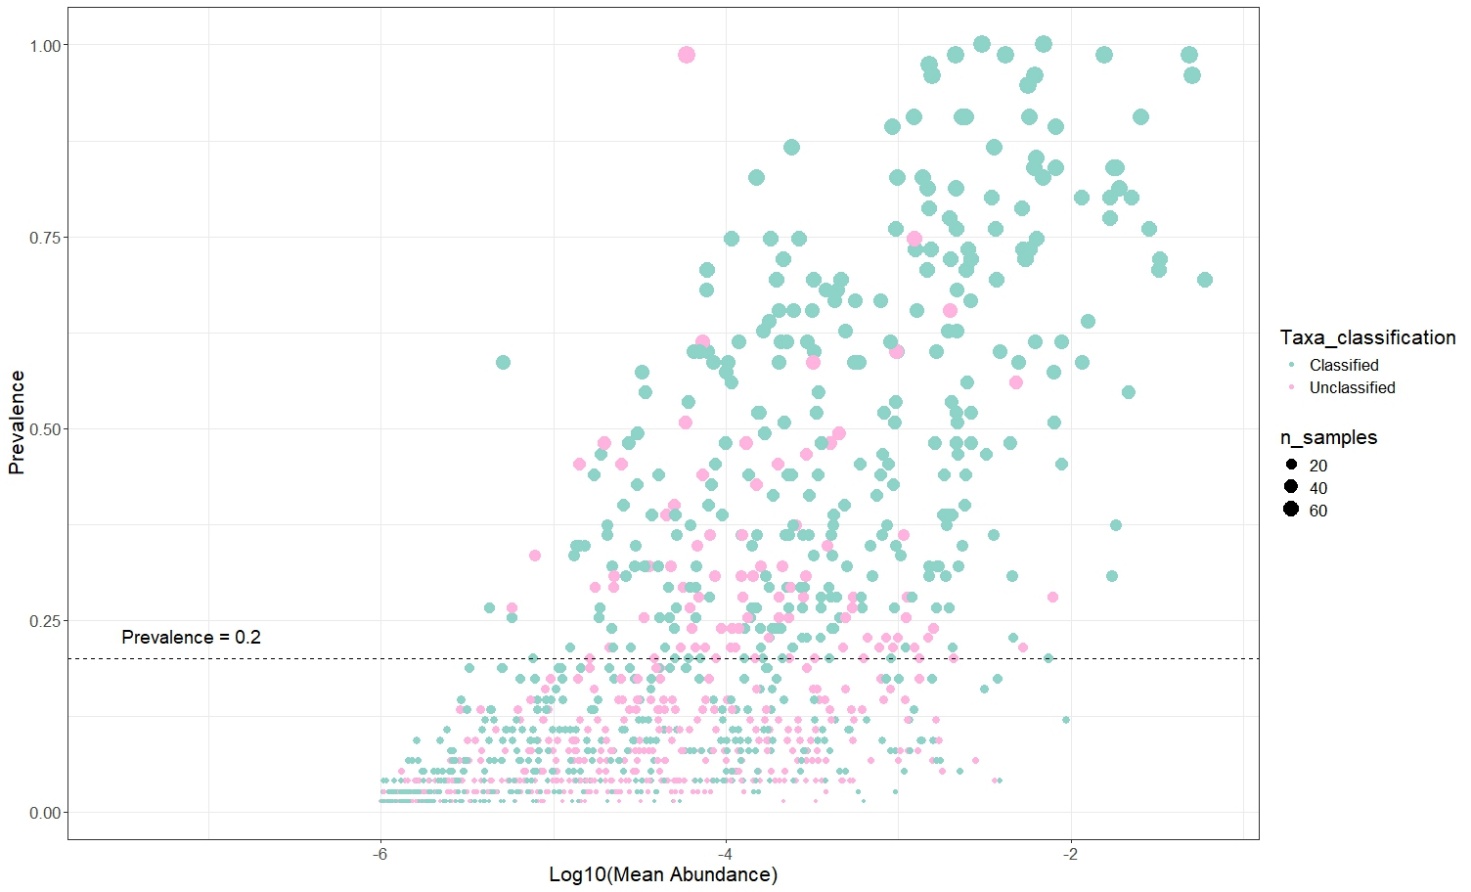 |

# Figure S4. Prevalence–abundance relationship and taxonomic classification status of identified taxa. Each point represents a taxon, with size proportional to the number of samples in which it was detected. Scatter plot showing the relationship between mean relative abundance (x-axis, log10-transformed) and prevalence (y-axis) of identified taxa. (A) Genue level; (B) Species level.

**
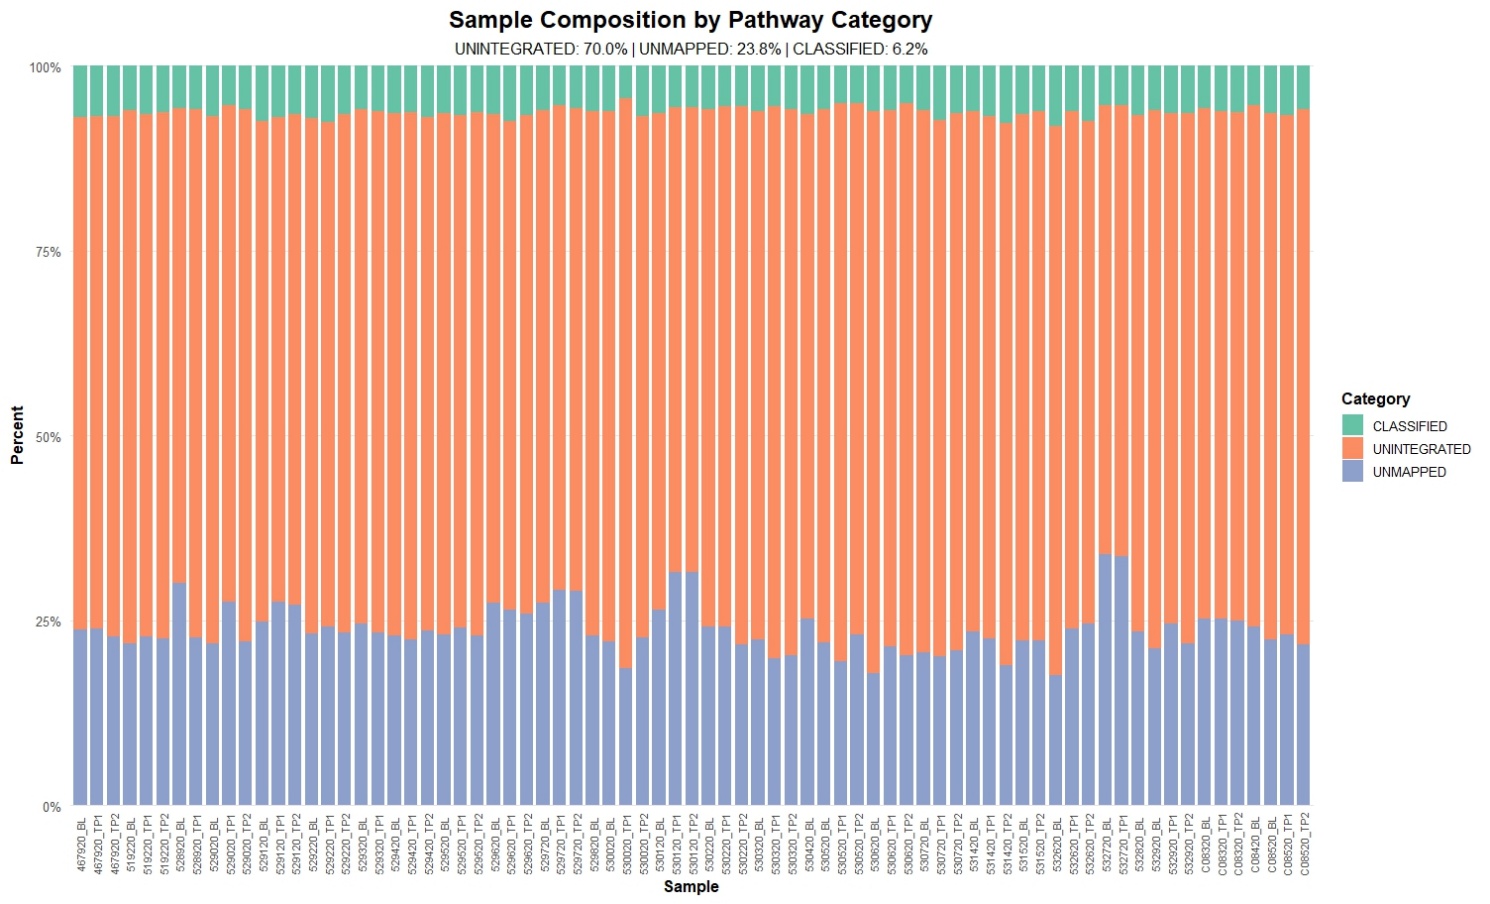
**

# Figure S5. Distribution of pathway classification categories across samples. Stacked bar plots show the relative proportion of classified, unintegrated, and unmapped pathways per sample generated by HUMAnN3 functional profiling.


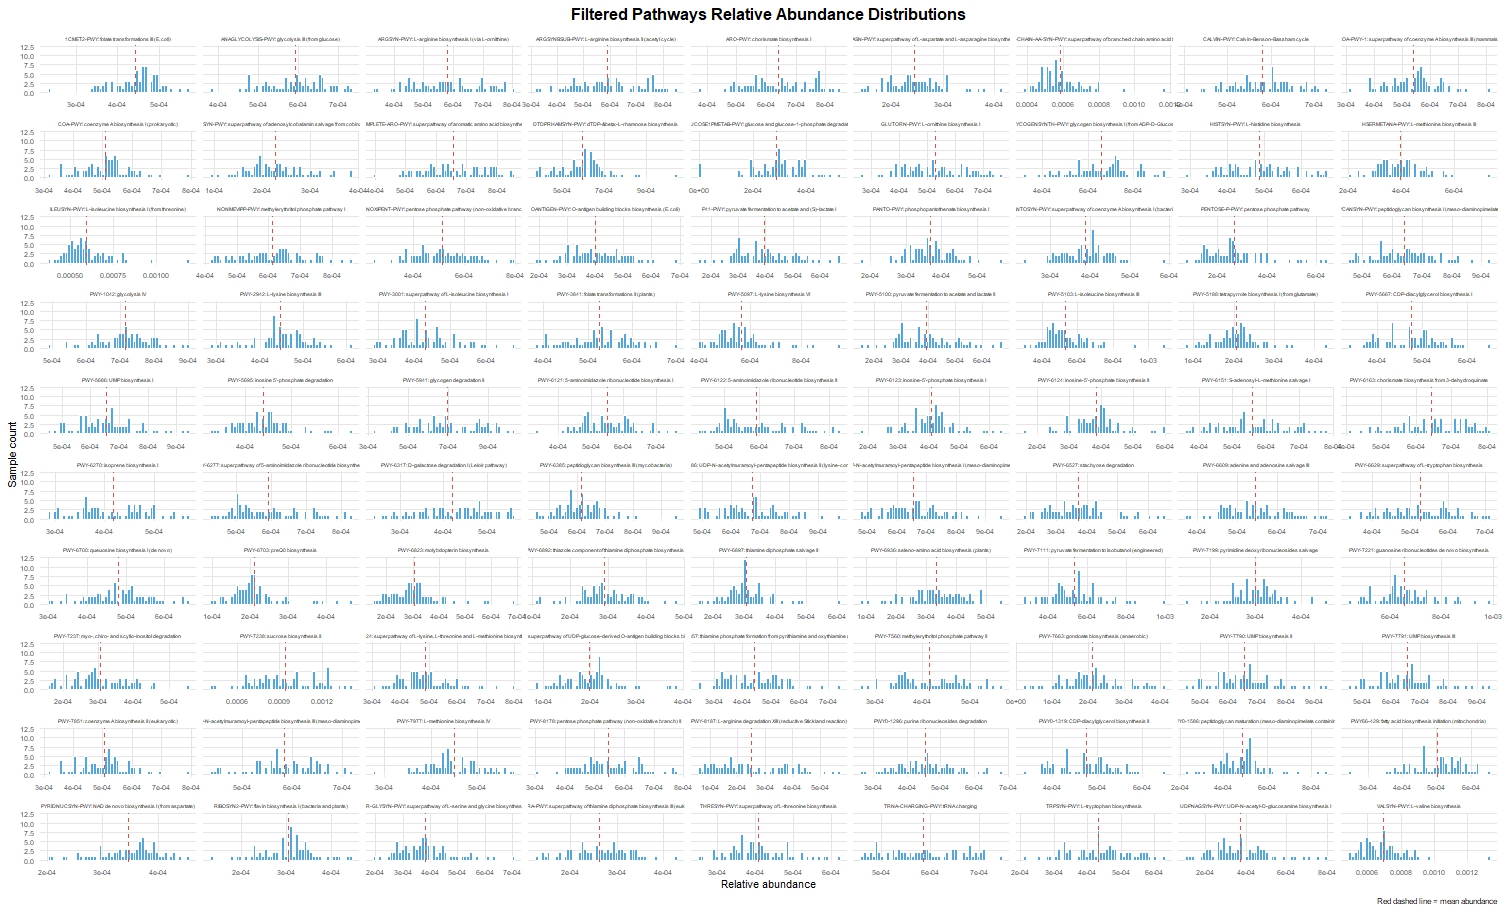


# Figure S6. Distribution of relative abundances of filtered microbial pathways. Histogram plots show the relative abundance distributions of pathways retained after coverage filtering (median coverage > 30%). Each panel represents a single pathway, with the red dashed line indicating the mean abundance across all samples.

| **A**  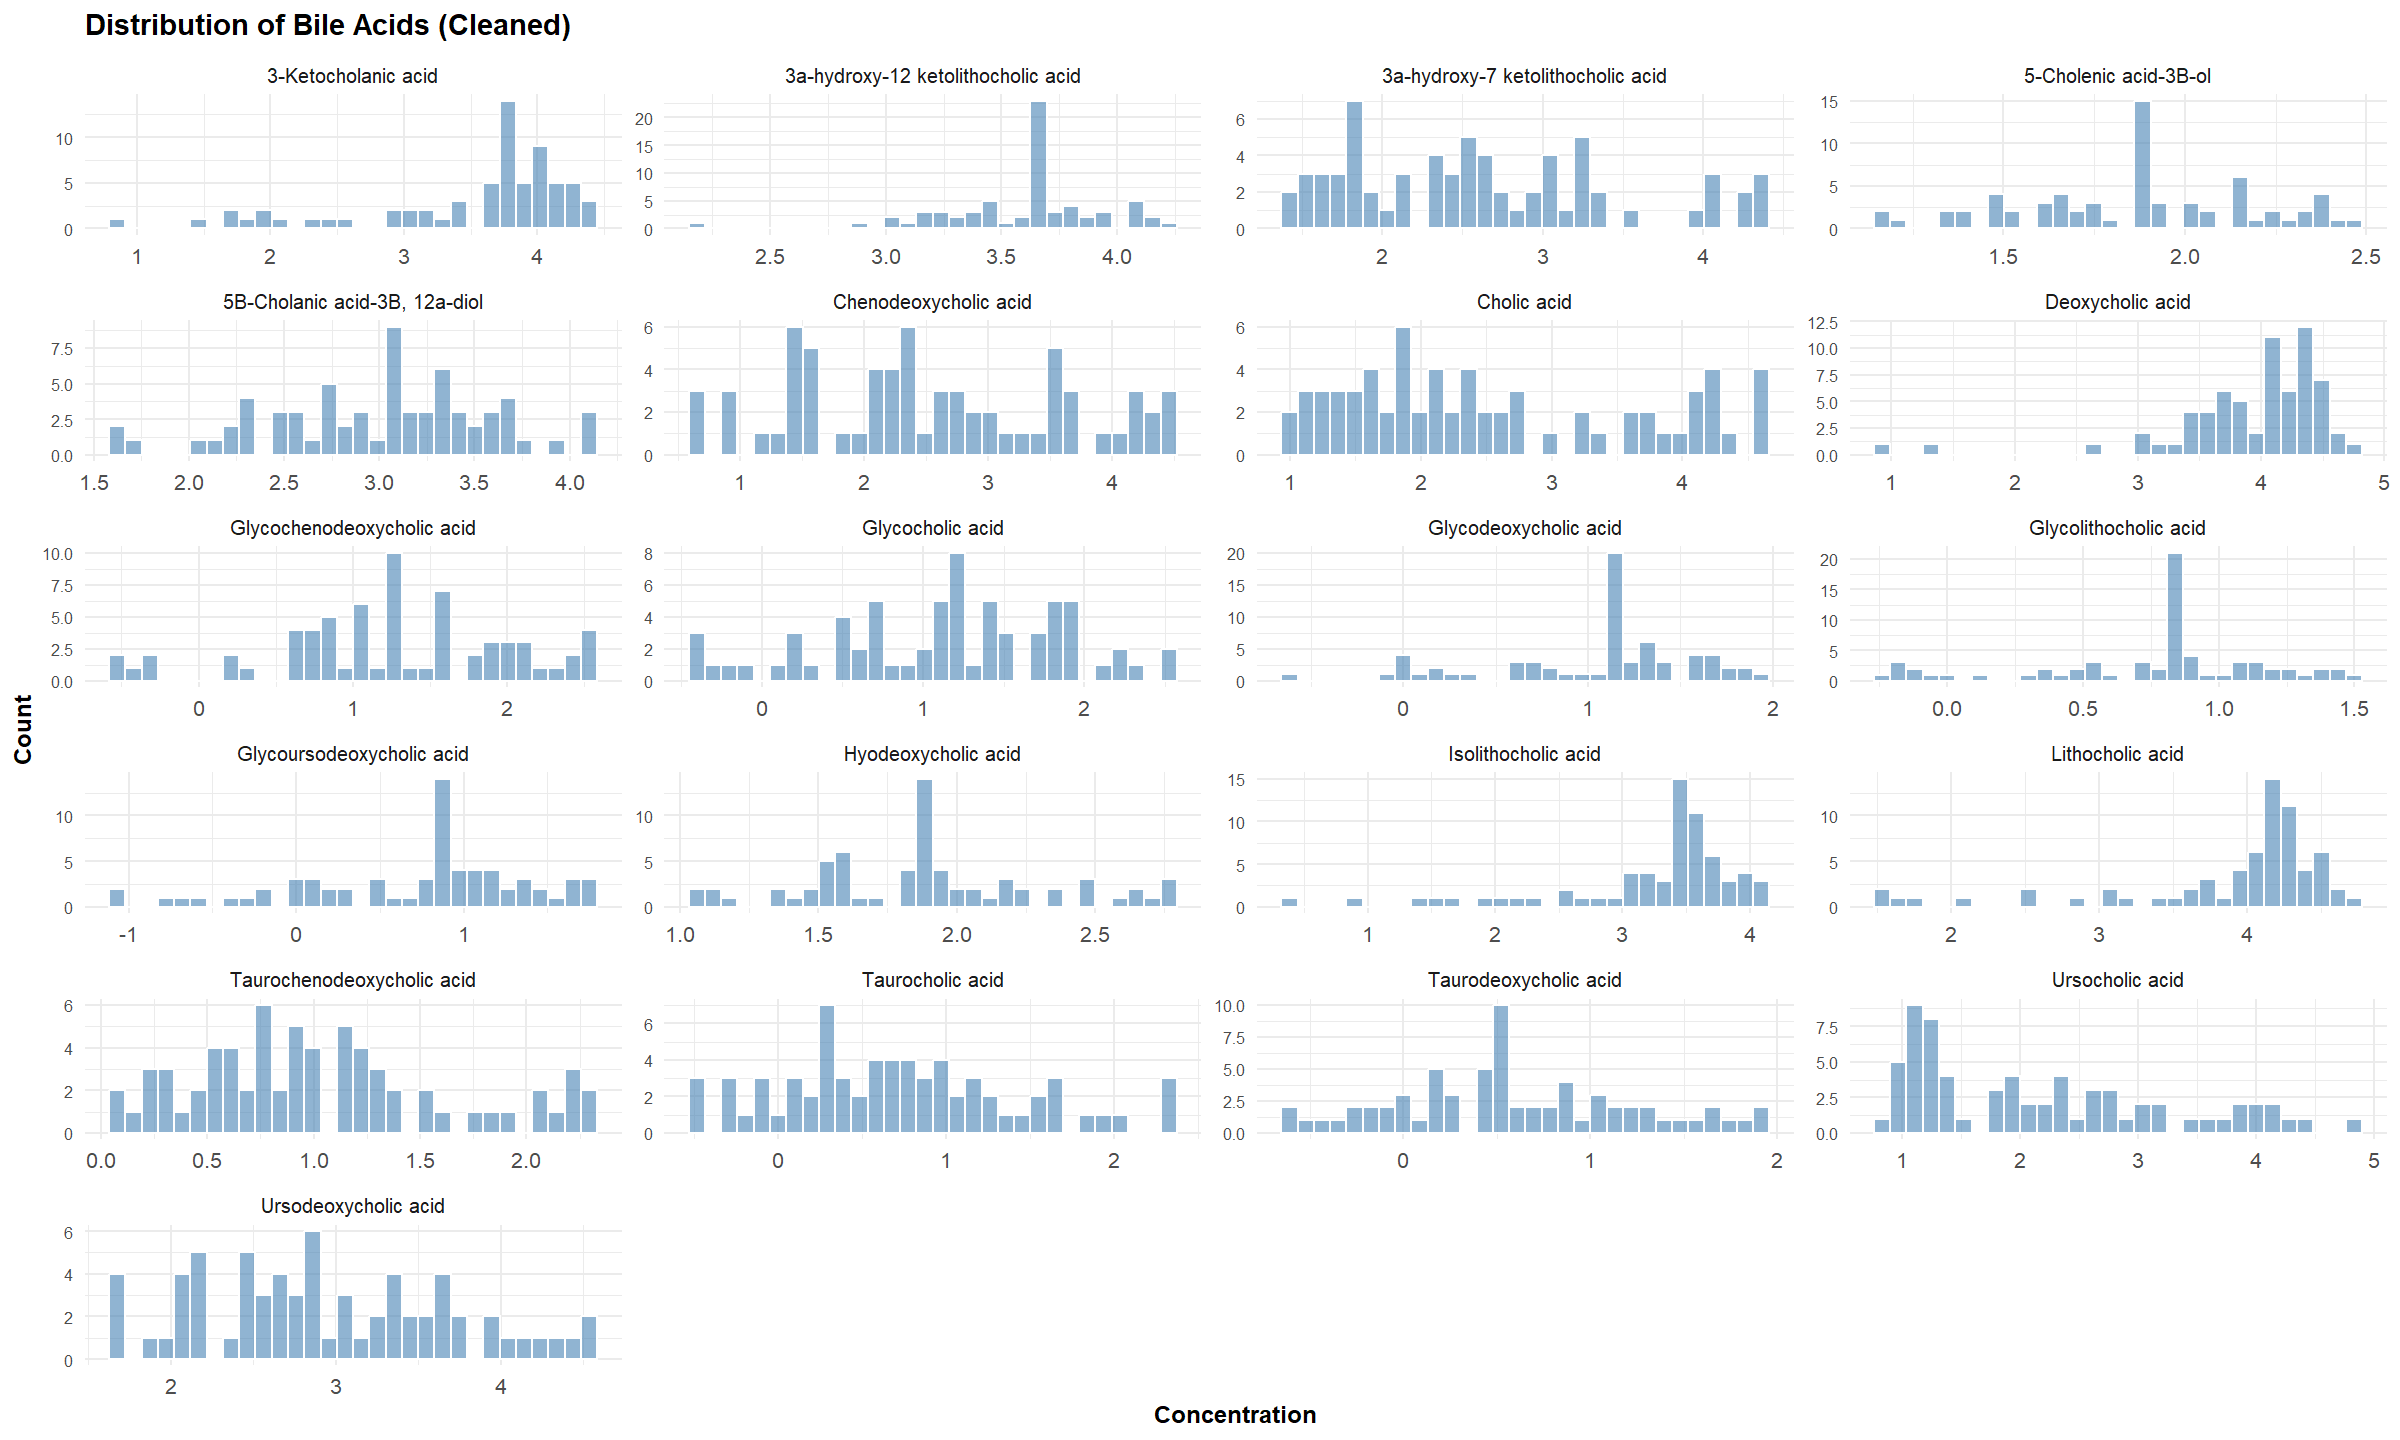 |
| --- |
| **B**  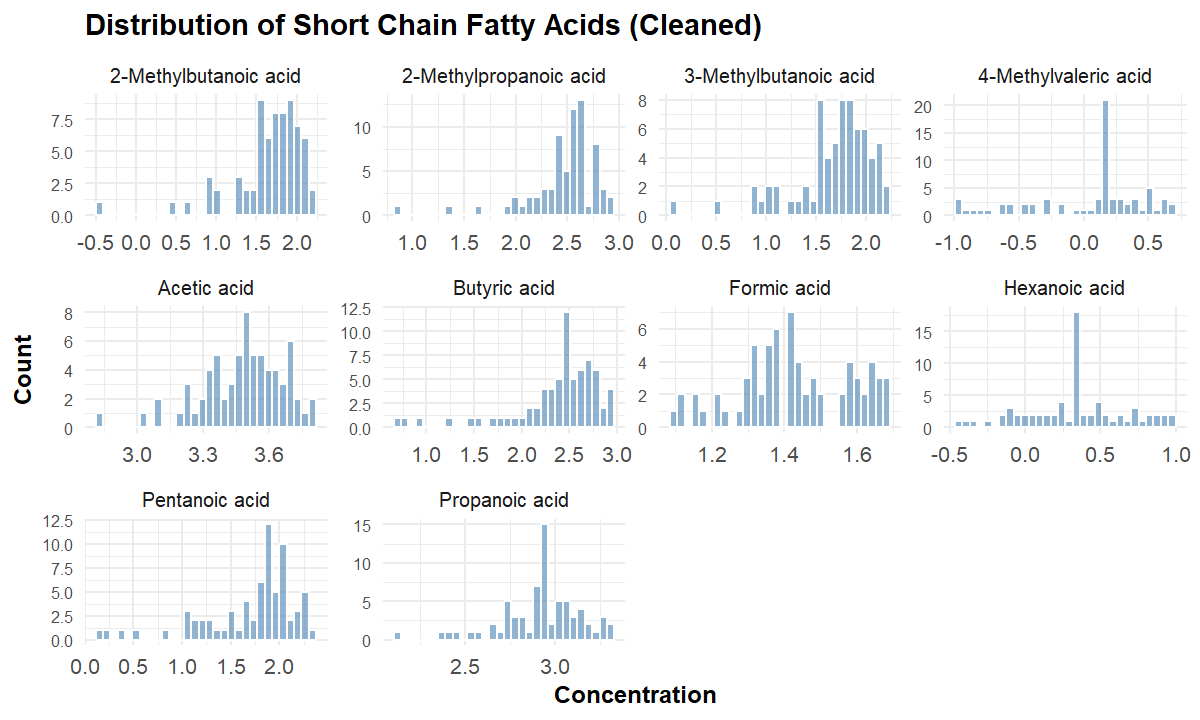 |

# Figure S7. Distributions of cleaned metabolite concentration data. Histogram plots illustrate the distribution of measured metabolite concentrations after data cleaning and normalization. (A) Bile acids; (B) Short chain fatty acids.


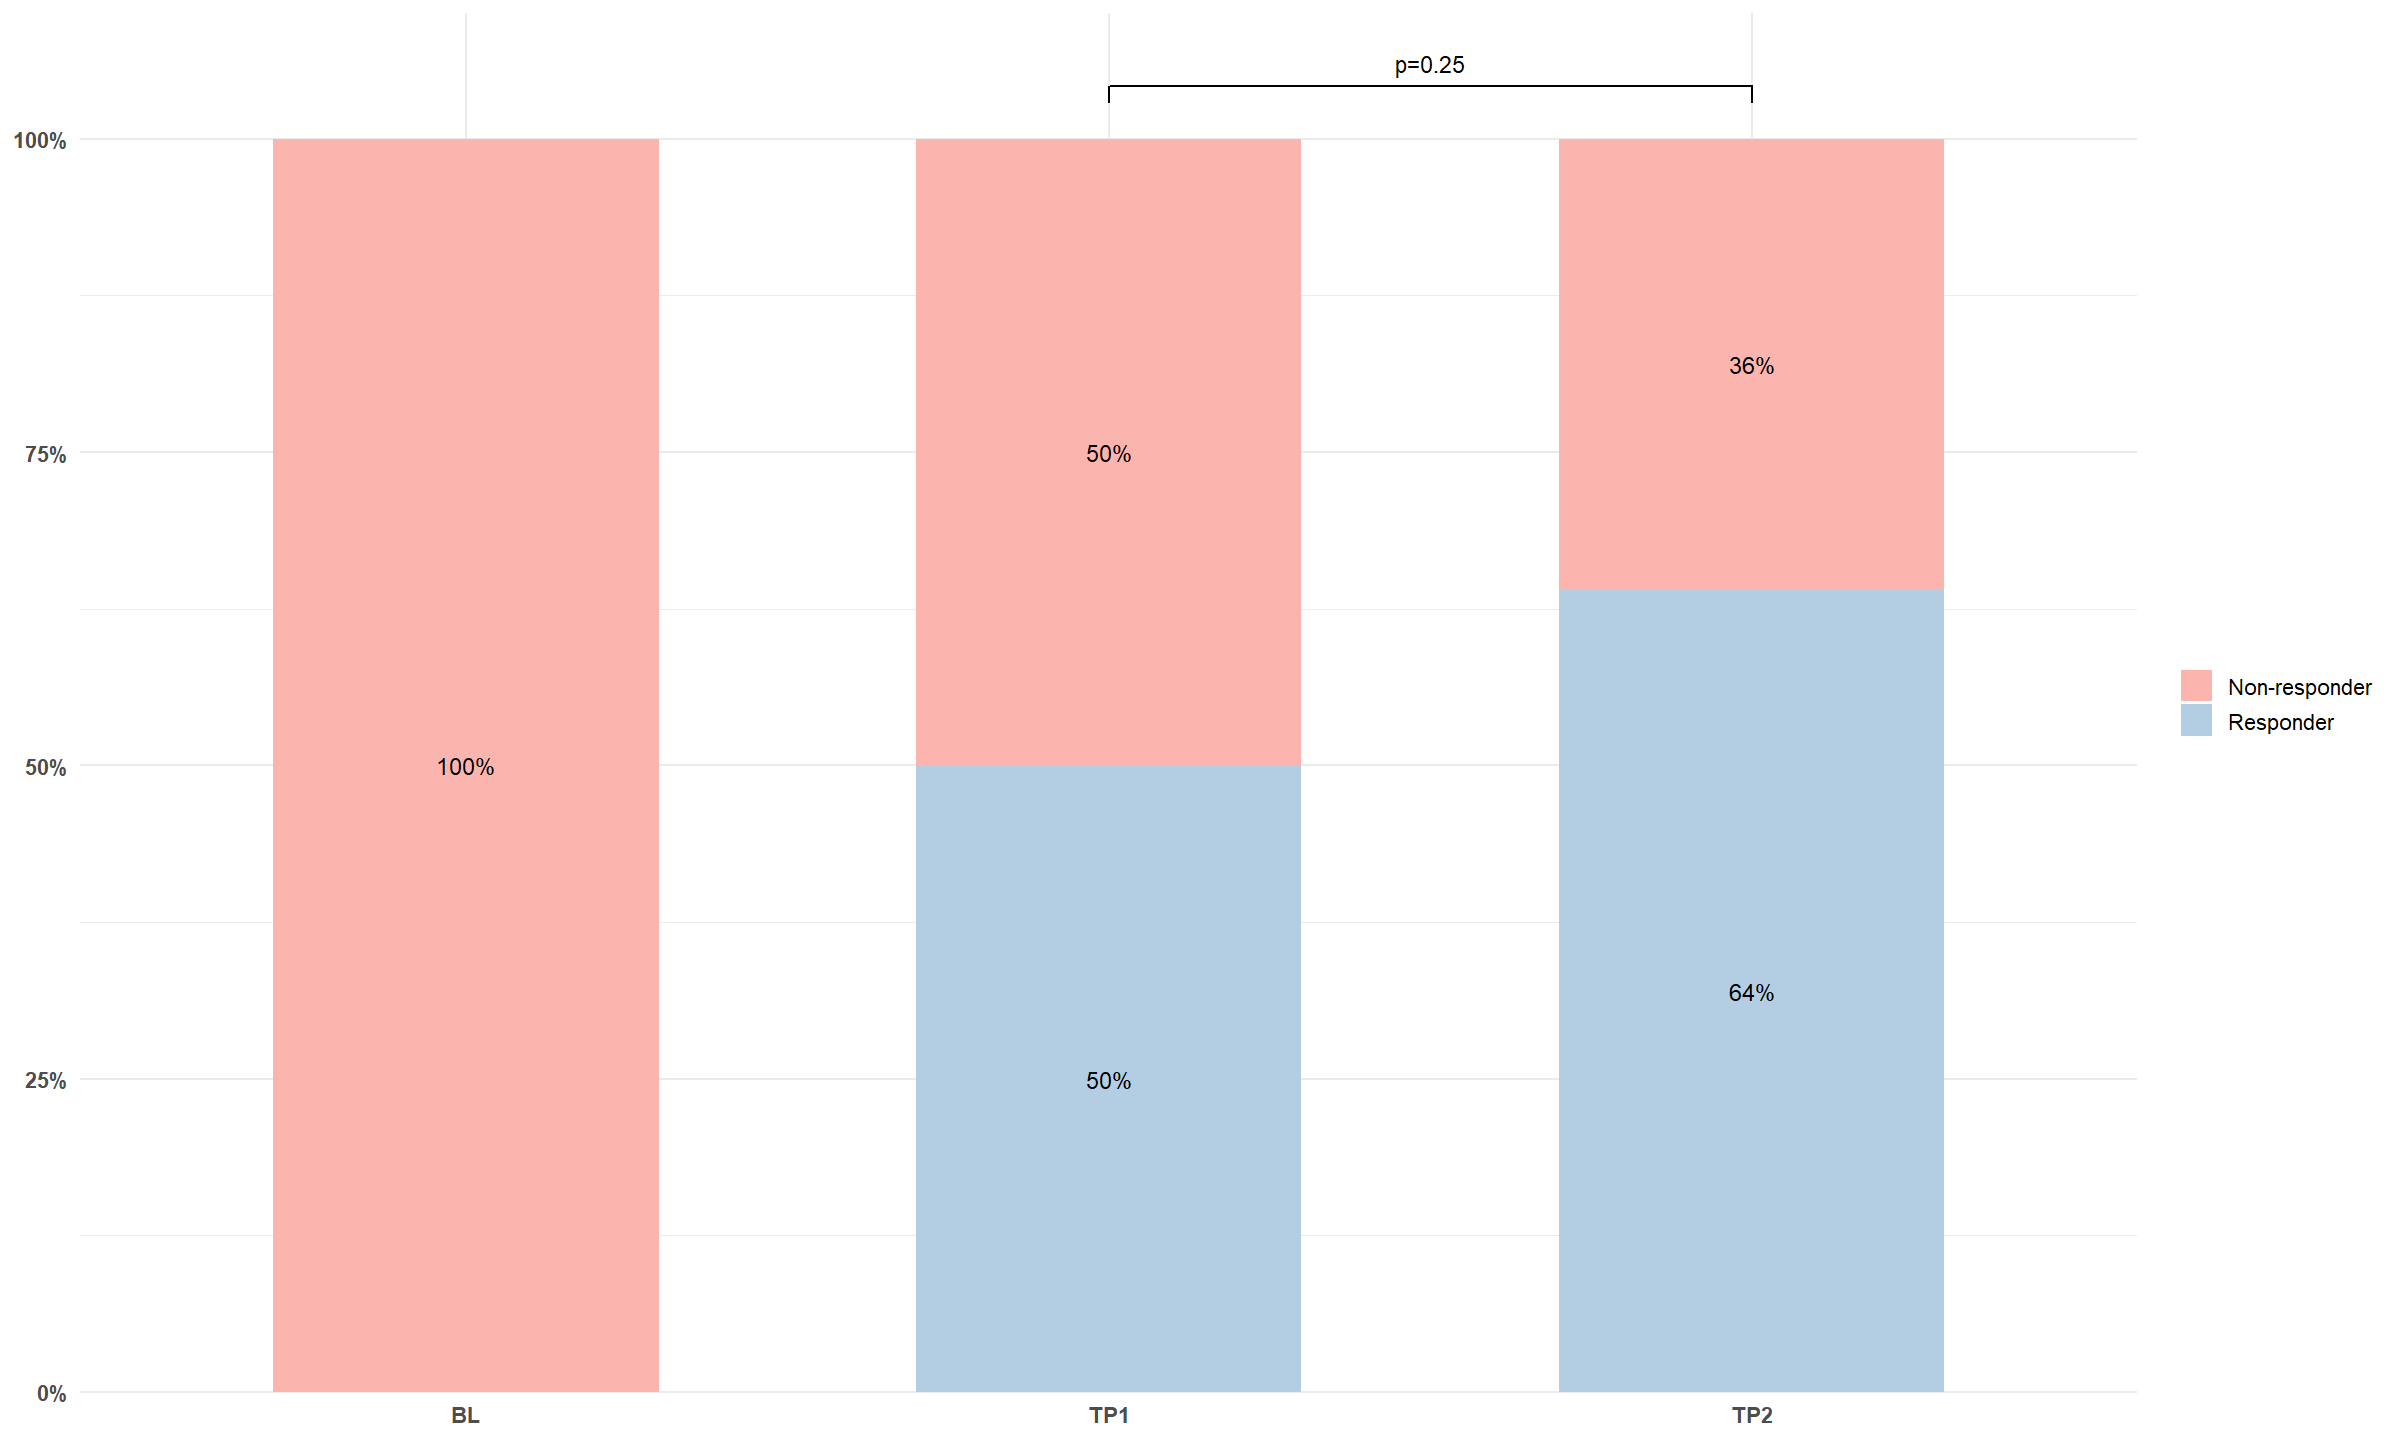


# Figure S8. Proportion of treatment responders across time points. Stacked bar plots illustrate the proportion of participants classified as responders and non-responders at each study time point (BL, TP1, TP2).


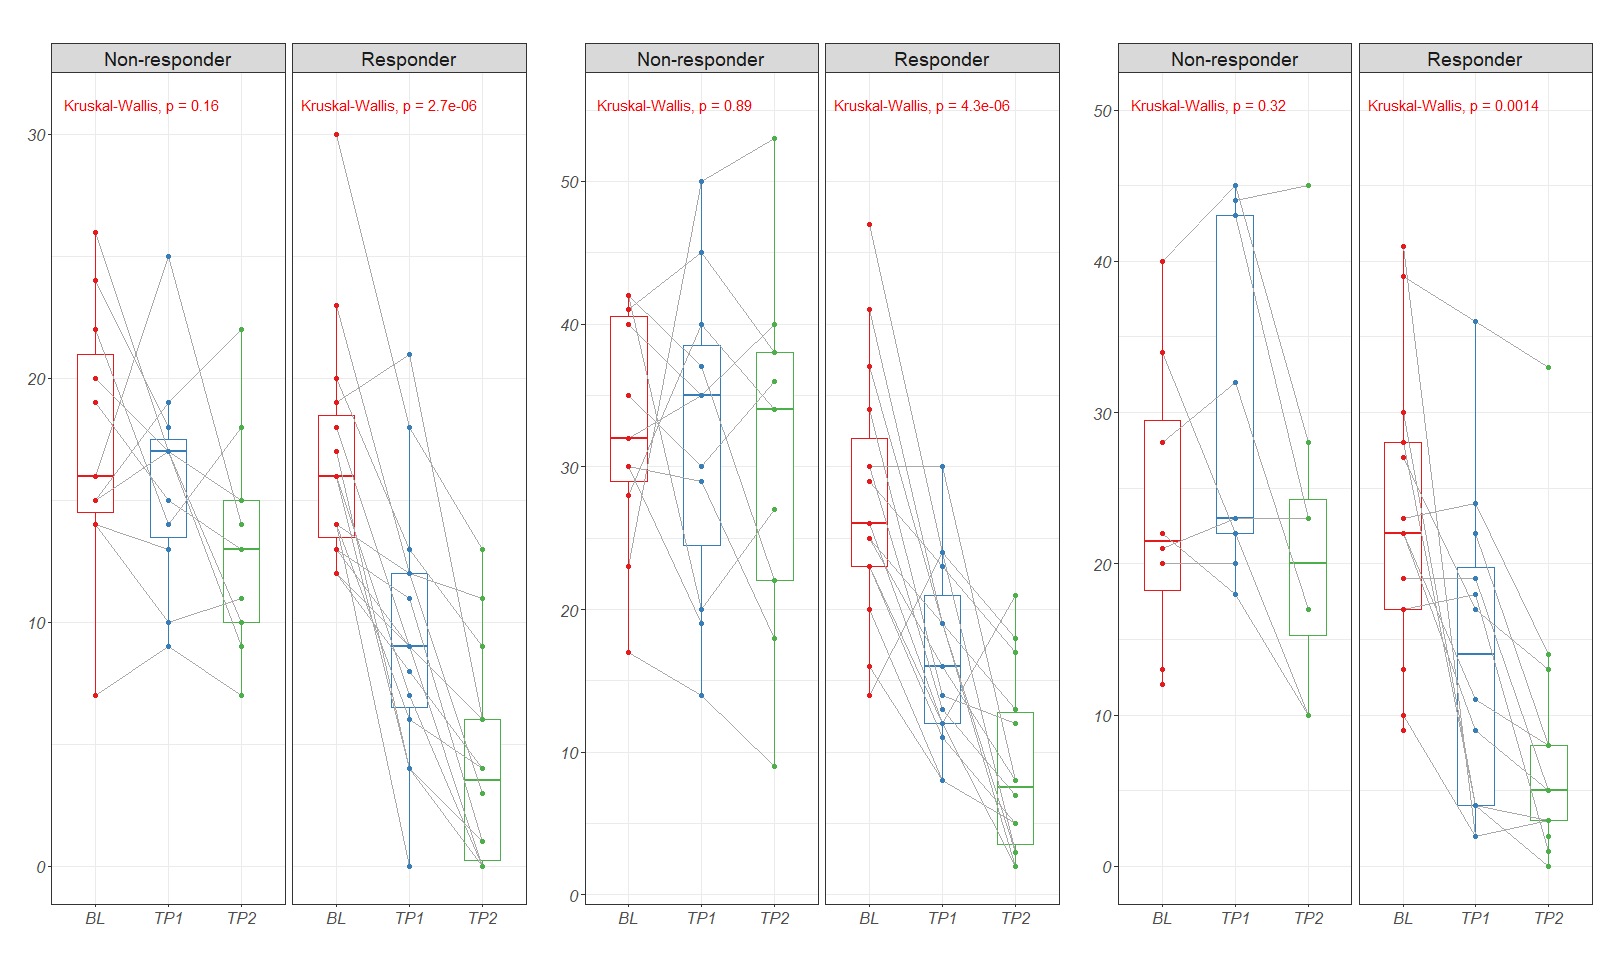


# Figure S9. Changes in symptom severity (HAMD) scores between groups over time. Individual trajectories are connected by grey lines, and boxplots represent score distributions at each time point. Statistical comparisons were performed using Kruskal–Wallis tests within each group.

| **A**  **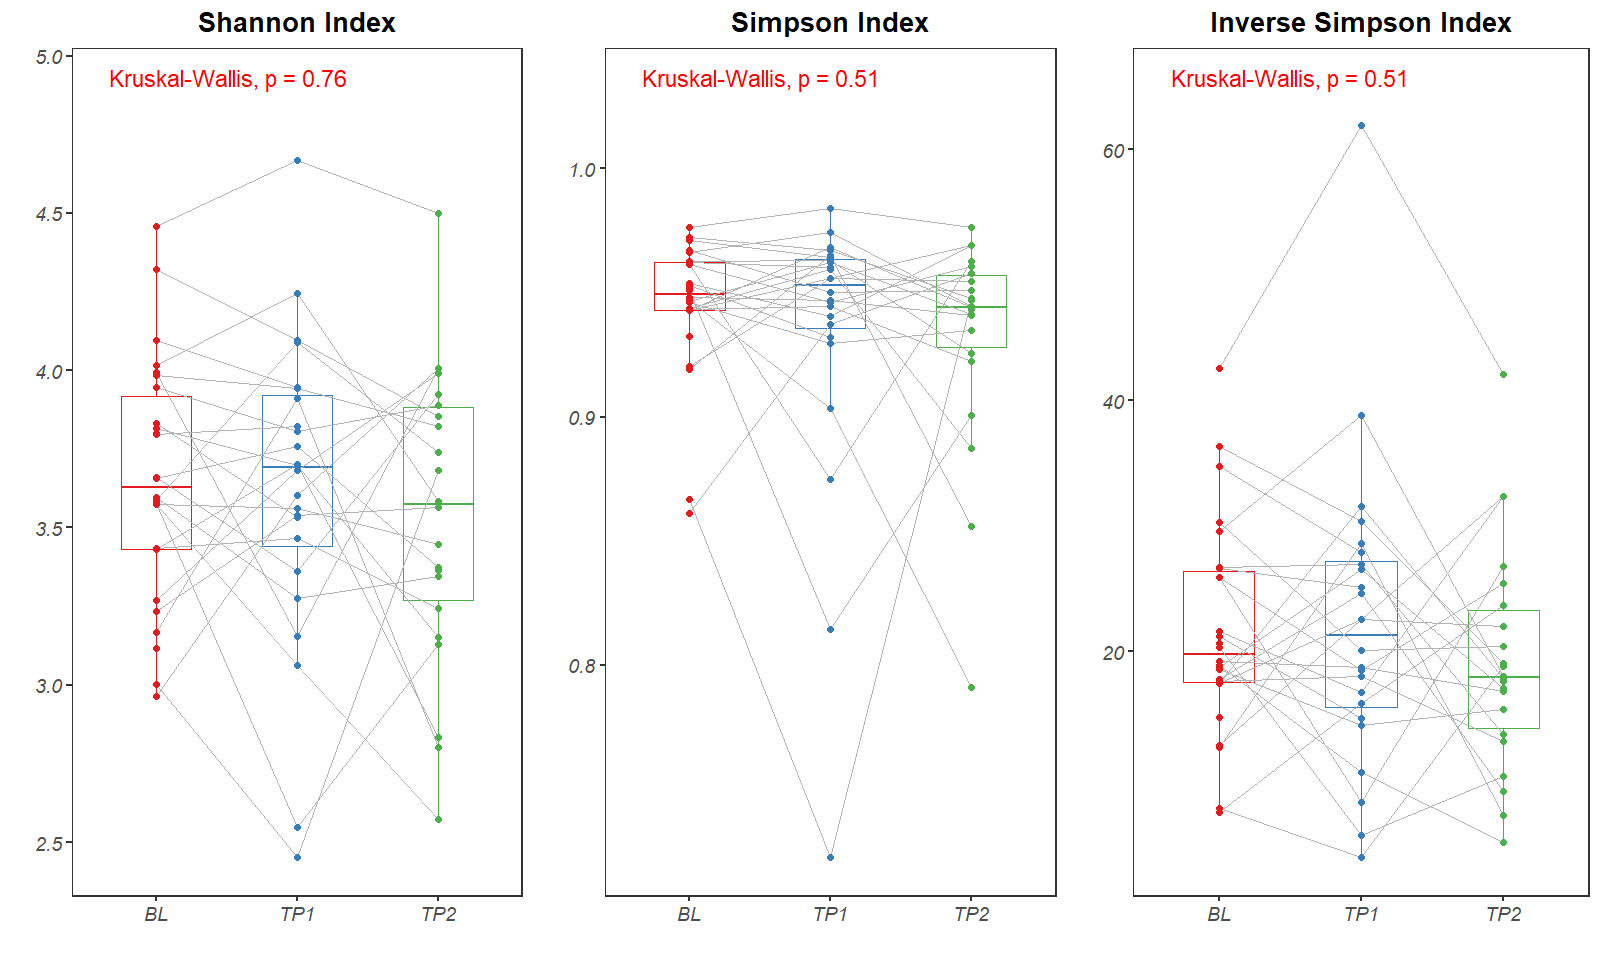** |
| --- |
| **B**  **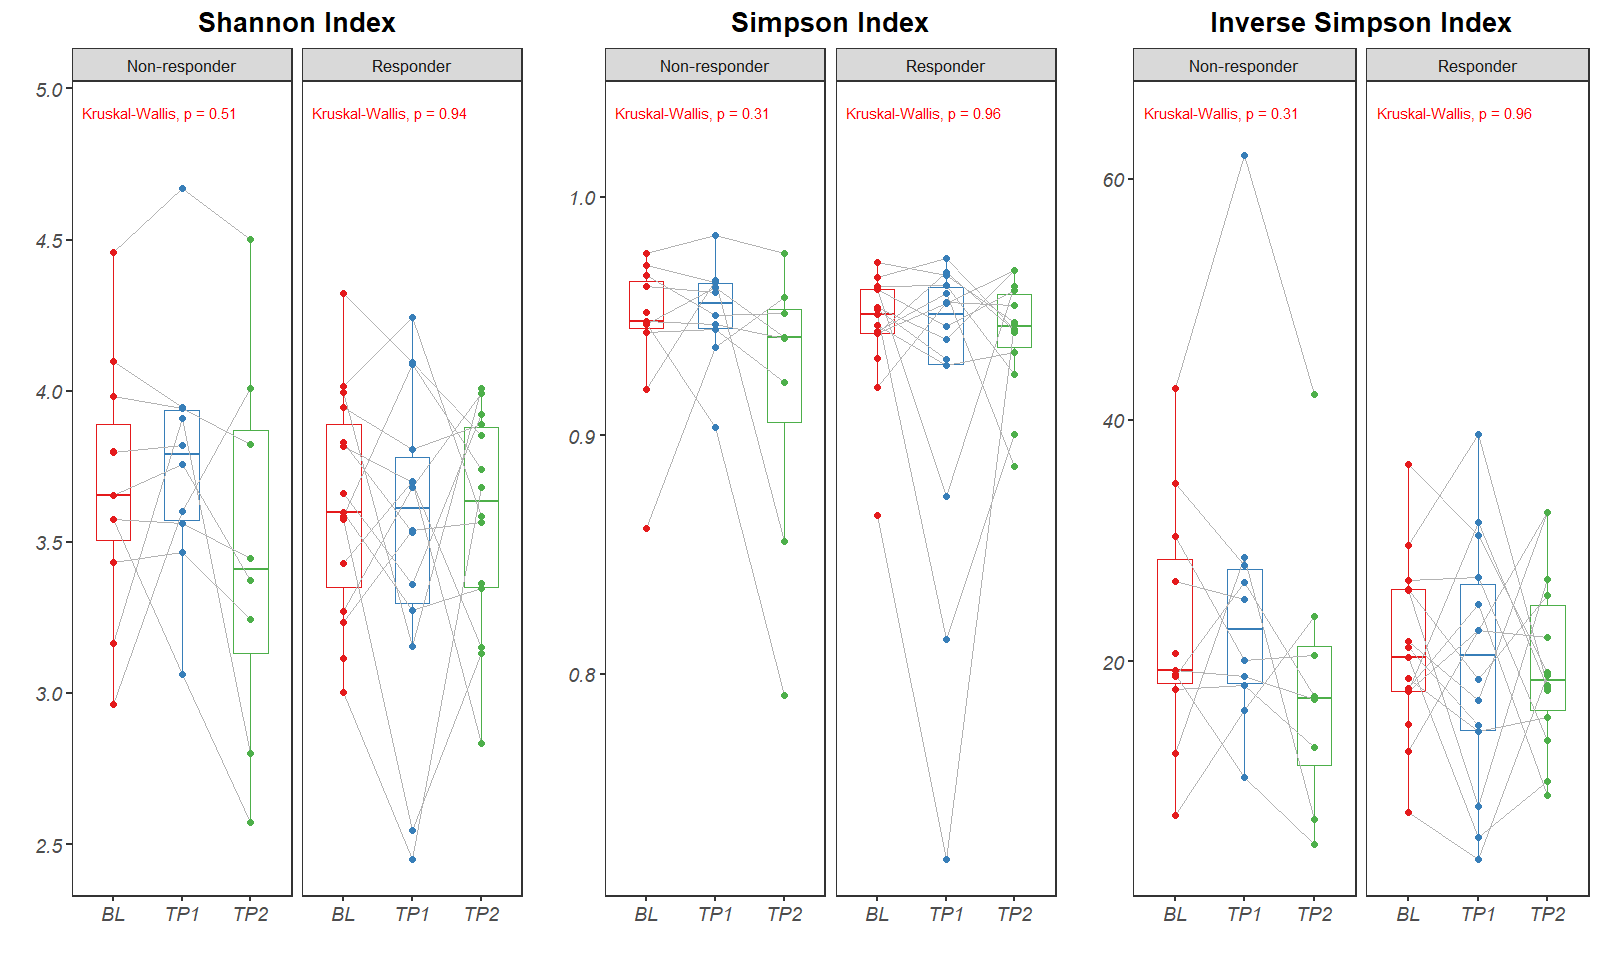** |
| **C**  **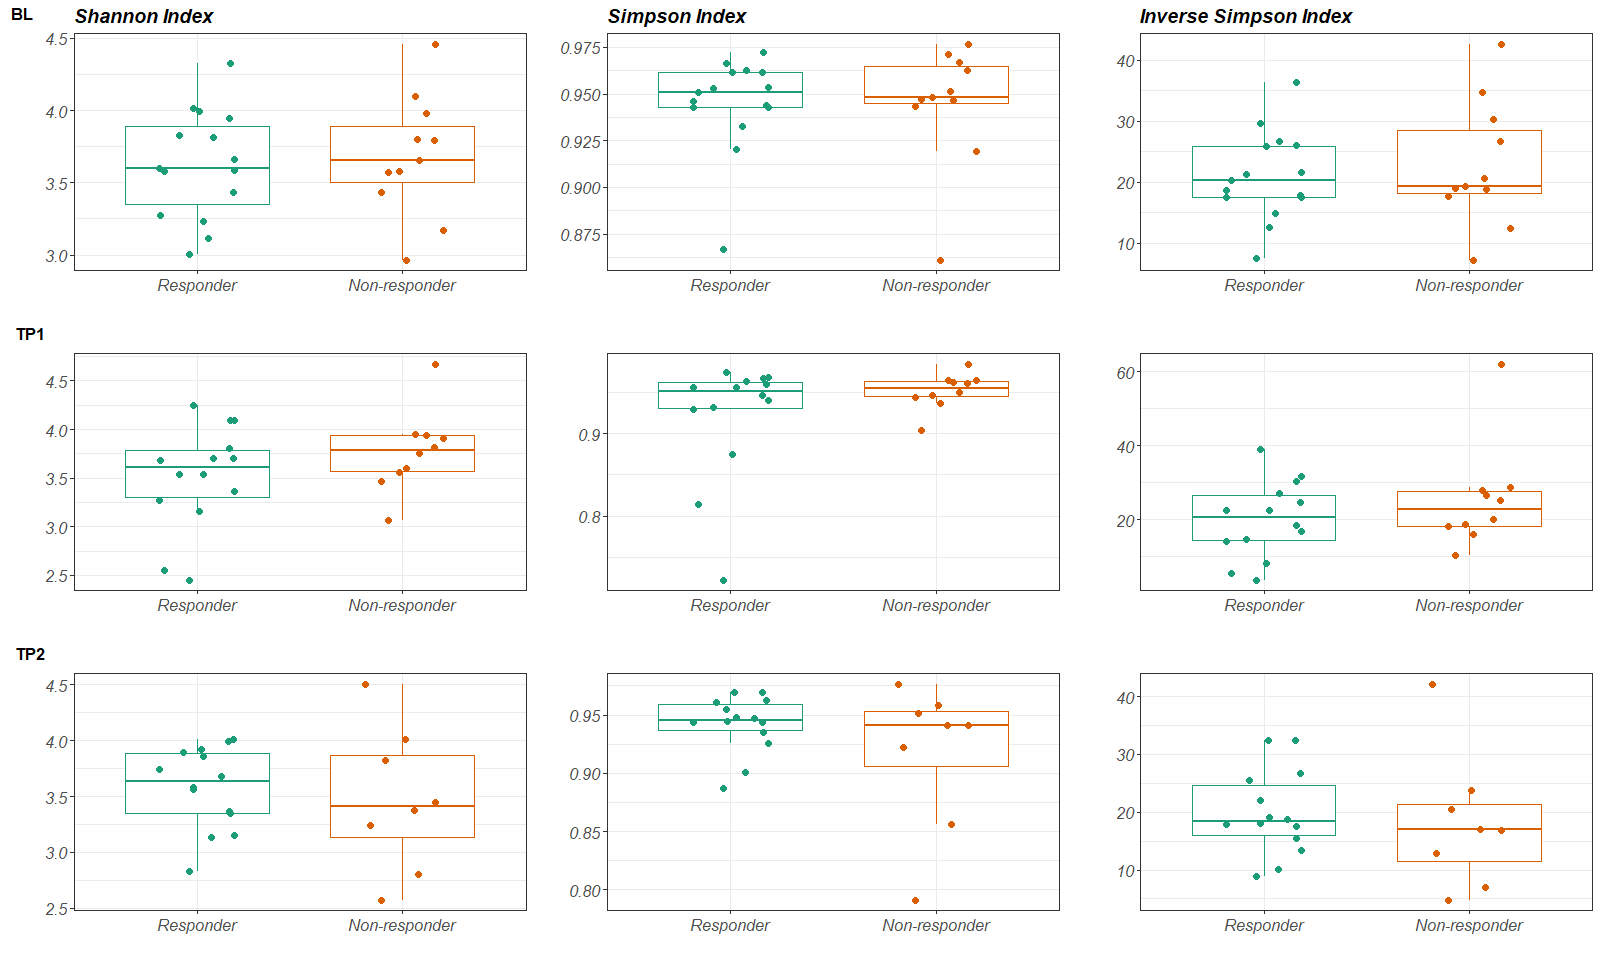** |

# Figure S10. Alpha diversity comparison across time points and treatment response groups. (A) Longitudinal changes of alpha diversity indices (Shannon, Simpson, and Inverse Simpson) across baseline (BL), TP1, and TP2 for all participants. (B) Changes in alpha diversity indices within responder and non-responder groups over time. (C) Cross-sectional comparison of alpha diversity indices between responders and non-responders at each time point. Kruskal–Wallis tests were applied to assess within-group temporal differences.

| **A**  **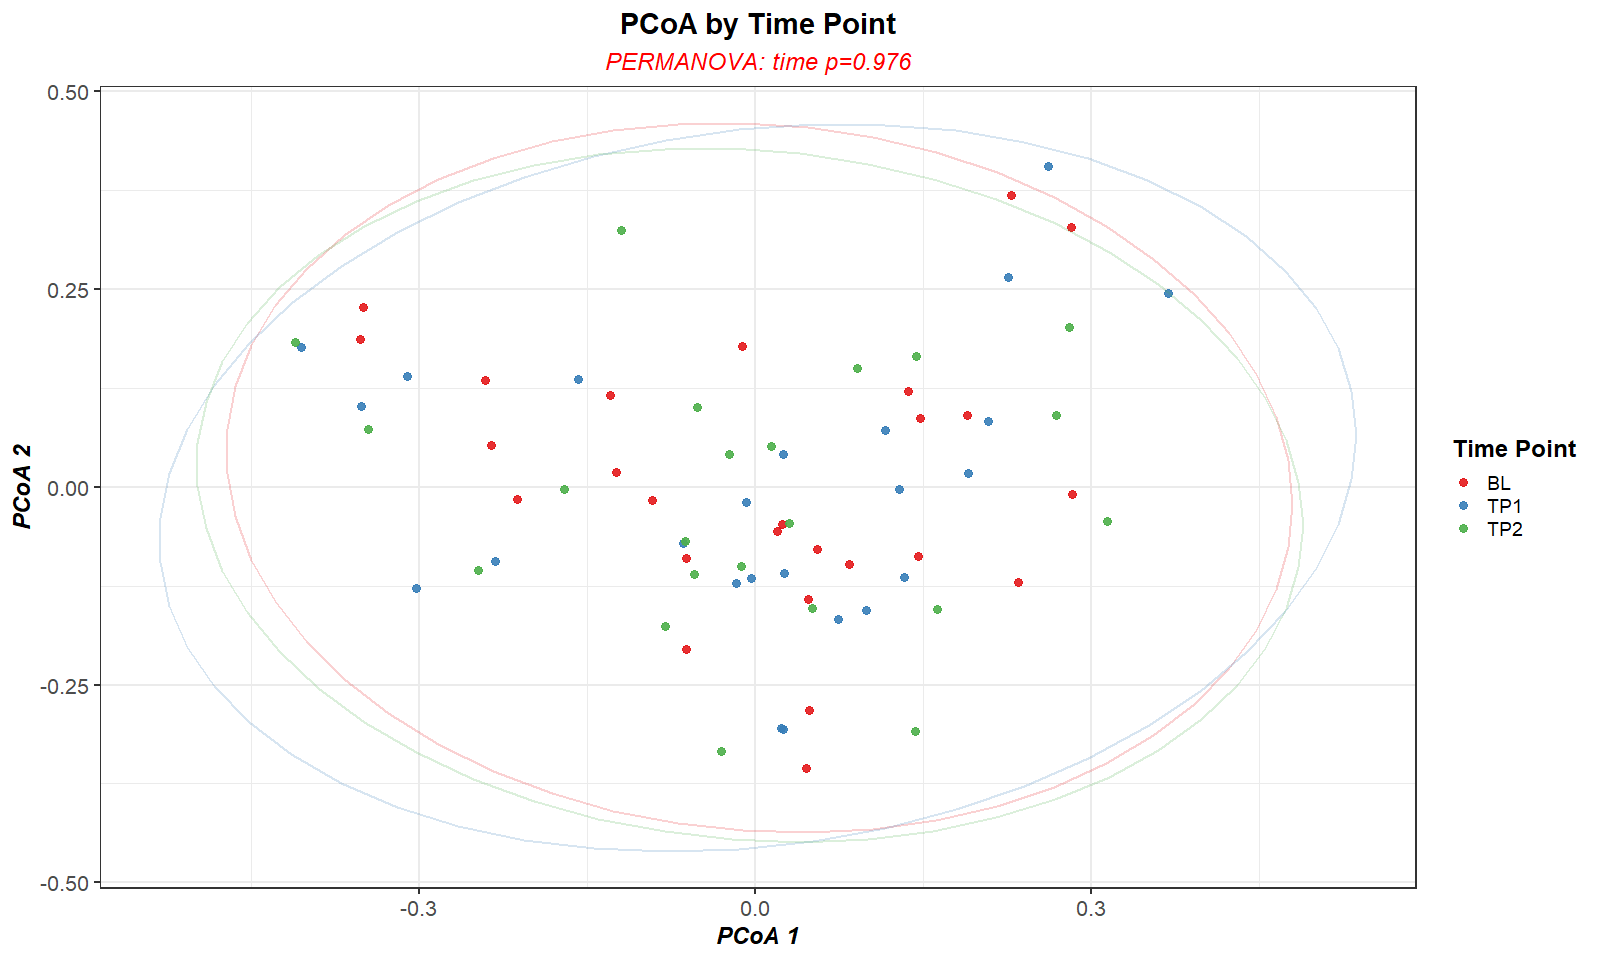** |
| --- |
| **B**  **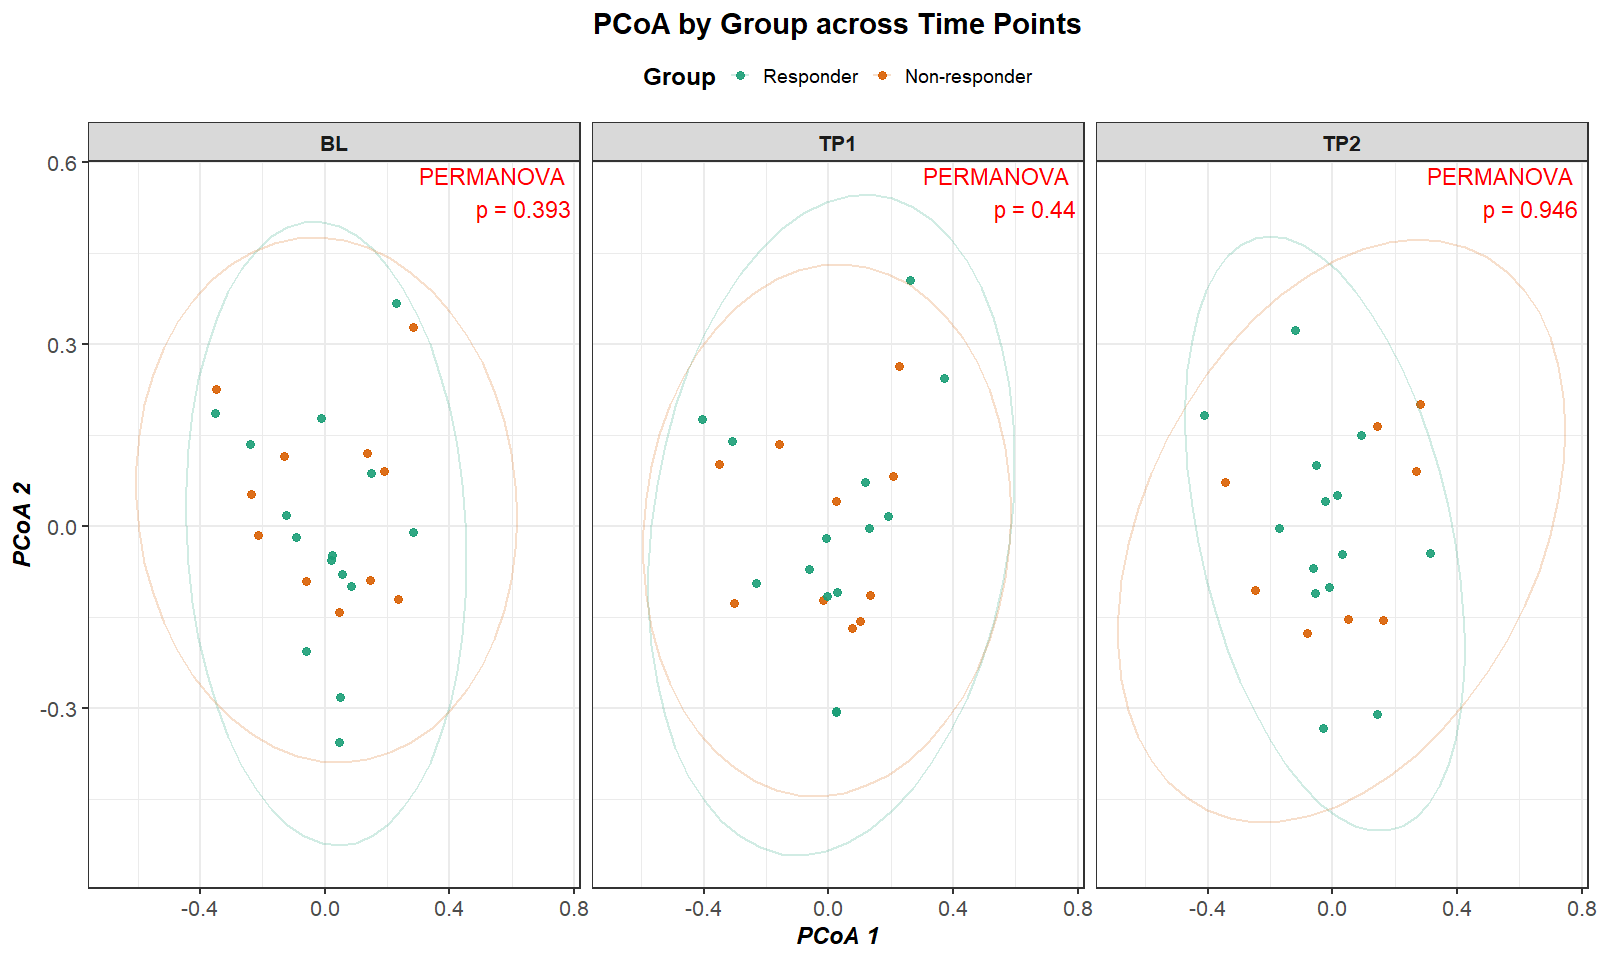** |
| **C**  *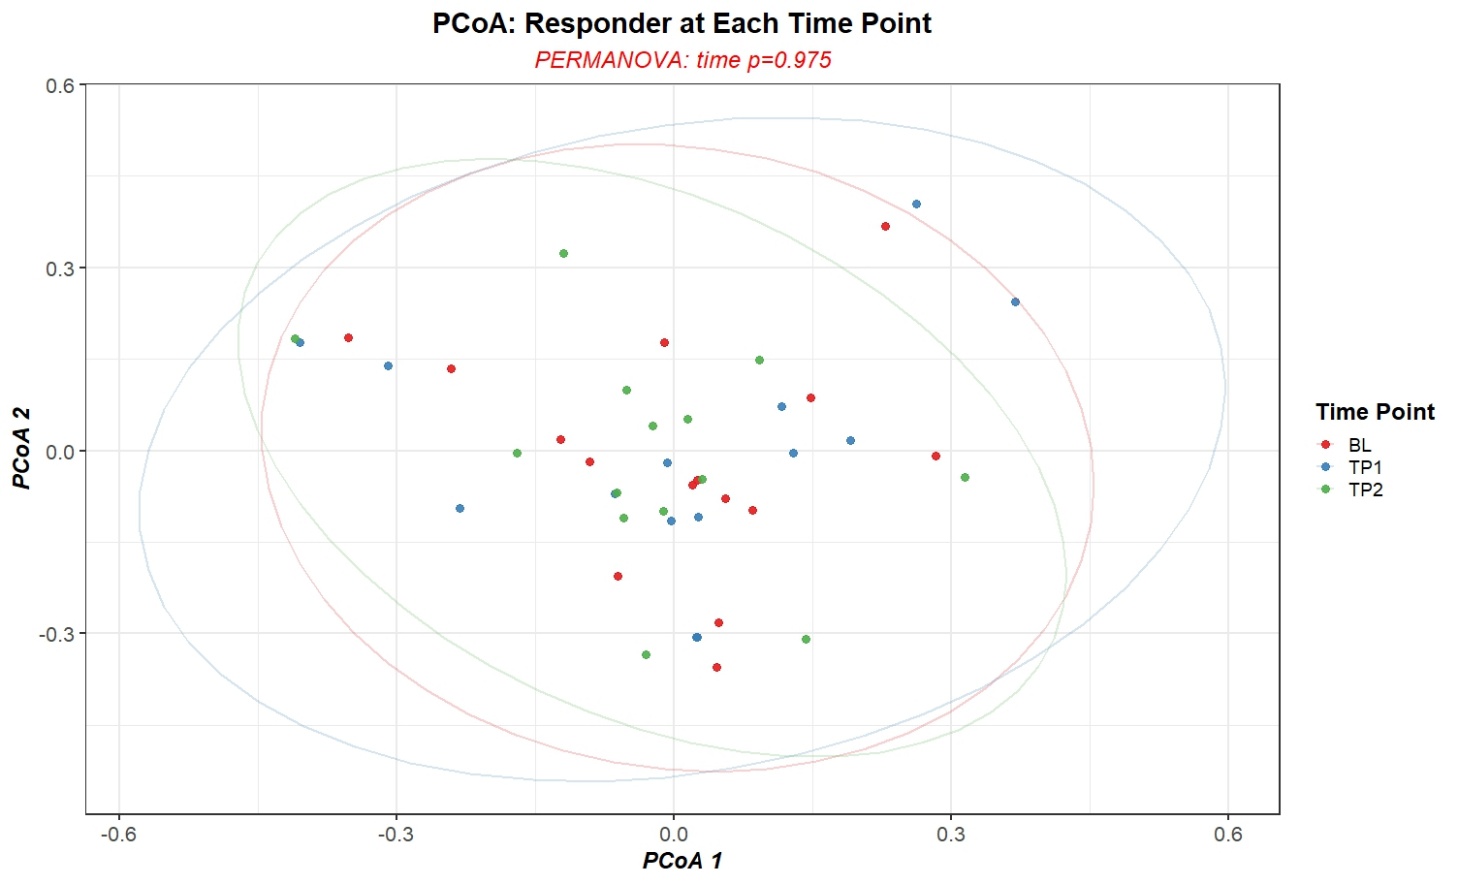* |
| **D**  *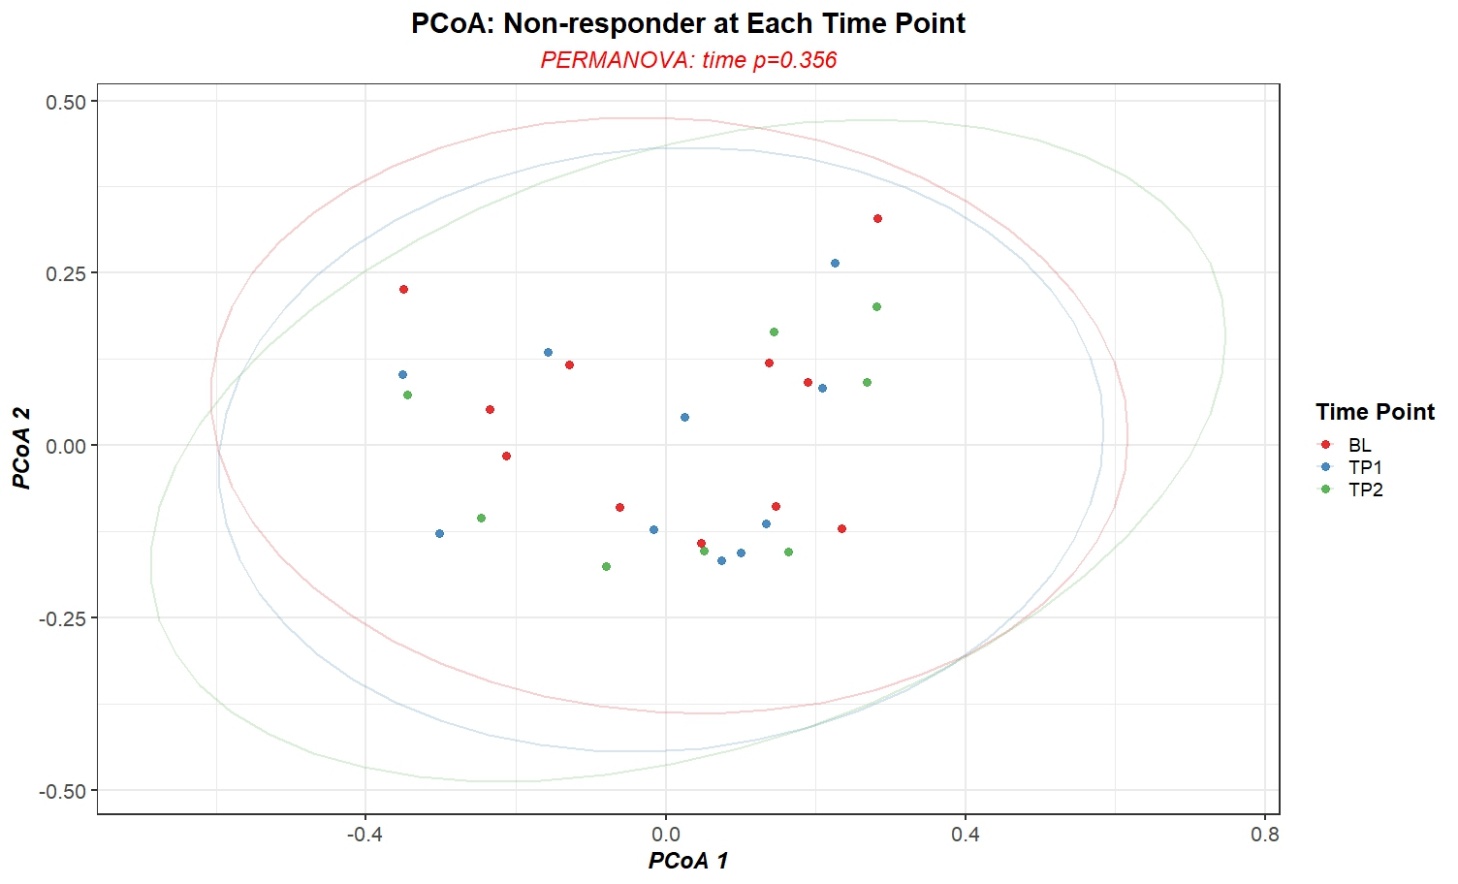* |

# Figure S11. Beta diversity PCoA plots based on Bray–Curtis distance. (A) Overall ordination plot showing the distribution of microbial community composition by time point. (B) Stratified PCoA plots at each time point (BL, TP1, TP2) comparing responders and non-responders. (C, D) Longitudinal PCoA plots illustrating temporal shifts within the responder and non-responder groups, respectively.

| **A**  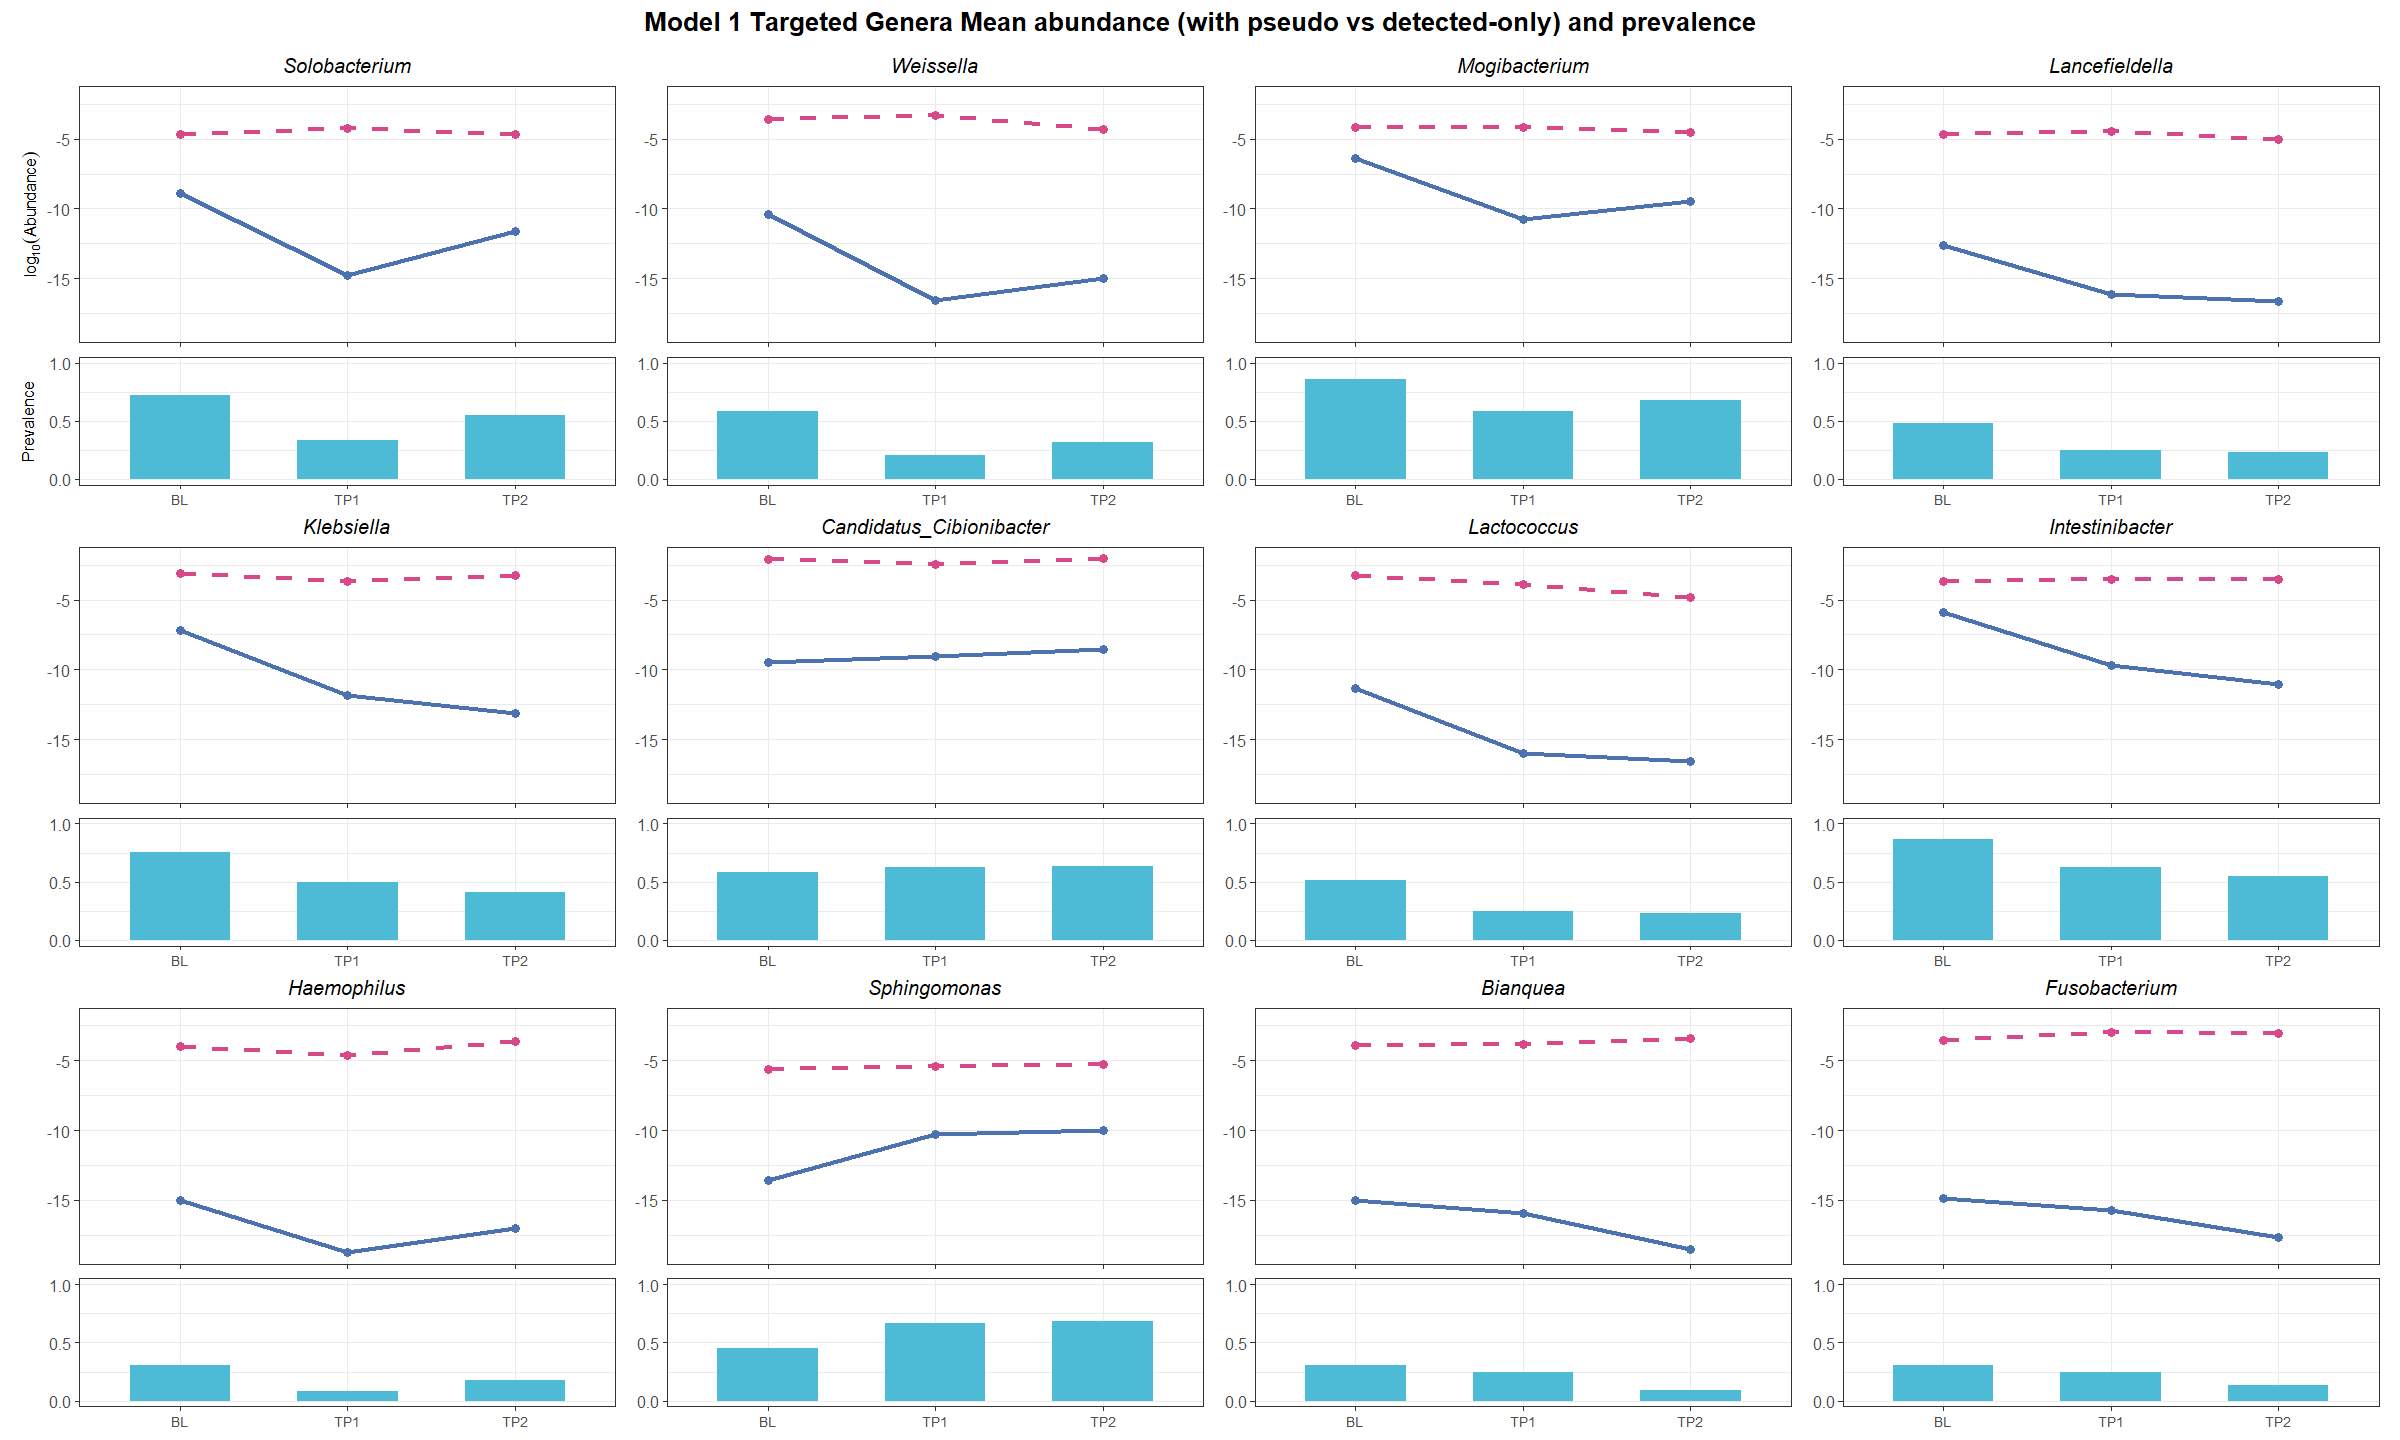 |
| --- |
| **B**  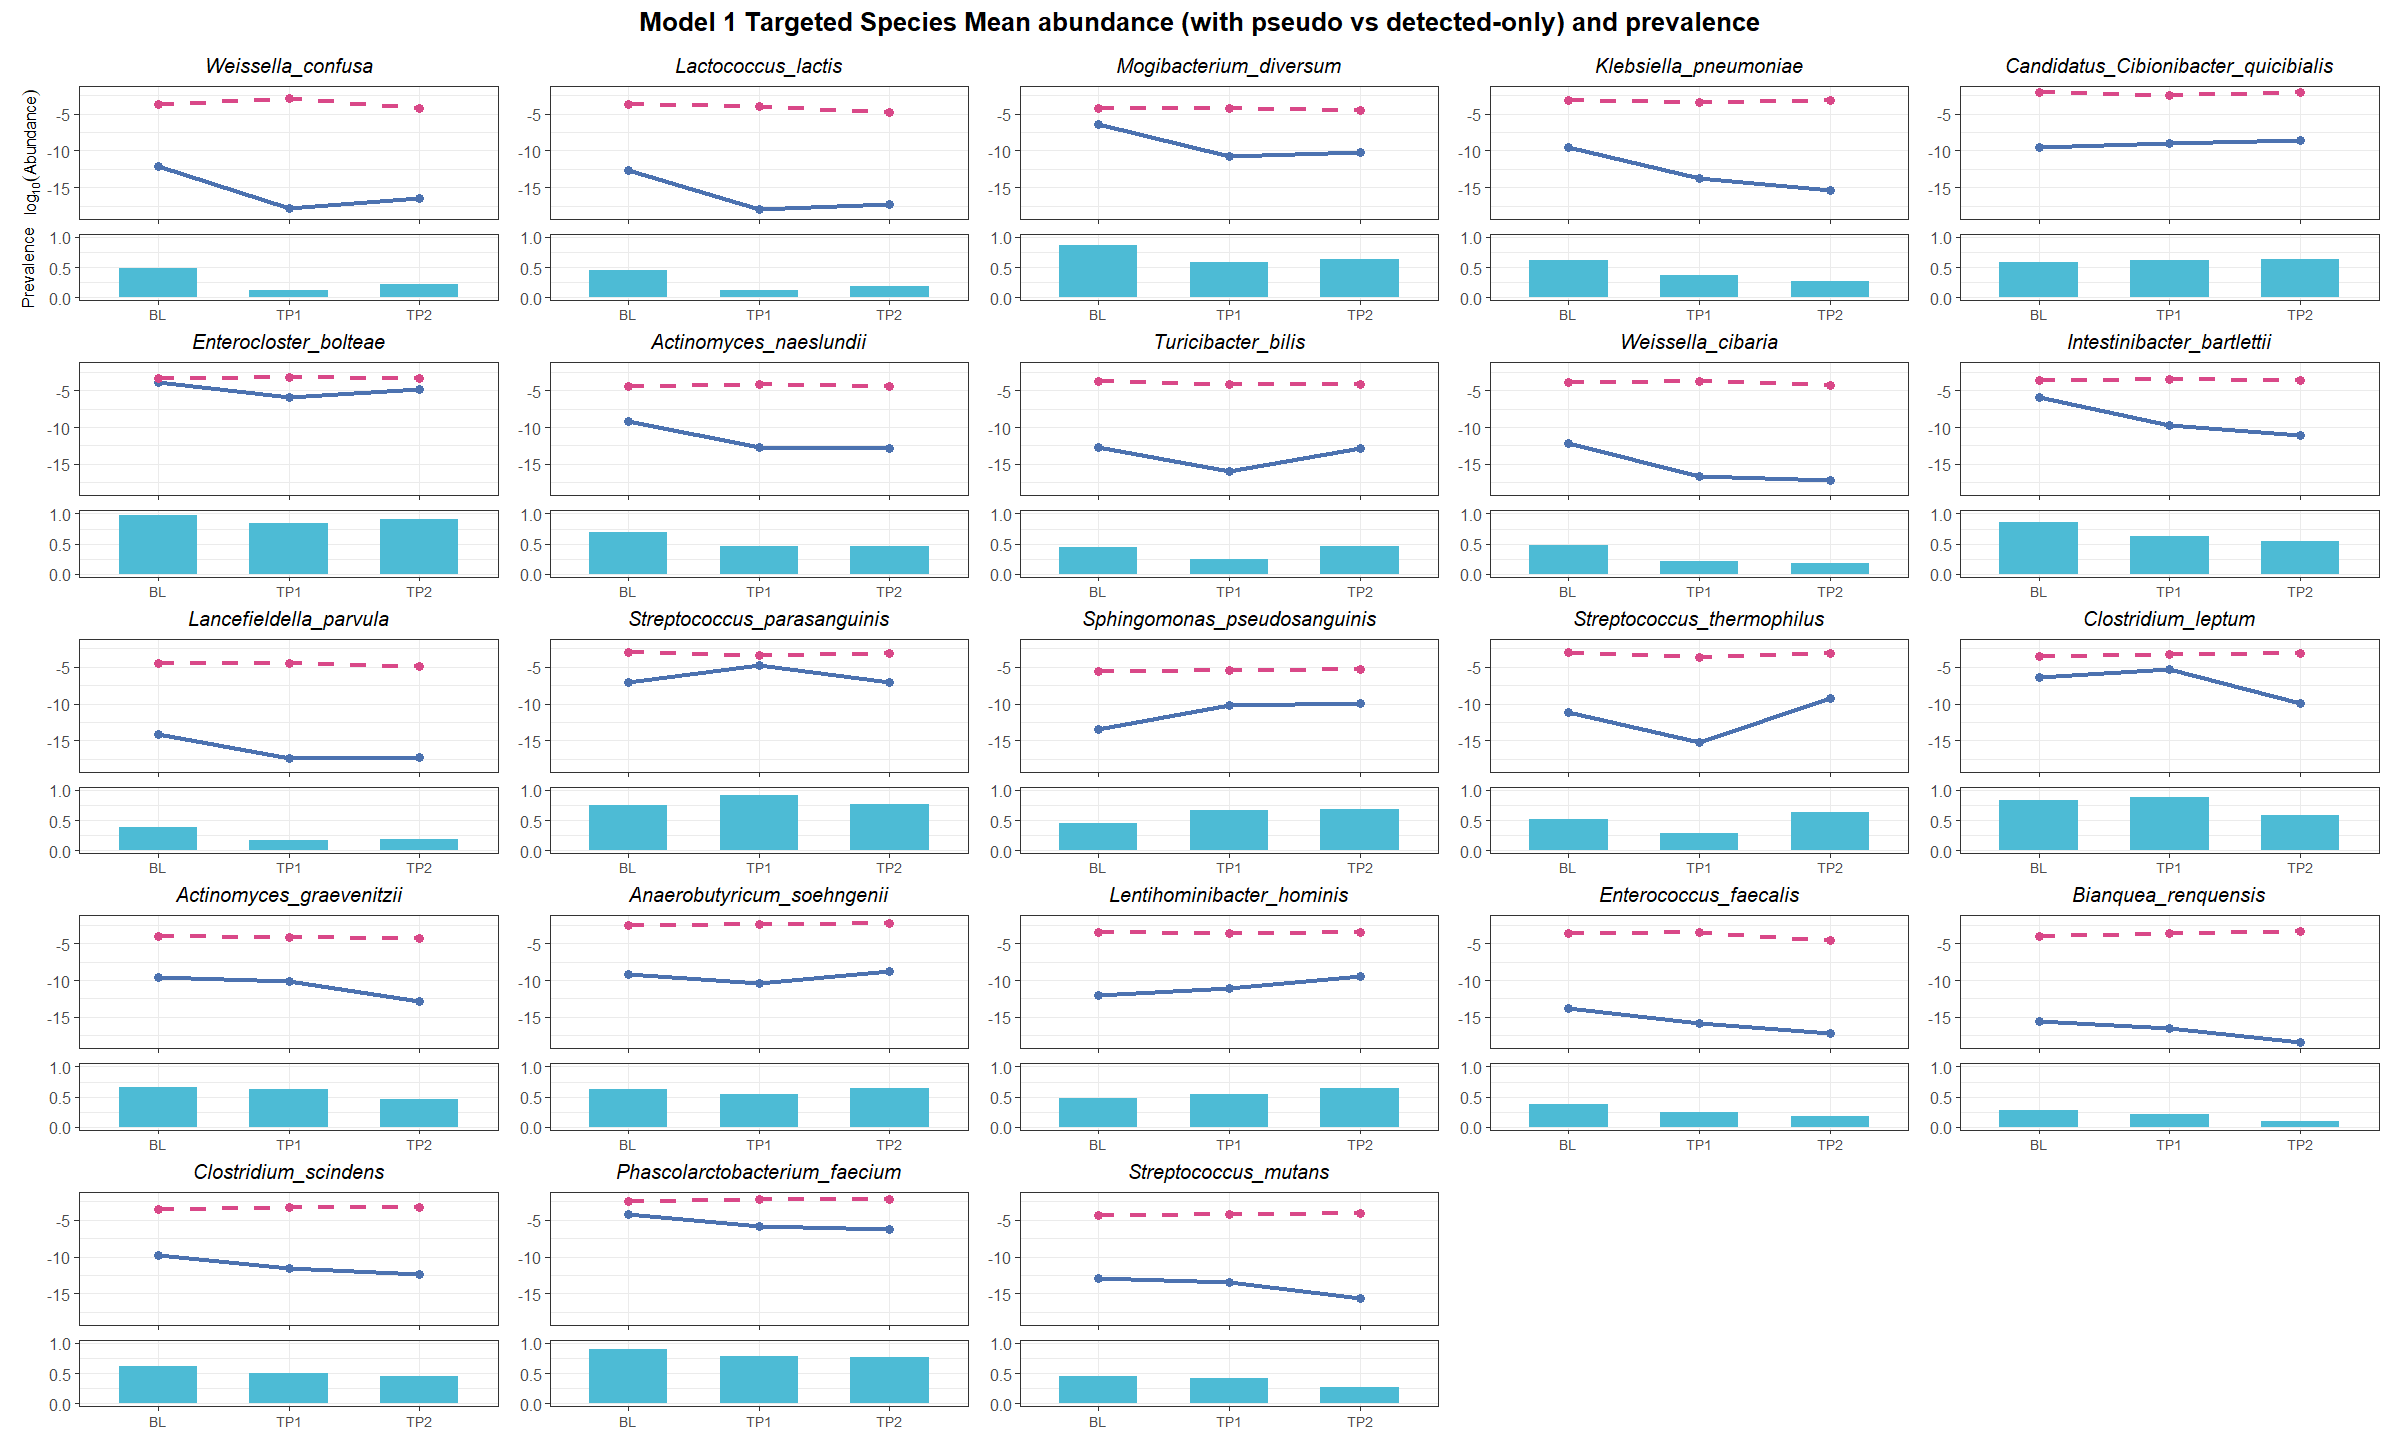 |

# Figure S12. Longitudinal trends of targeted genera and species in Model I. Each panel shows the mean log-transformed abundance (line plots) and prevalence (bar plots) of targeted genera (A) and species (B) across three time points (BL, TP1, and TP2). Solid blue lines represent abundance including zero values (pseudo-count applied), while dashed pink lines represent abundance calculated from detected-only samples (excluding zeros). The prevalence bars indicate the proportion of samples in which each taxon was detected at each time point.

| **A**  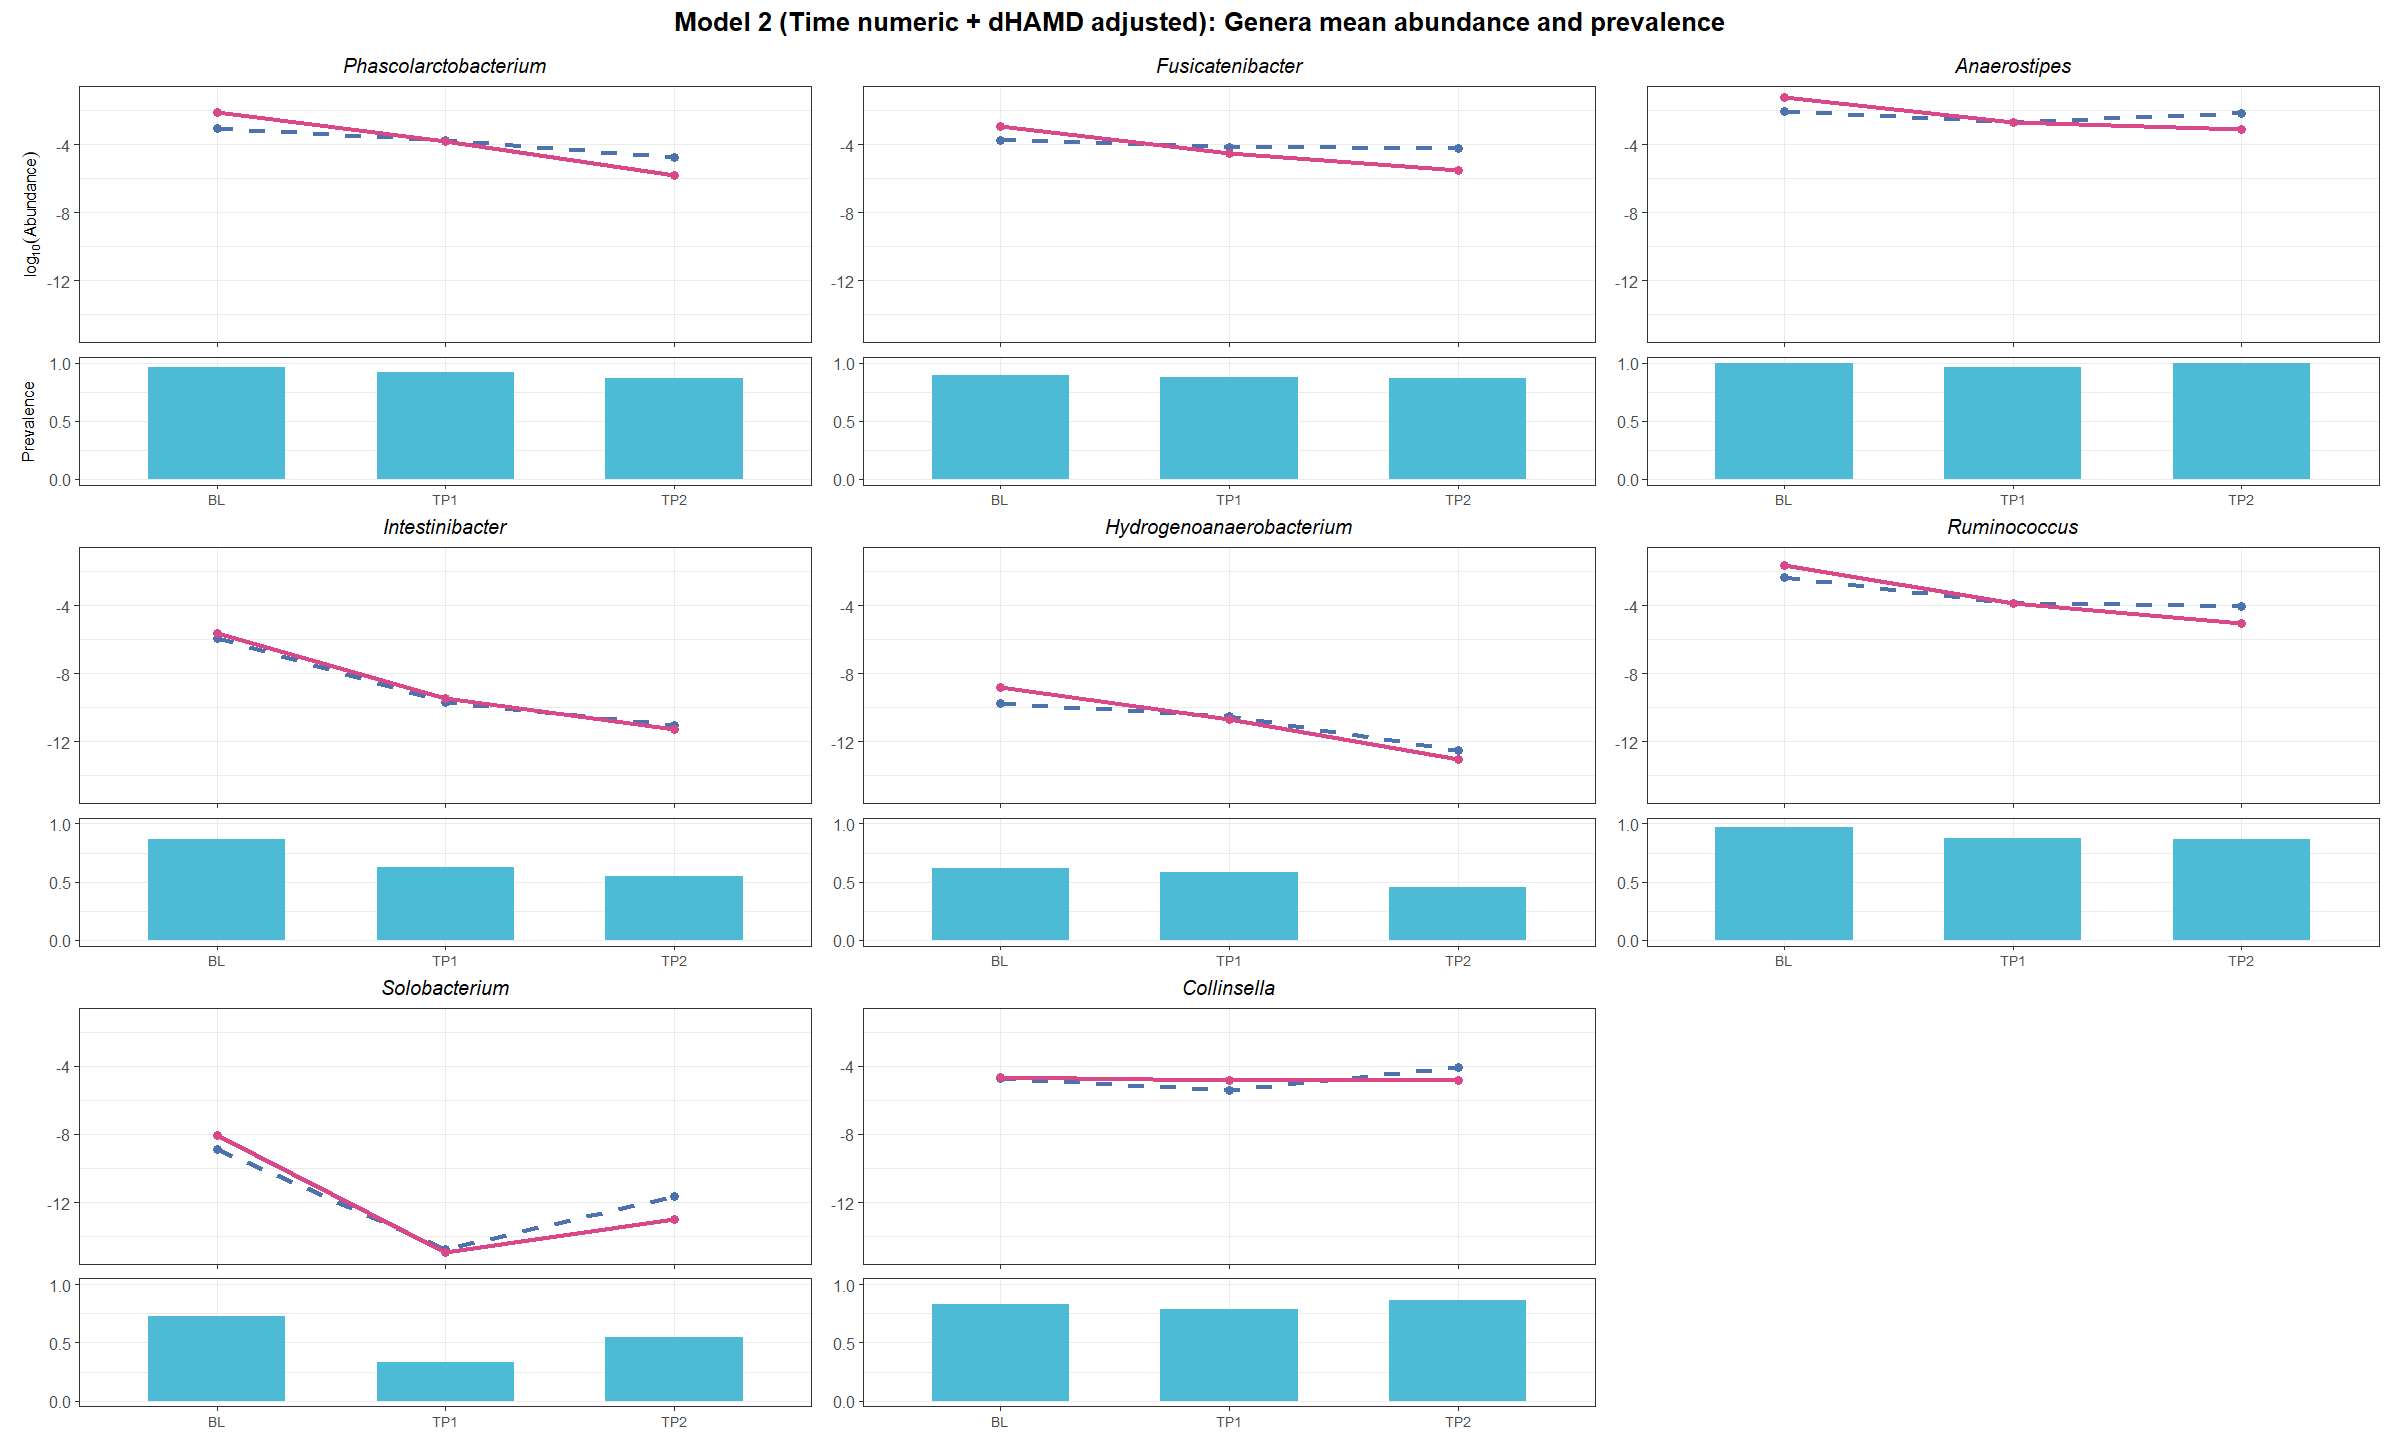 |
| --- |
| **B**  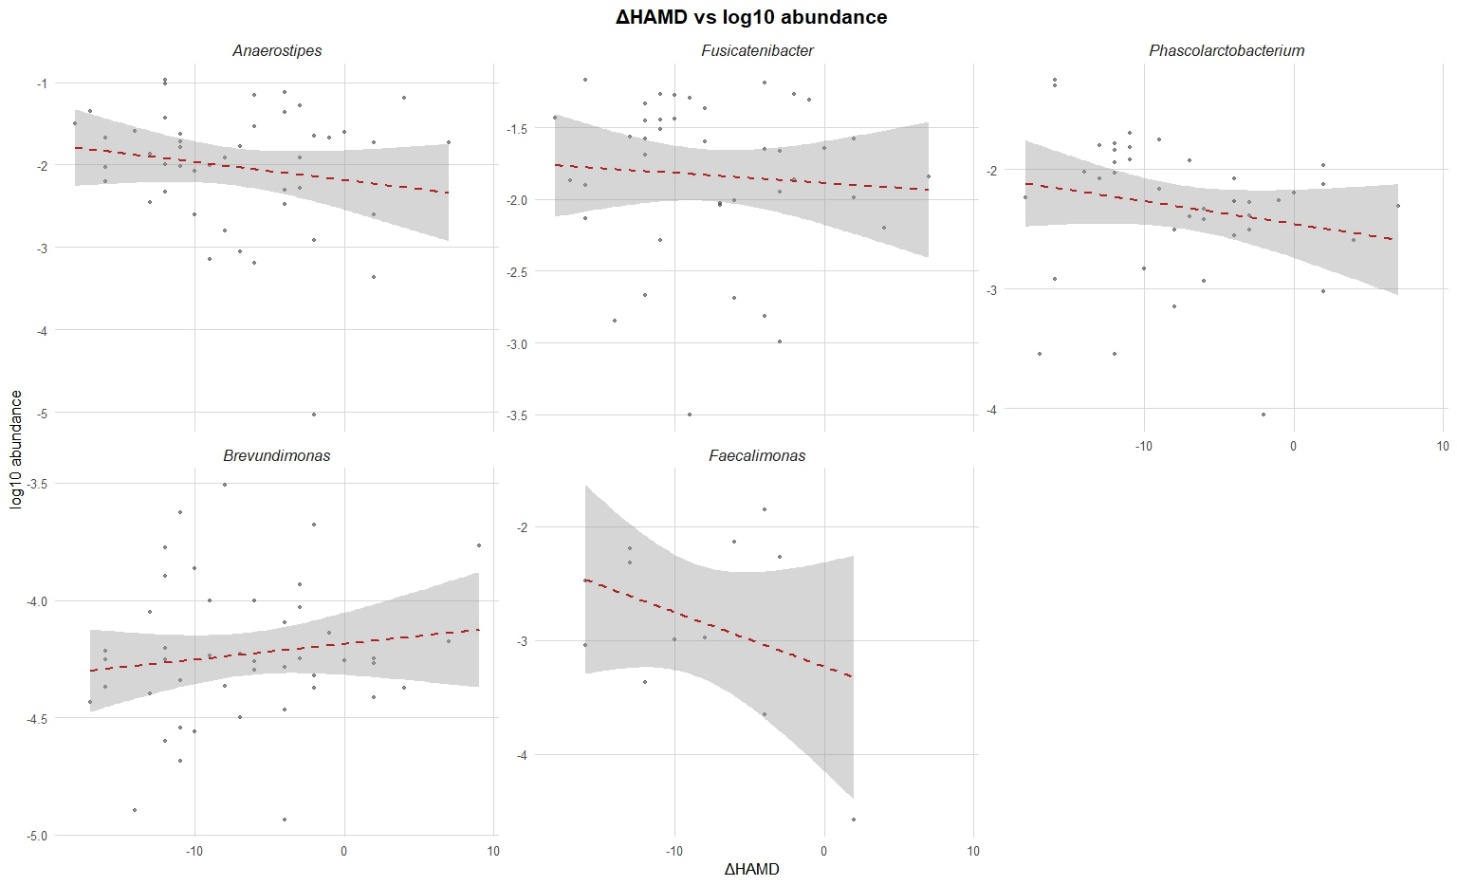 |
| **C**  *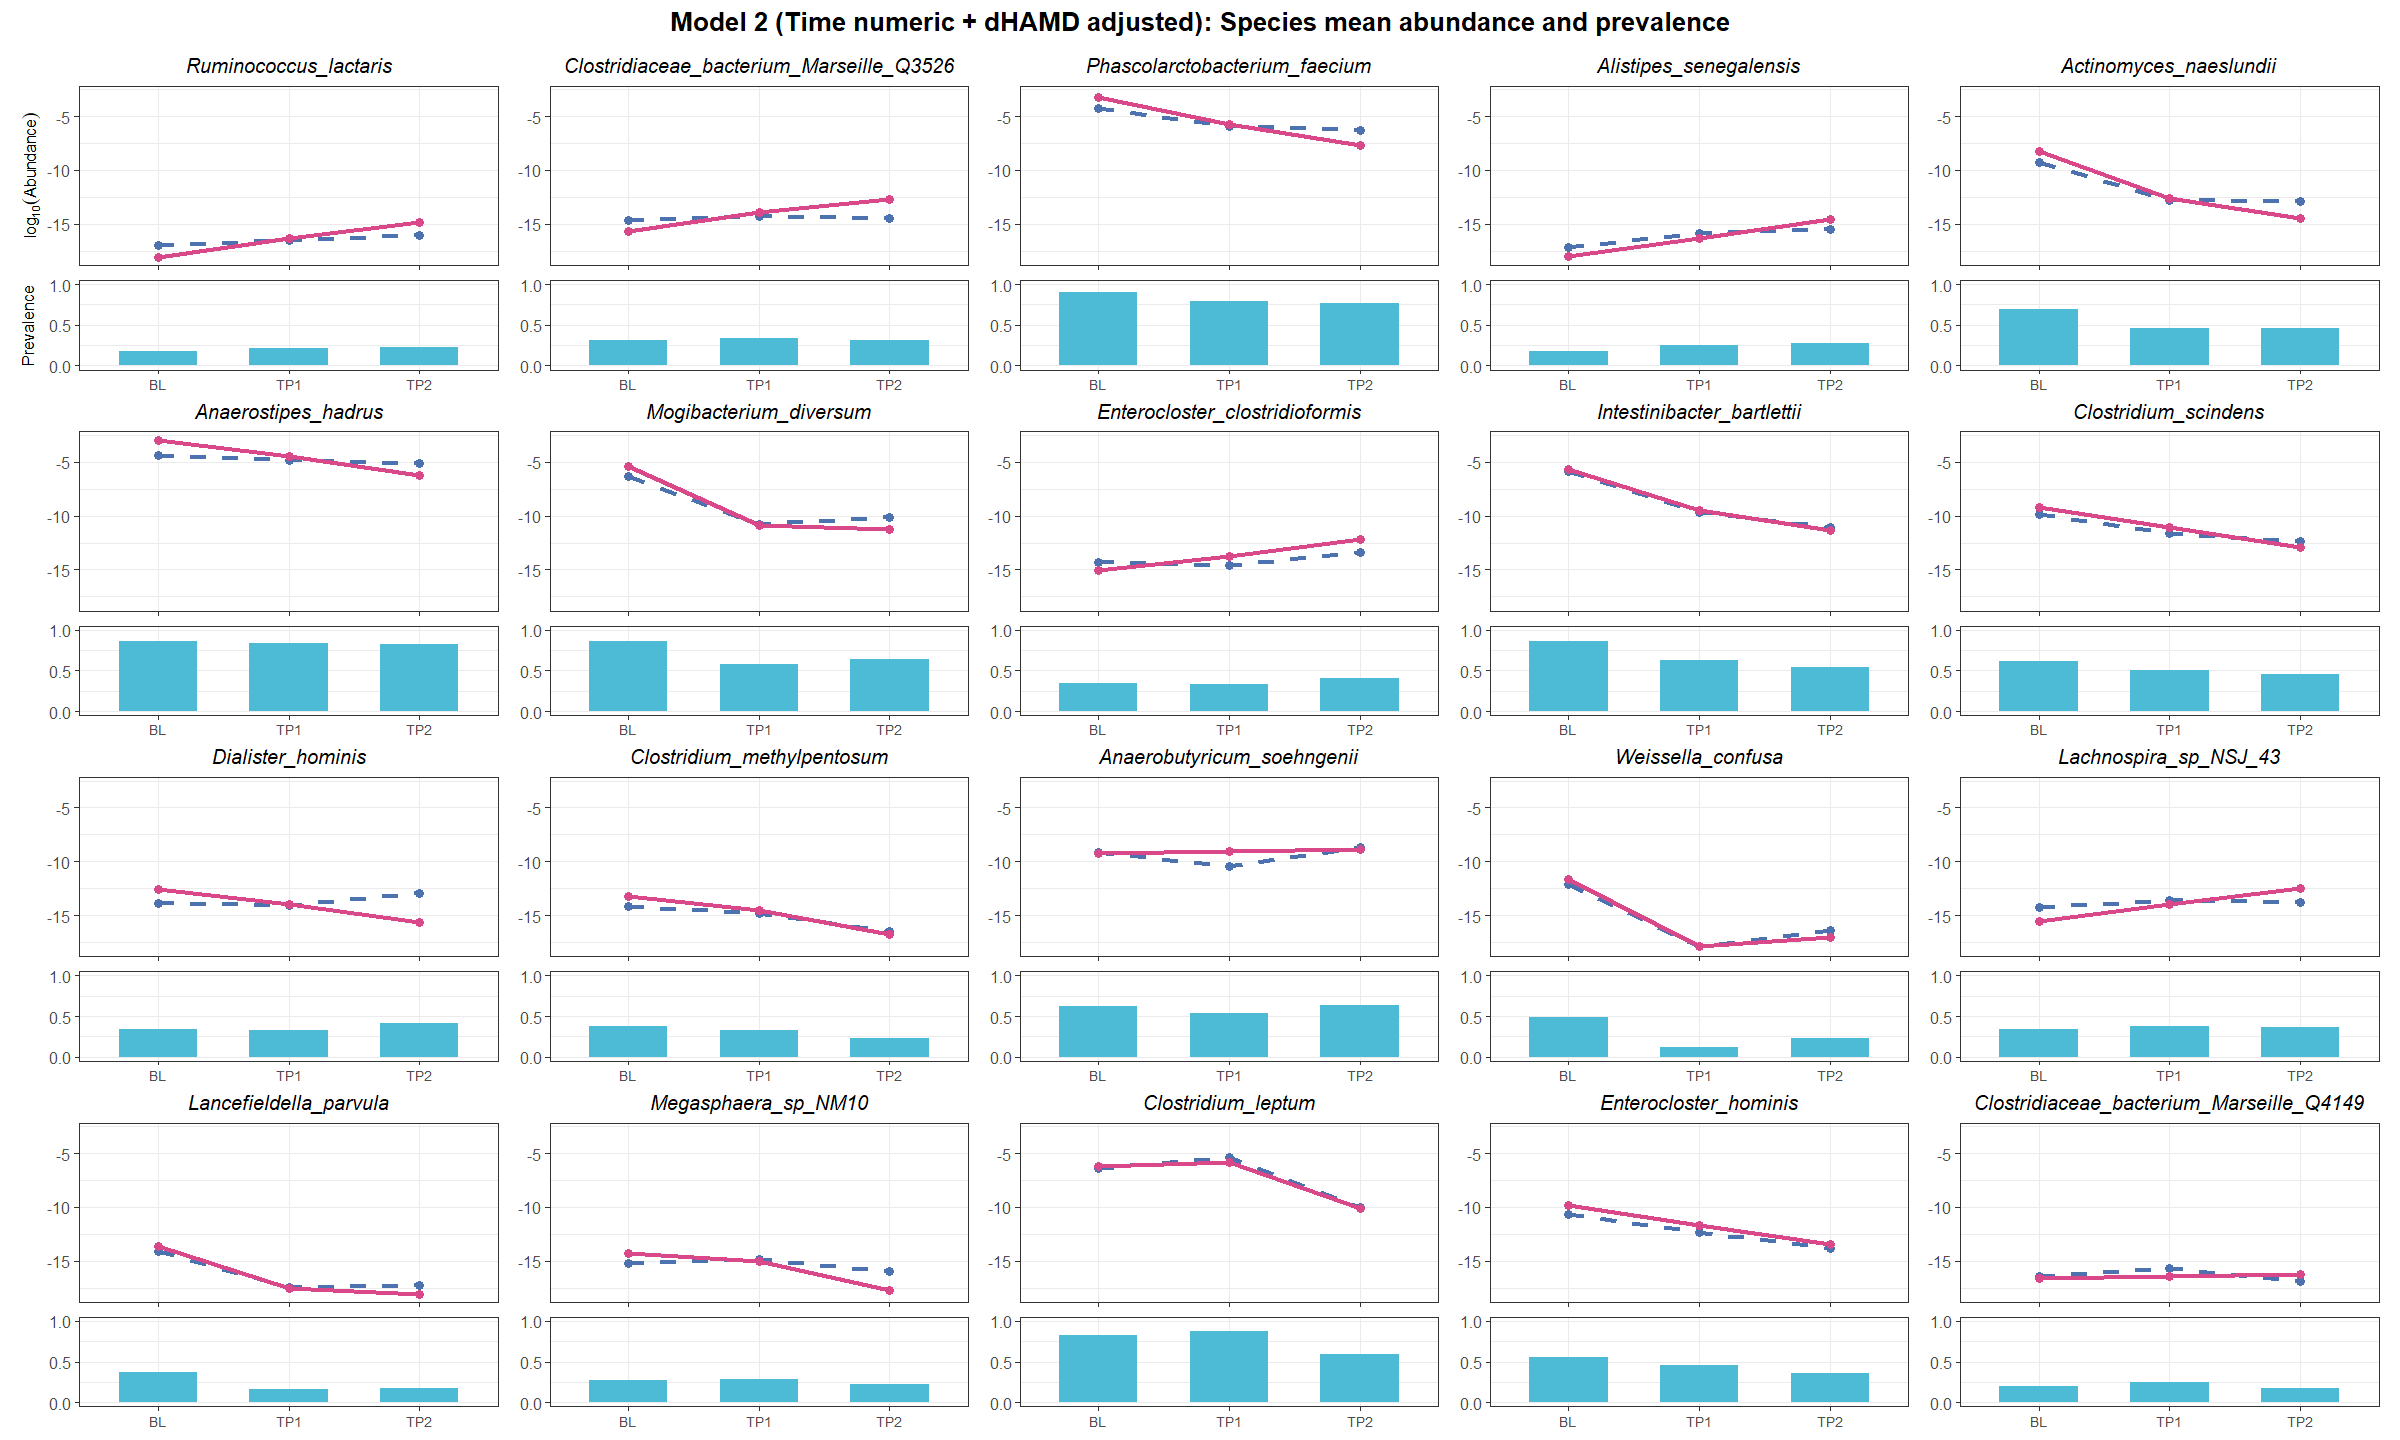* |
| **D**  *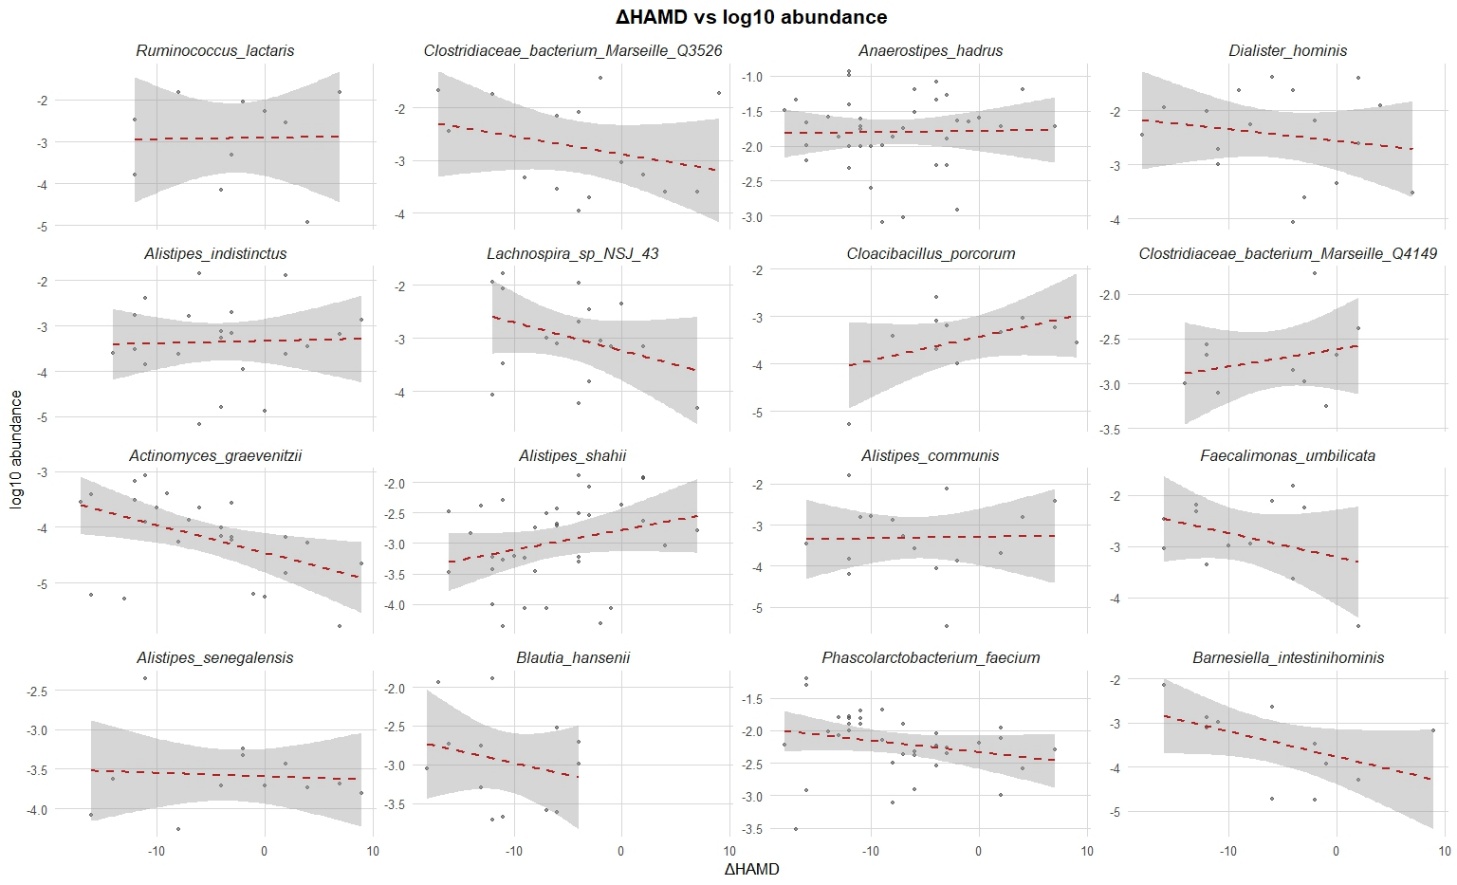* |

# Figure S13. Targeted genera and species associations from Model II (time + ΔHAMD adjusted). (A, C) Mean log-transformed abundance (solid blue lines: including zero values; dashed pink lines: detected-only samples) and prevalence (bar plots) of genera / species significantly associated with time in Model II. (B, D) Scatter plots showing correlations between ΔHAMD and log₁₀-transformed abundances of selected genera / species.

| **A**  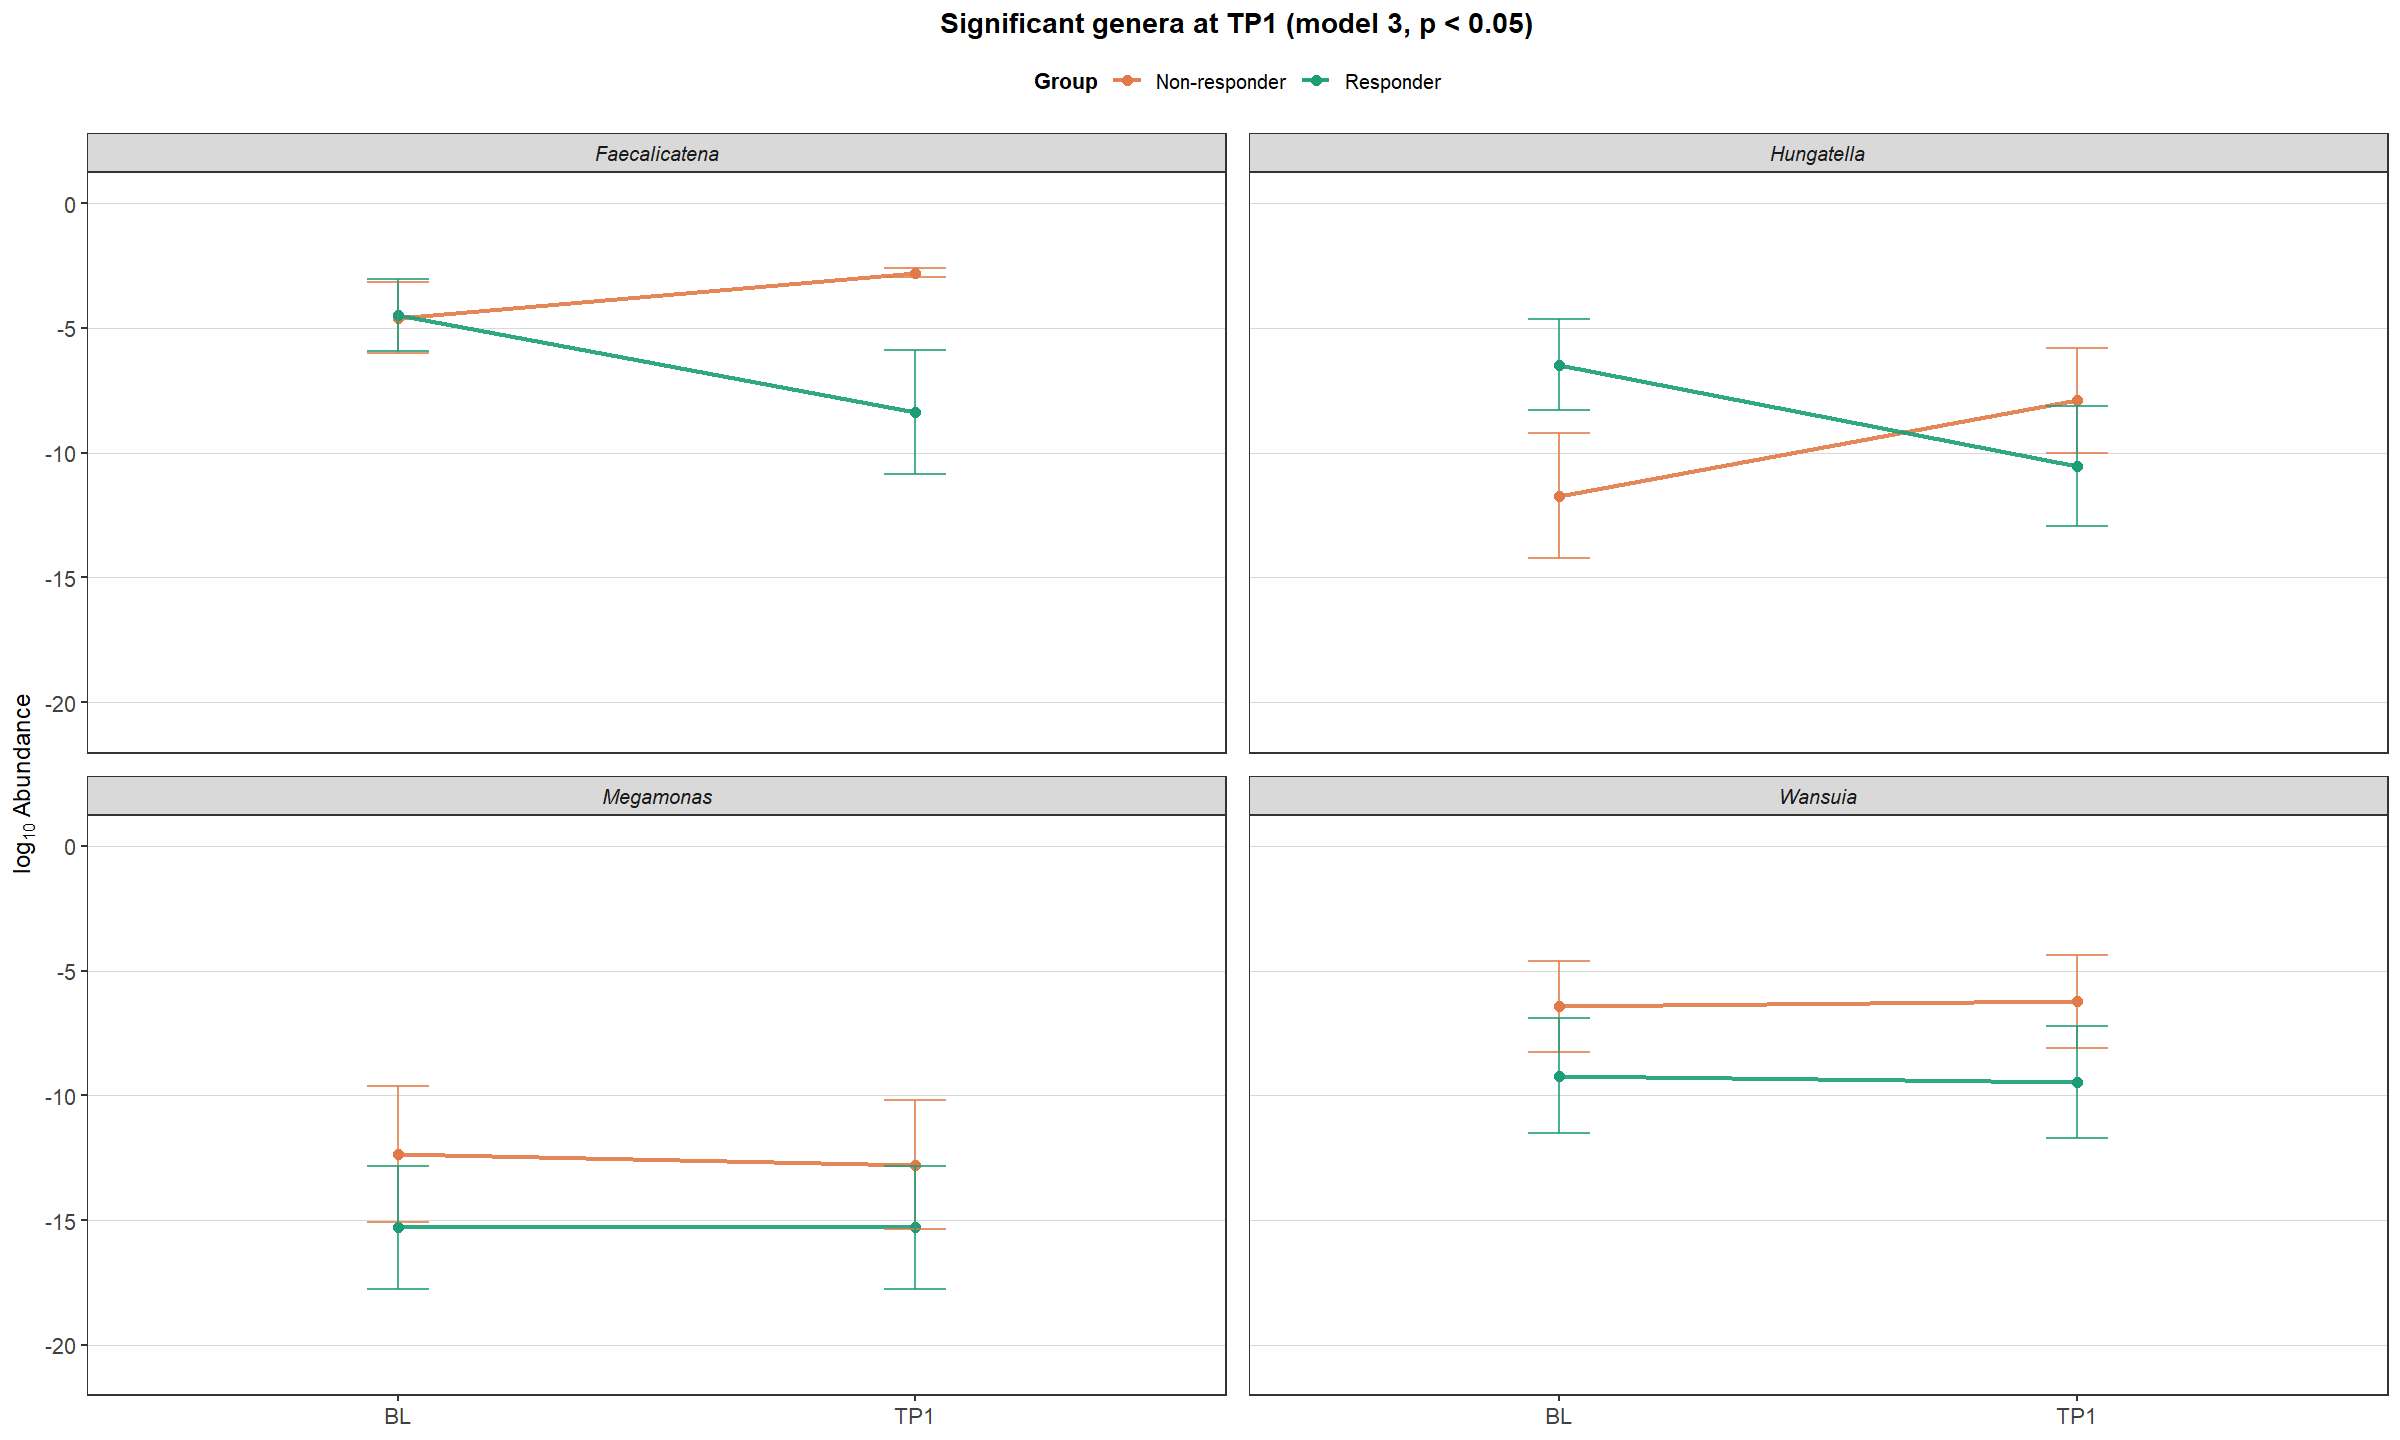 |
| --- |
| **B**  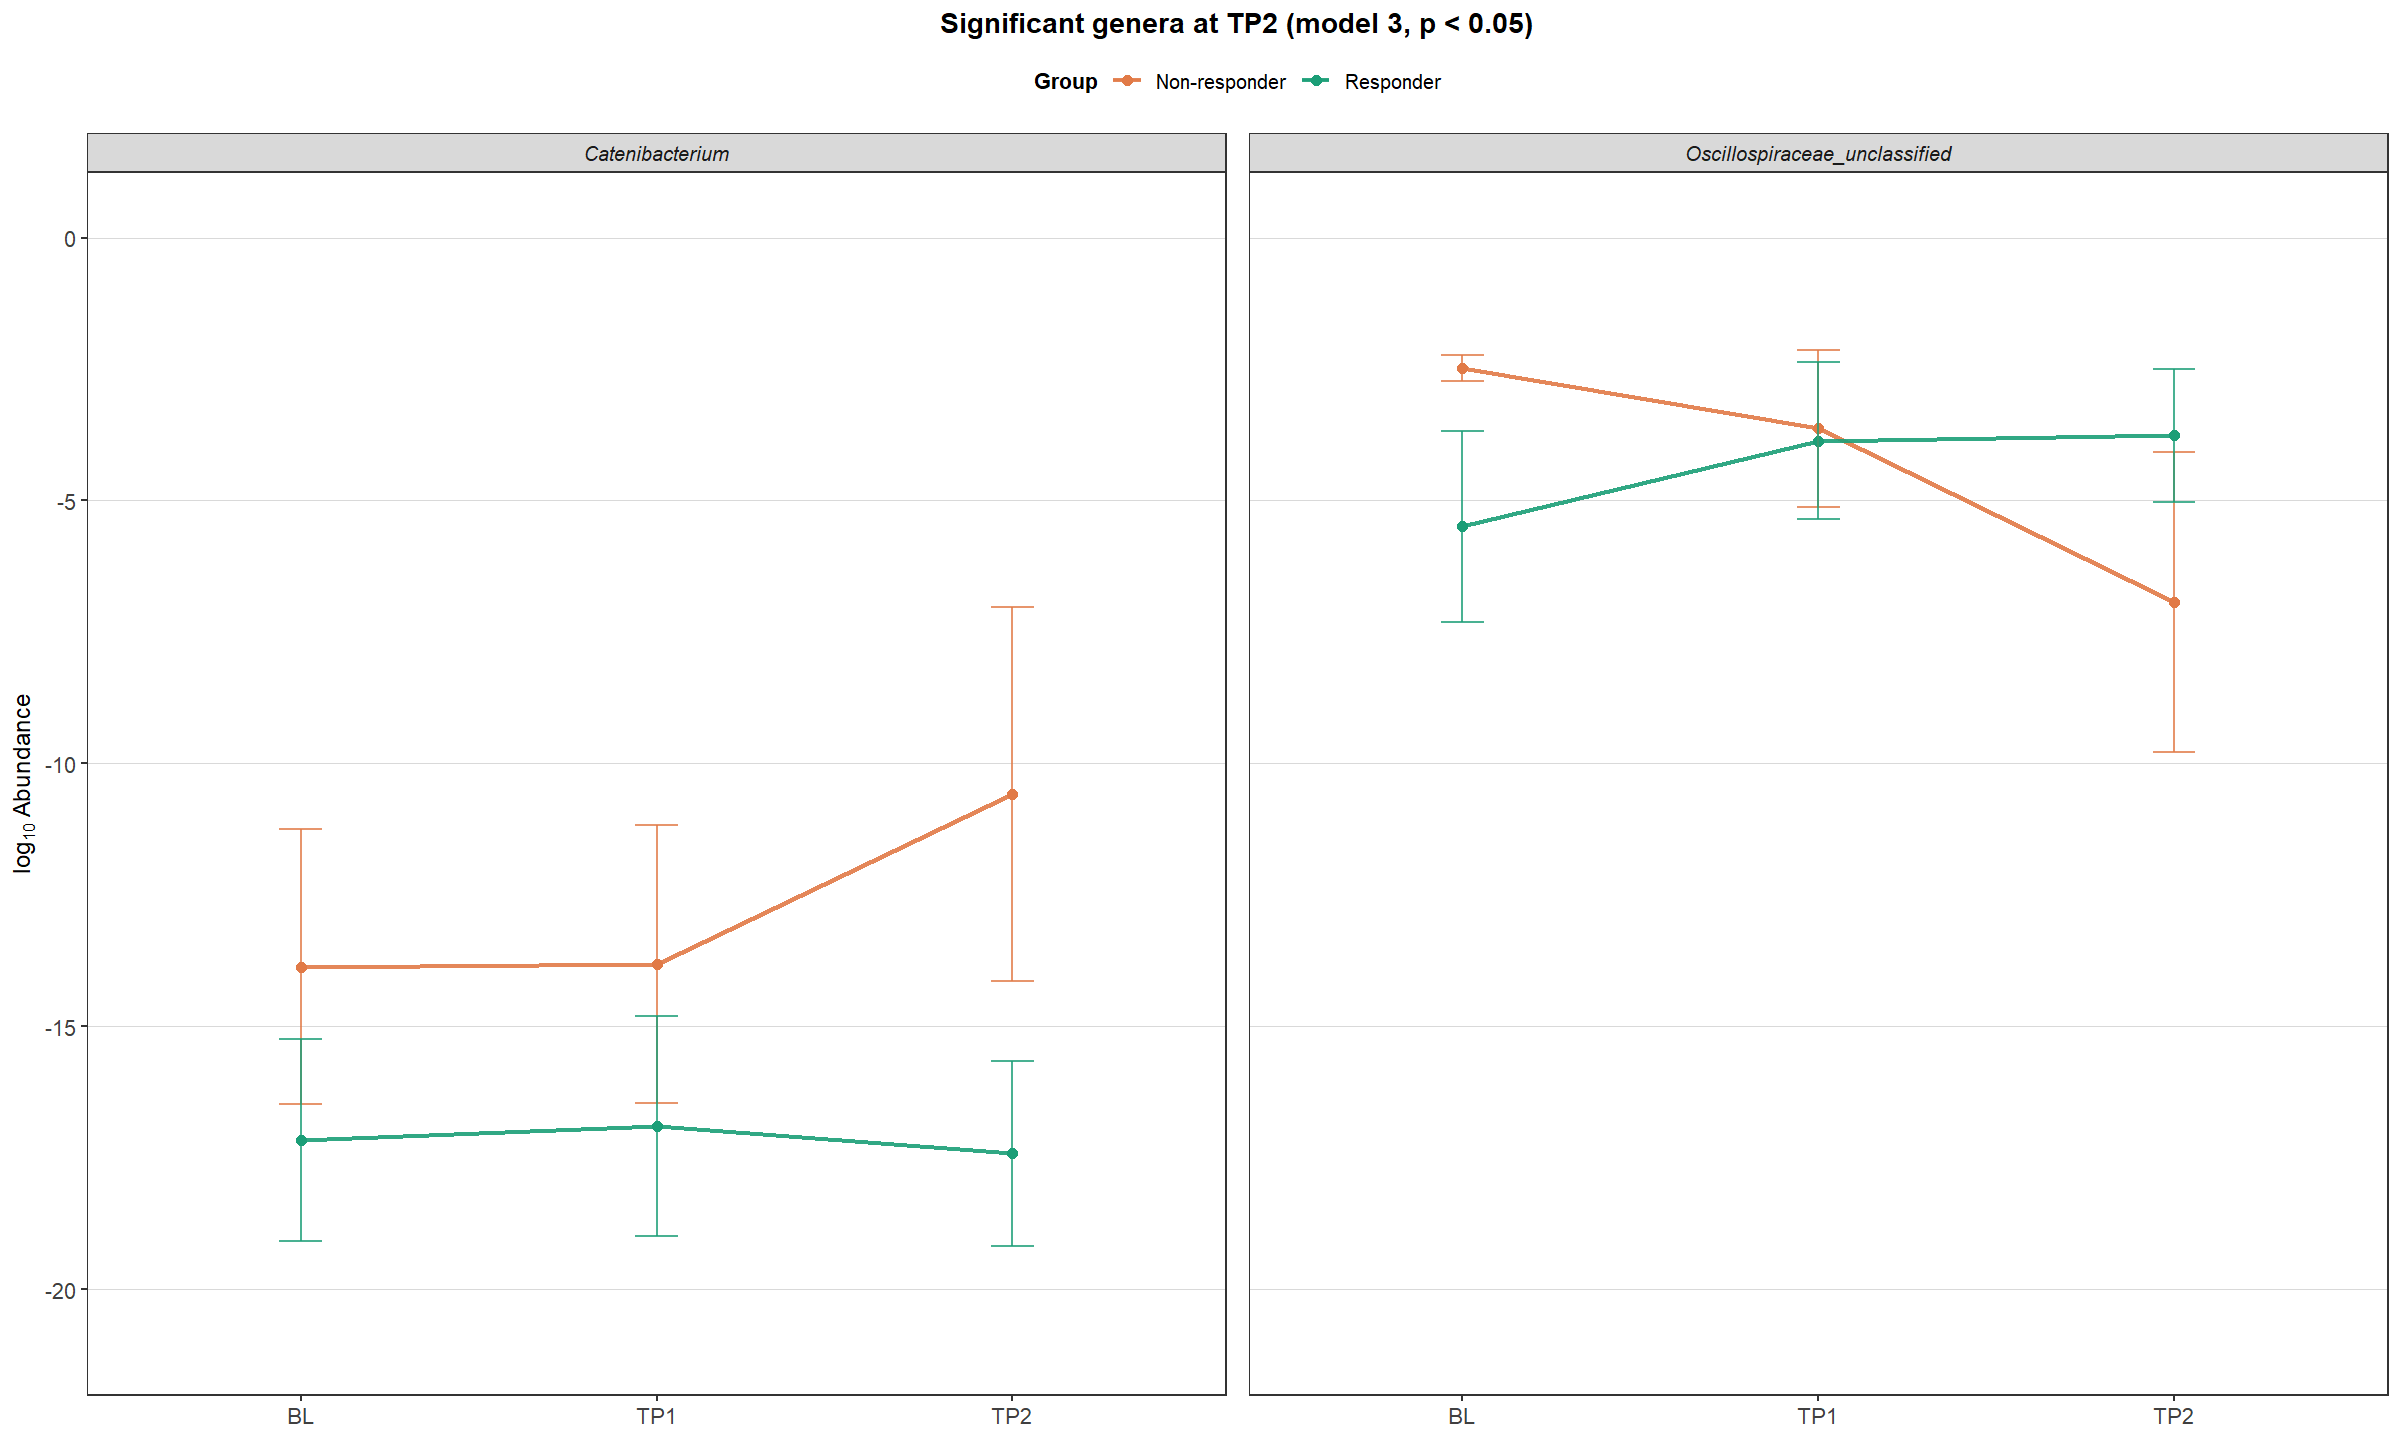 |
| **C**  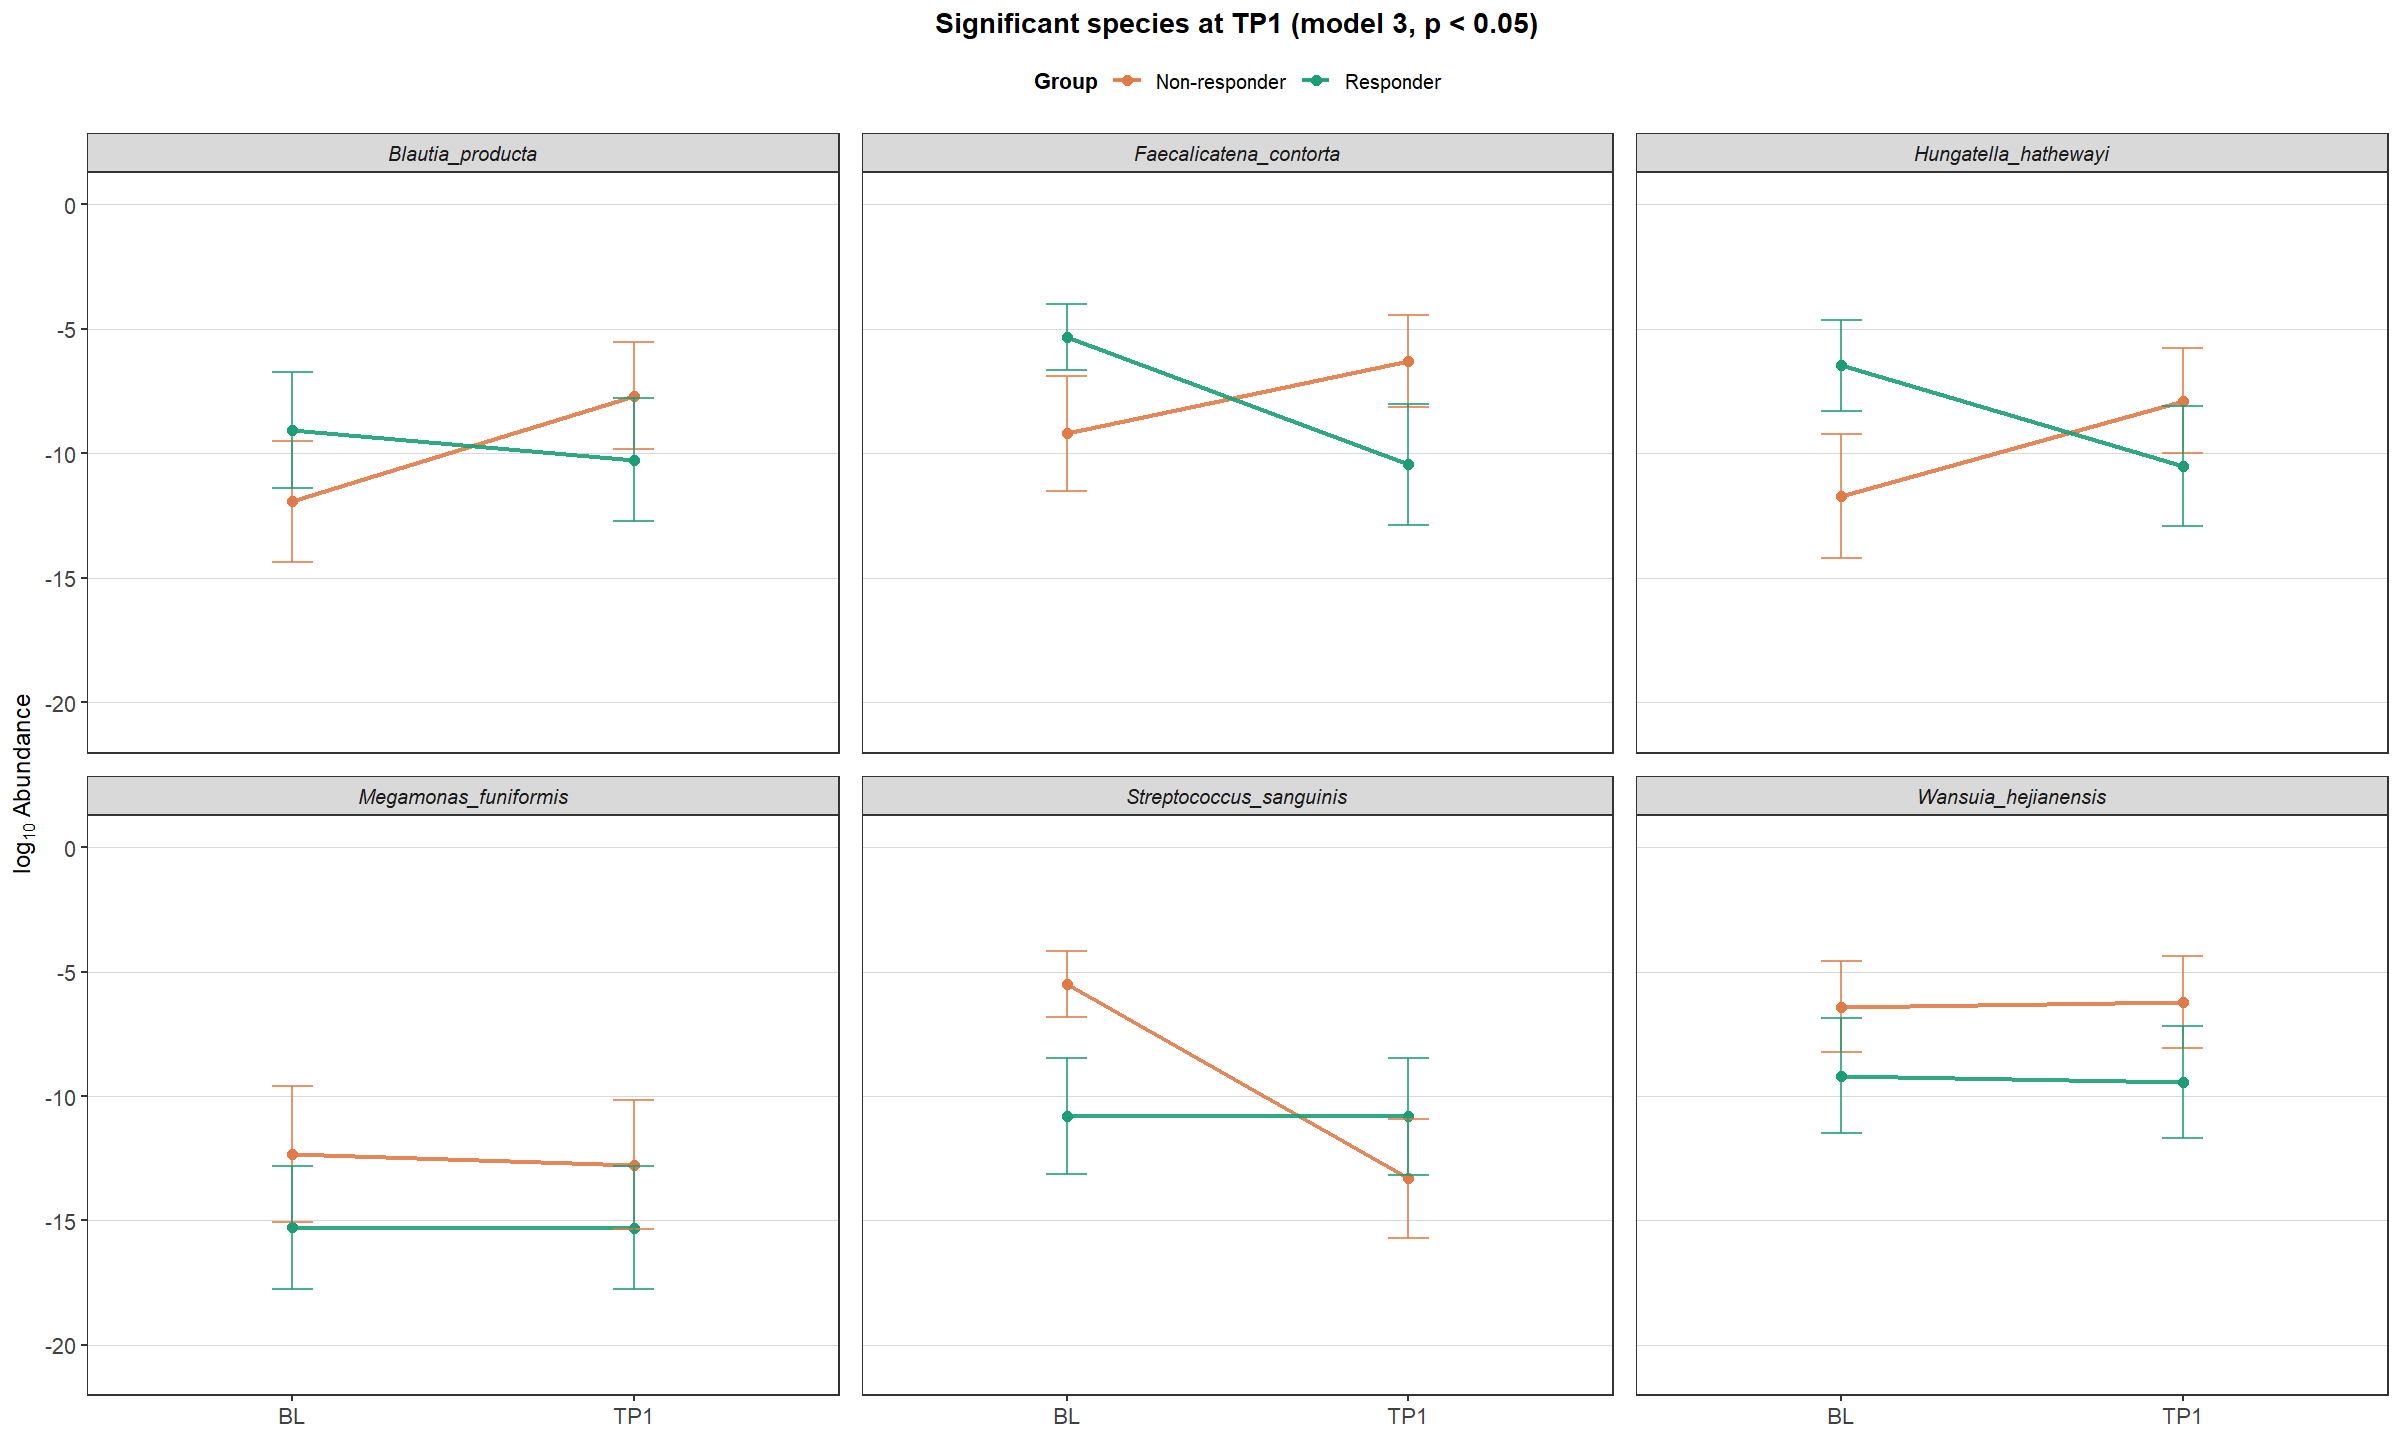 |
| **D**  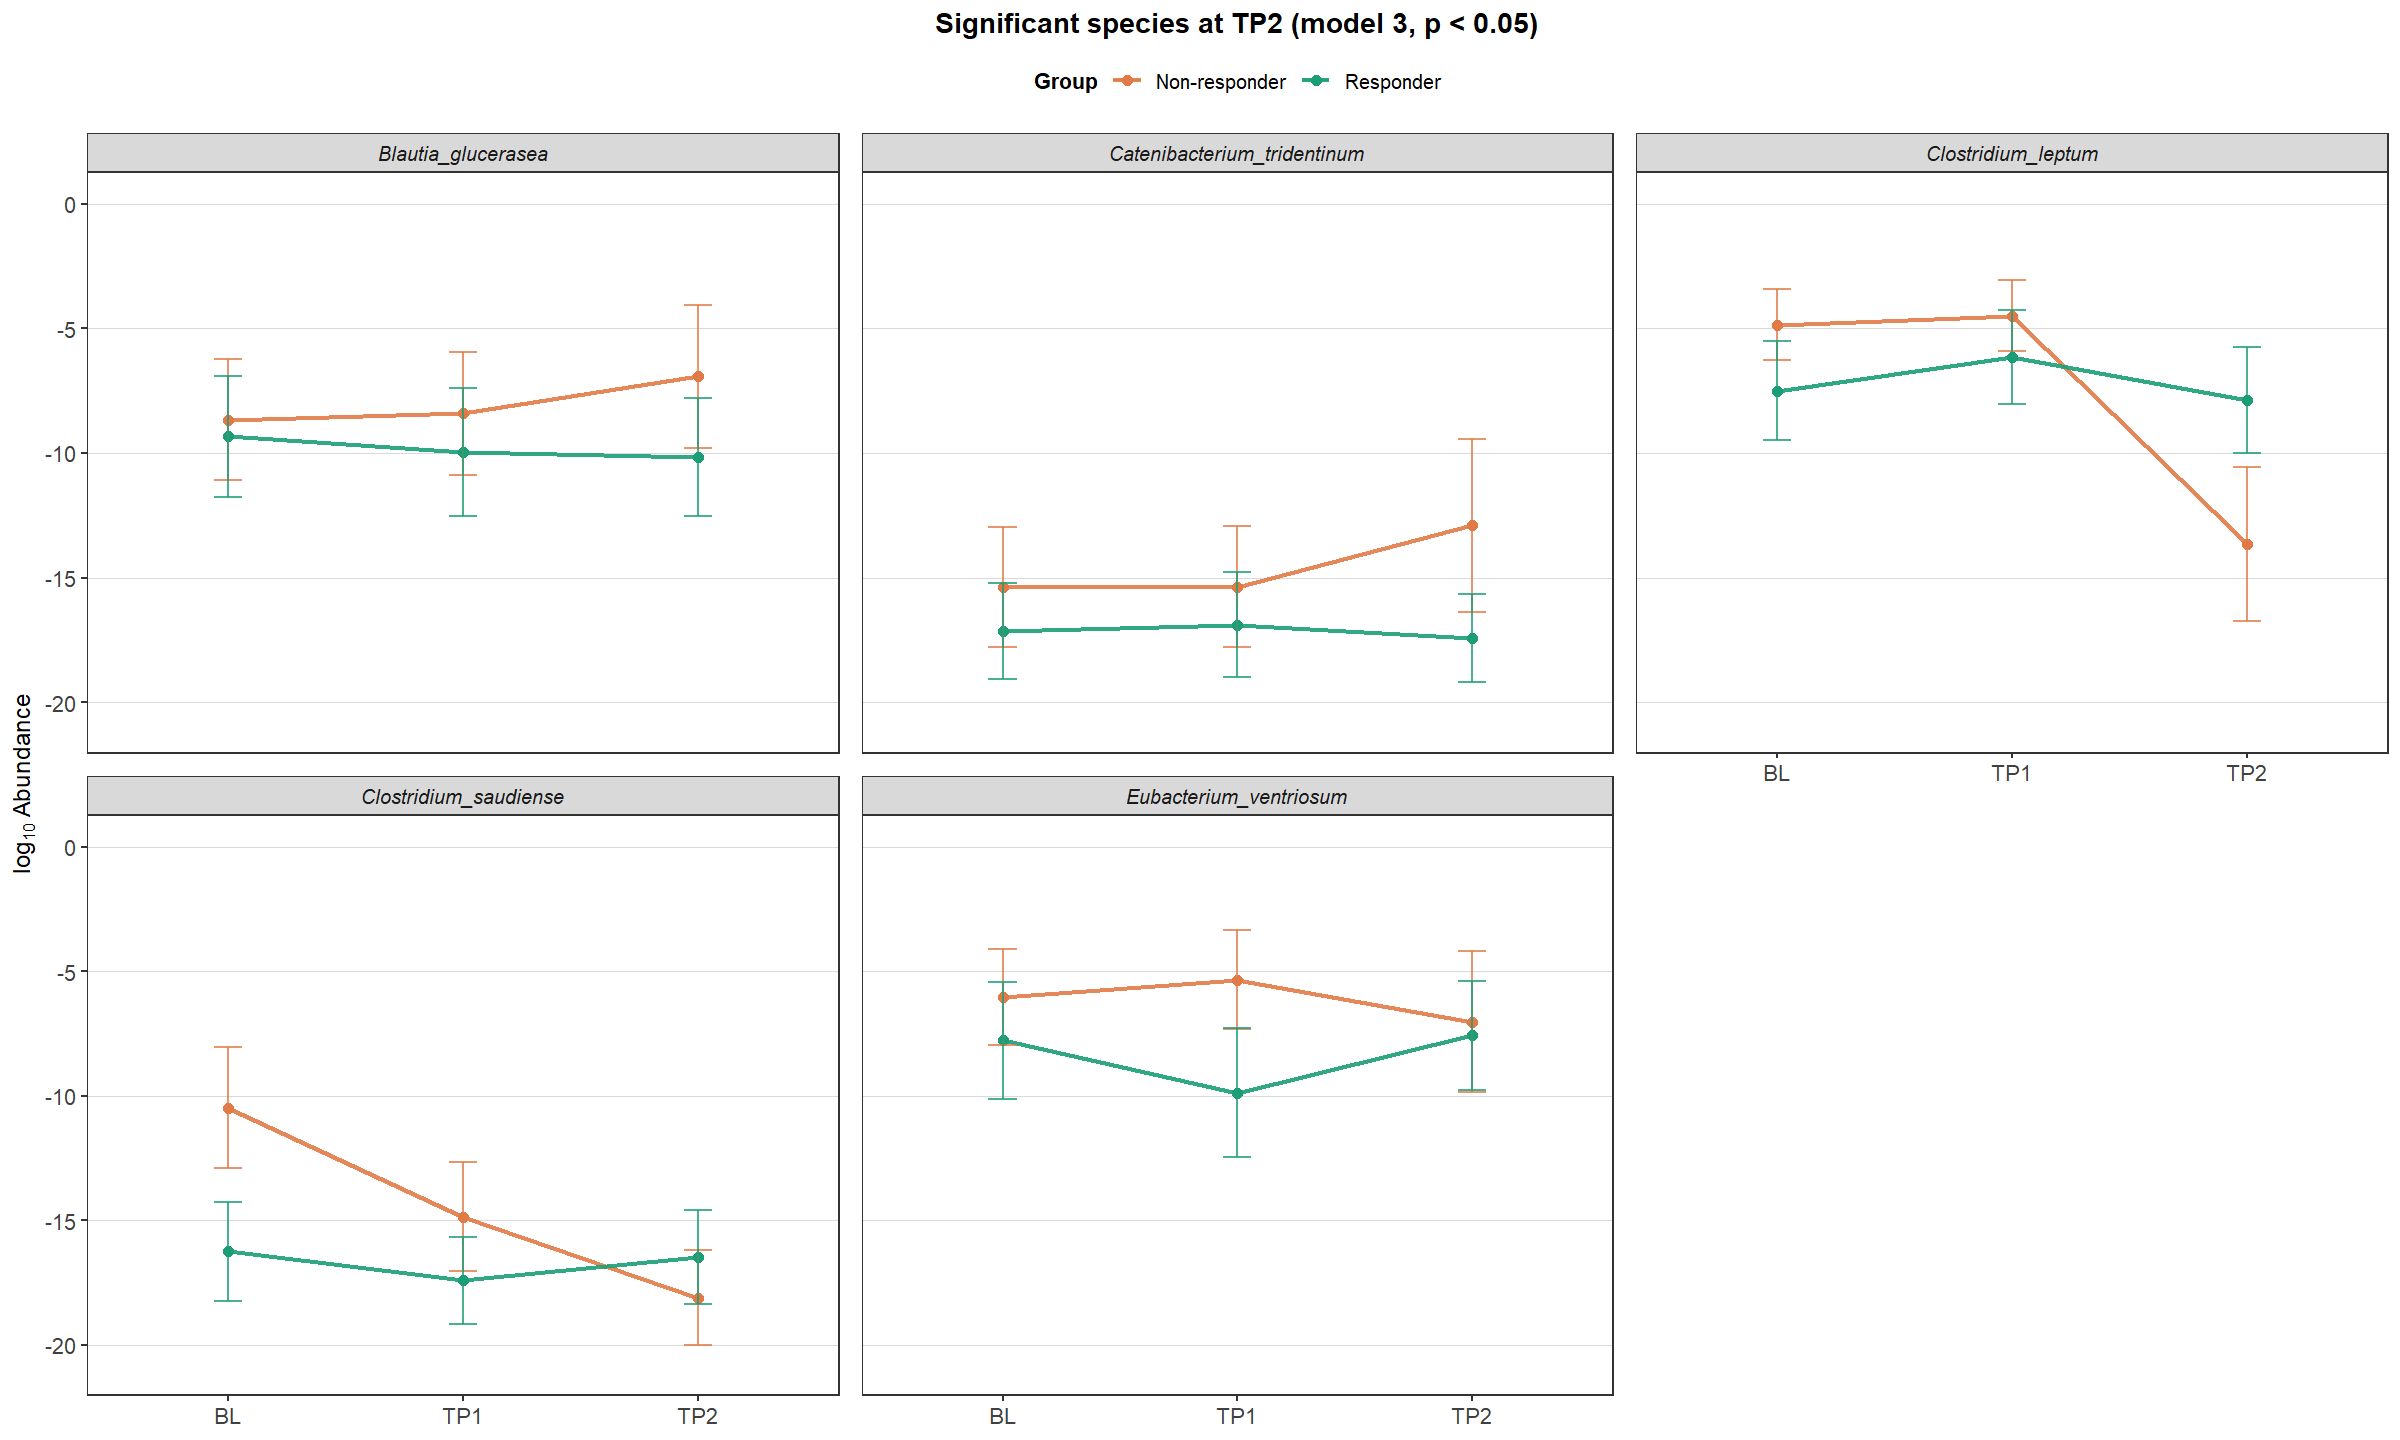 |

# Figure S14. Differentially abundant genera and species identified in Model III. The figure shows genera (A–B) and species (C–D) that displayed significant group-by-time interactions (p < 0.05) between responders and non-responders. The response group was defined at each corresponding time point rather than treated as a fixed classification across the entire follow-up period.

| A 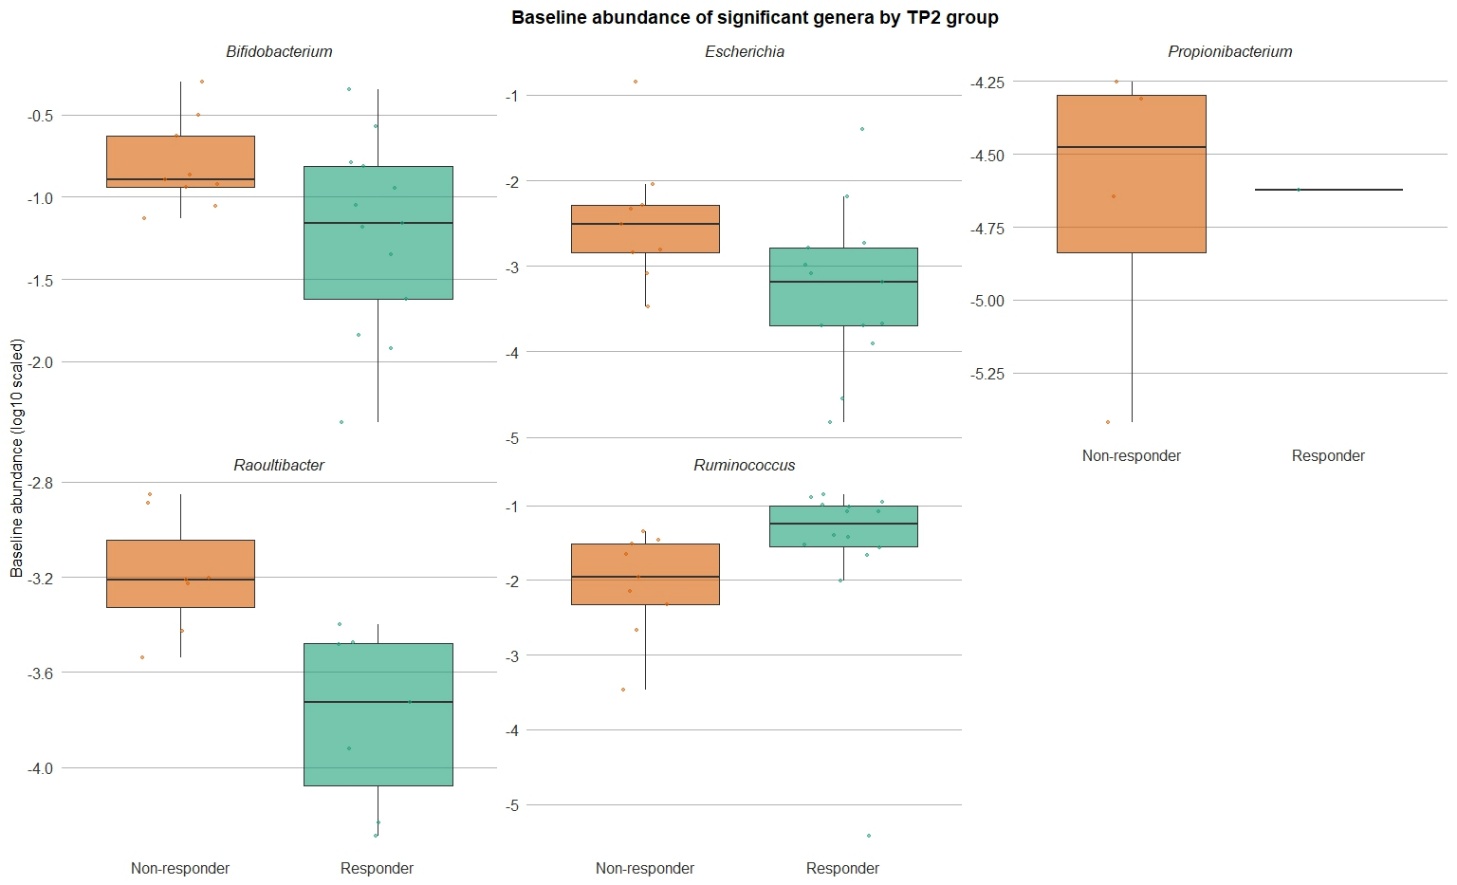 |
| --- |
| B *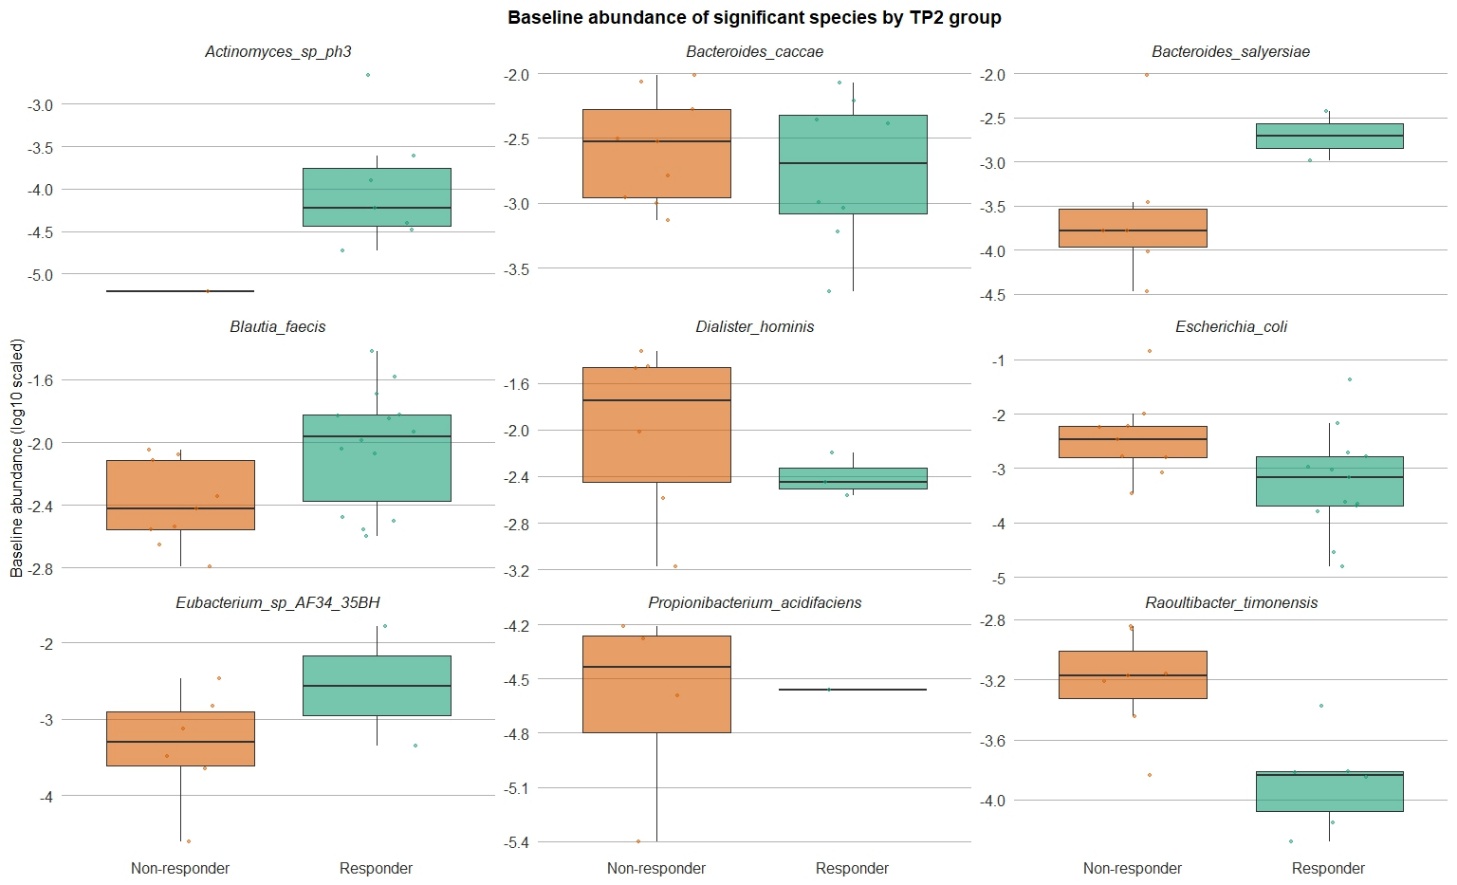* |

# Figure S15. Differential baseline abundance of targeted genera and species identified in Model IV. The figure shows baseline (BL) abundances of genera (A) and species (B) that were significantly associated with treatment response group (Responder vs. Non-responder). Group classification was defined based on the response status at TP2. Boxplots represent log₁₀-transformed relative abundance values at baseline, compared between participants who were later classified as responders or non-responders.

| **A**  *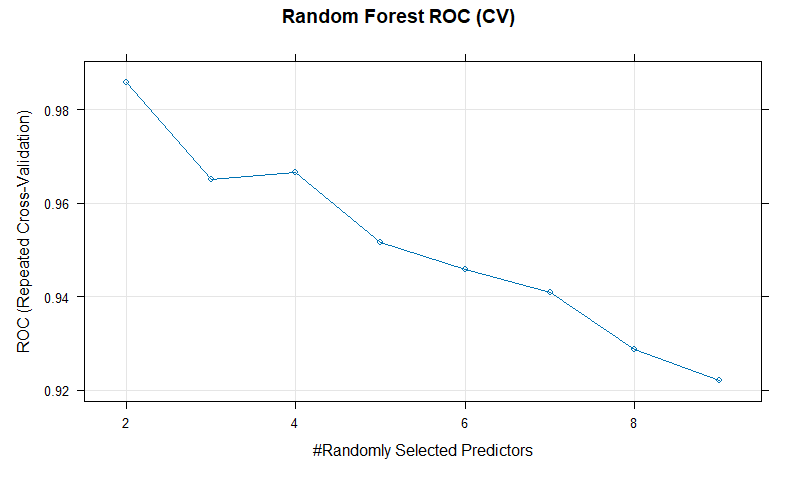* |
| --- |
| **B**  *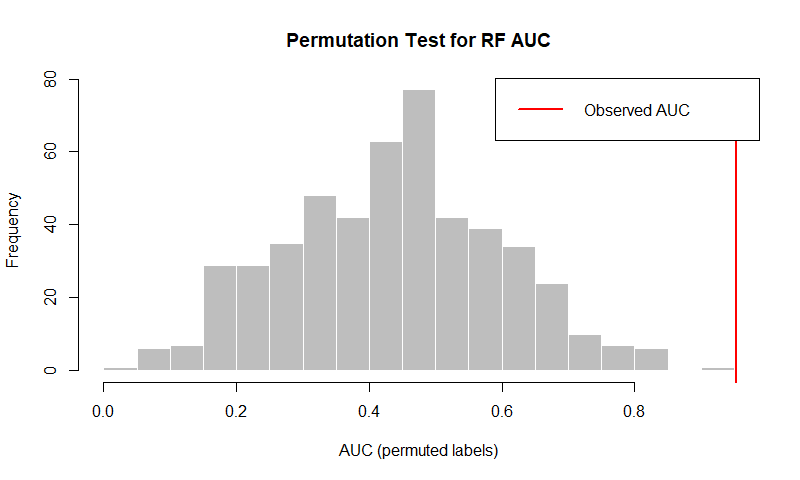* |

# Figure S16. Random forest model for baseline species predicting treatment response. Group classification (Responder vs. Non-responder) was defined based on treatment outcome at TP2. (A) Random forest cross-validation results showing mean ROC values across models with different numbers of randomly selected predictors. (B) Permutation test of the random forest model’s AUC performance, where the observed AUC (red line) is compared against the null distribution of AUC values generated from 500 permutations.

| **A**  **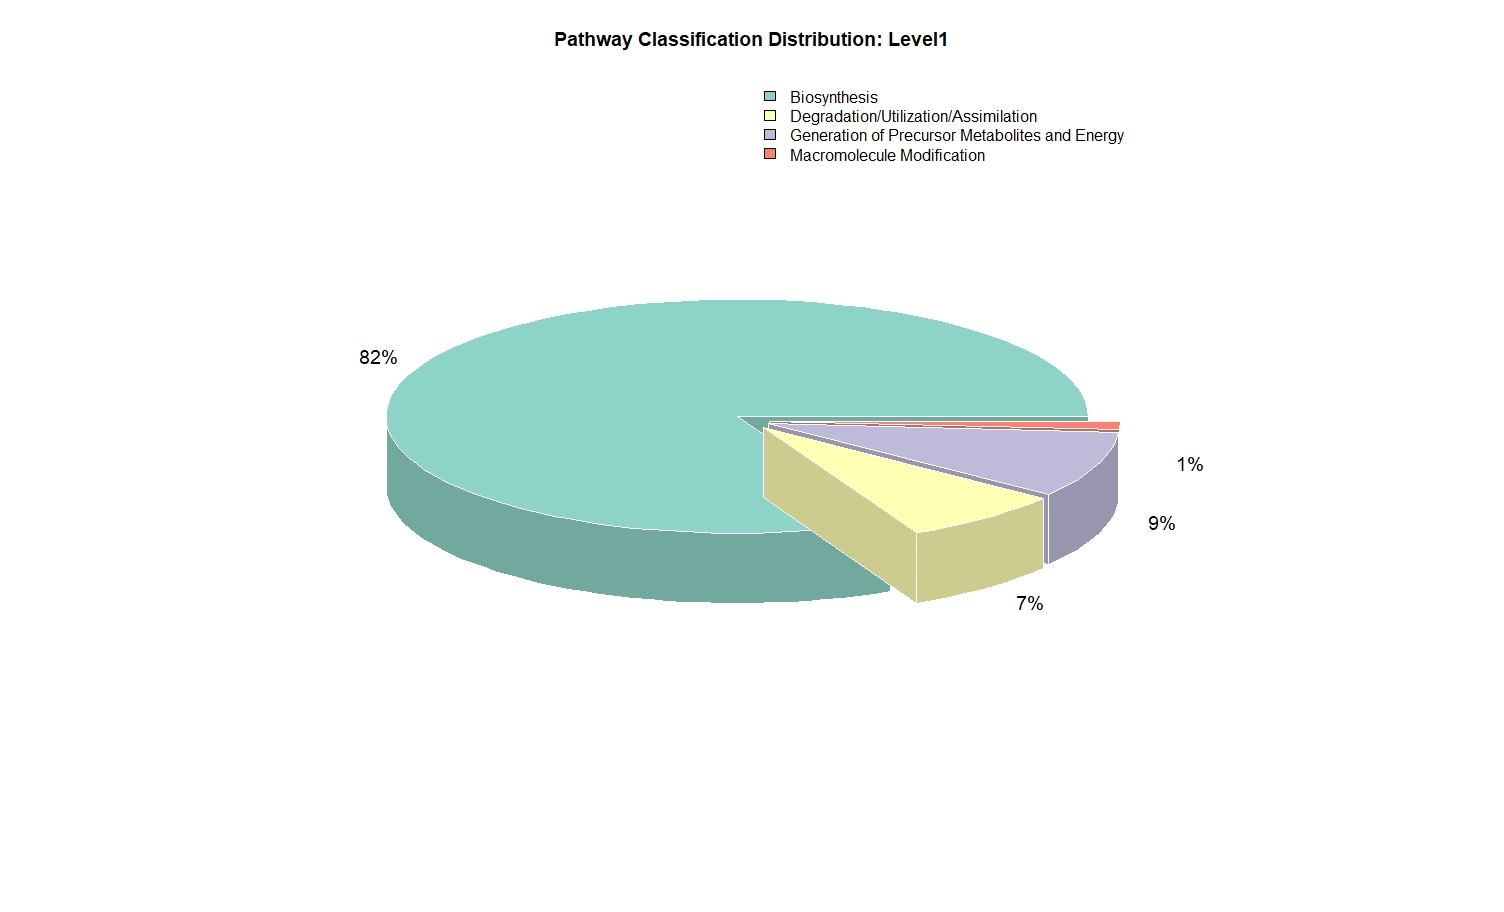** |
| --- |
| **B**  **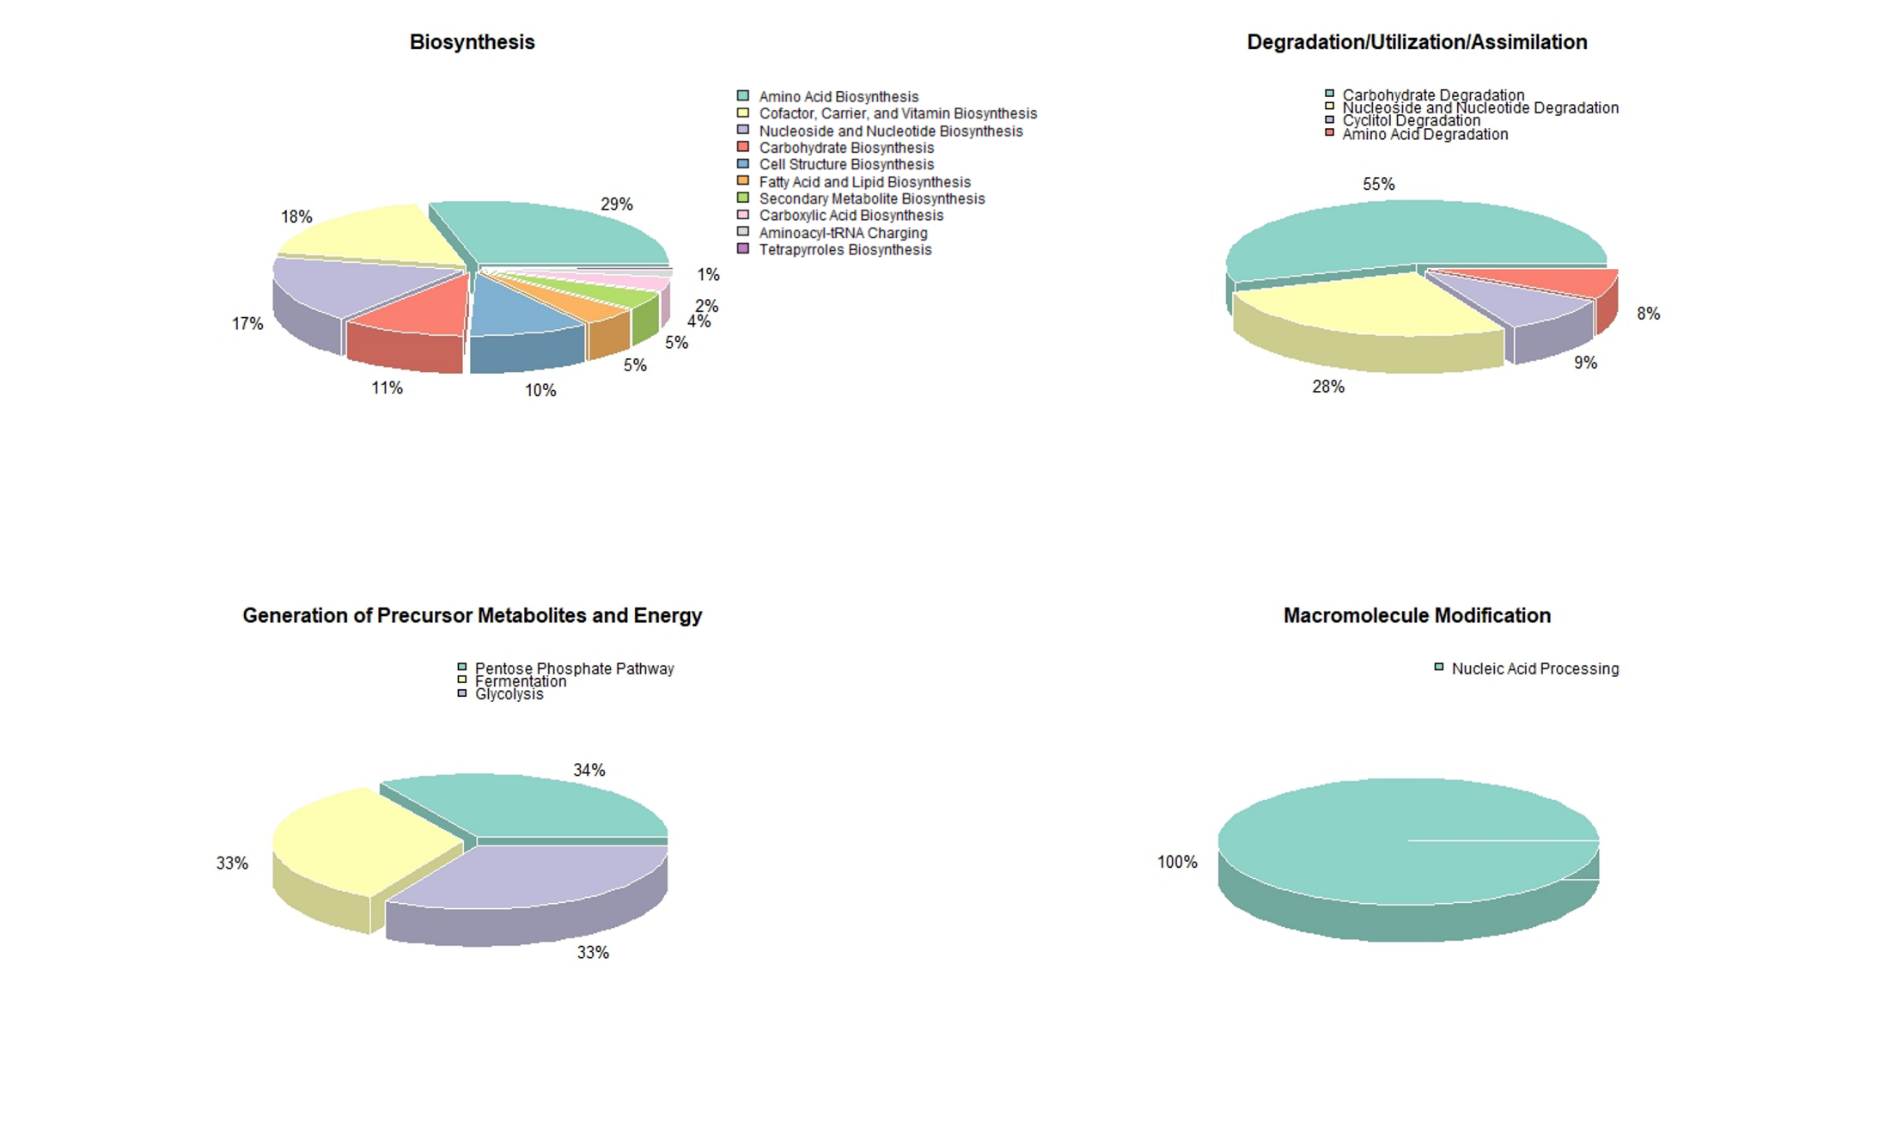** |

# Figure S17. Functional classification of metabolic pathways. (A) Distribution of pathway categories at the highest hierarchical level based on MetaCyc classification. (B) Subcategory distributions within each major functional class are shown in separate panels.


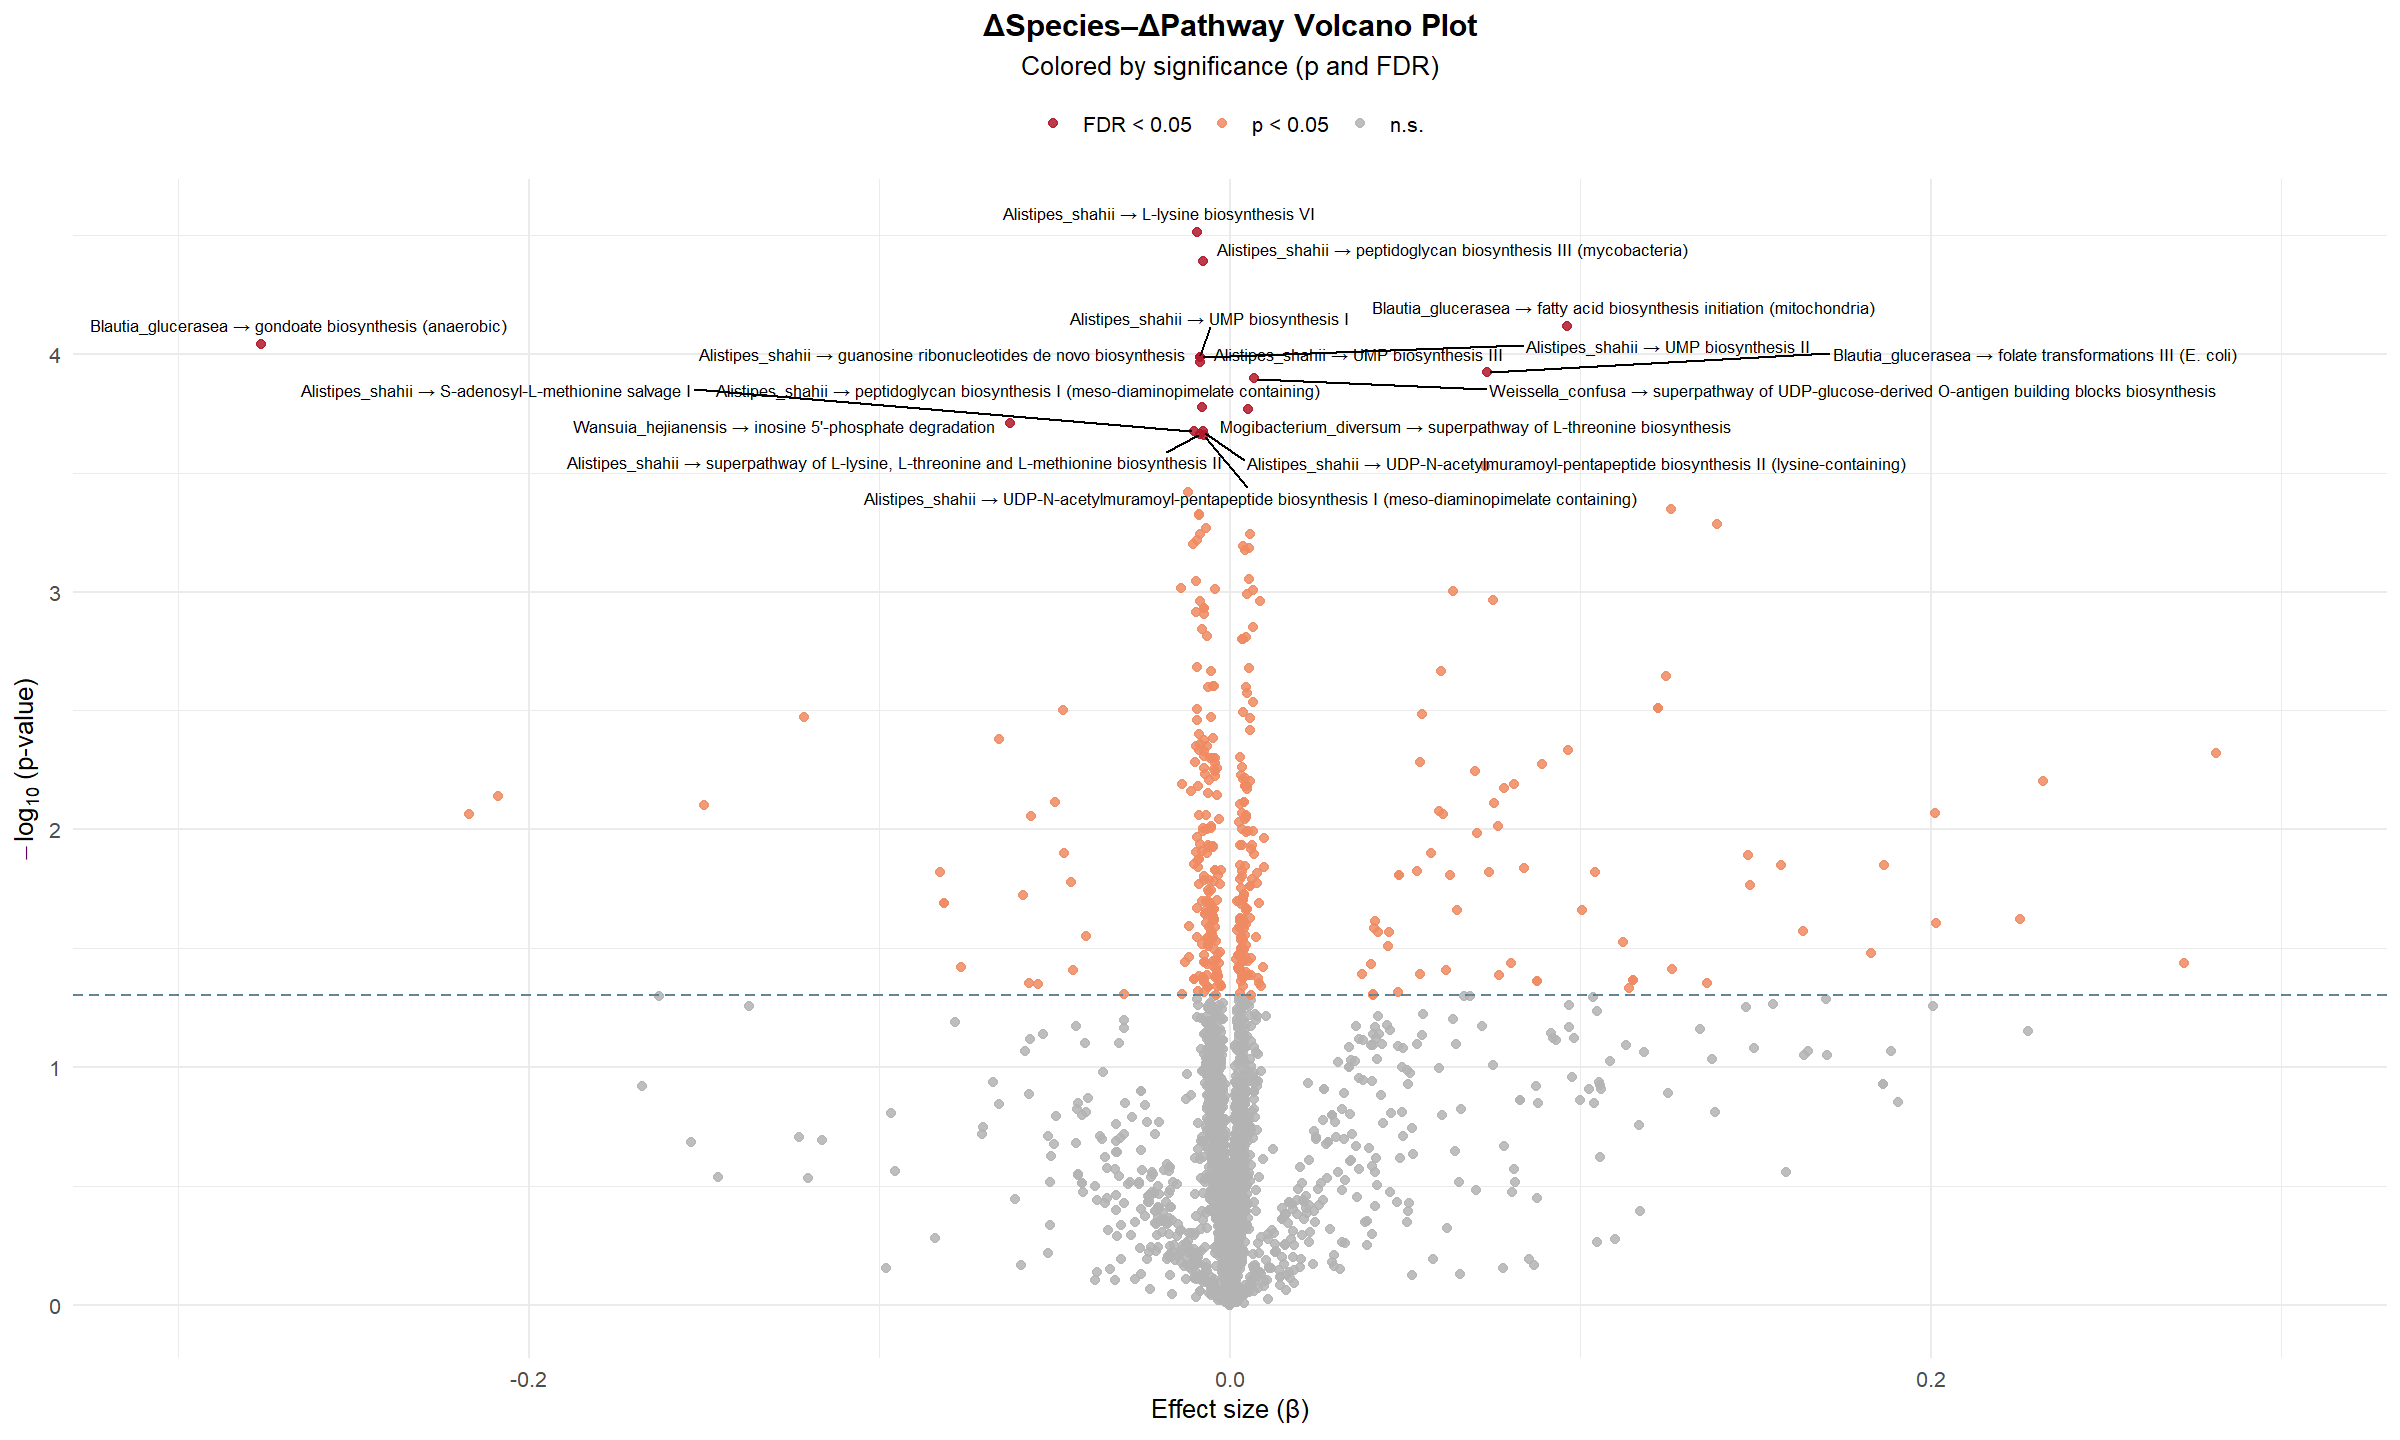


# Figure S18. Volcano plot of targeted microbial functional pathways associated with targeted species. Volcano plots depict the association between targeted microbial functional pathways and targeted species by the time-resolved causal model. Each dot represents a pathway, plotted by its estimated effect size (x-axis) and –log₁₀(p-value) (y-axis). Pathways with q-value < 0.05 are highlighted. The species and pathway abundance were log-transformed before fitted into the model.

| **A**  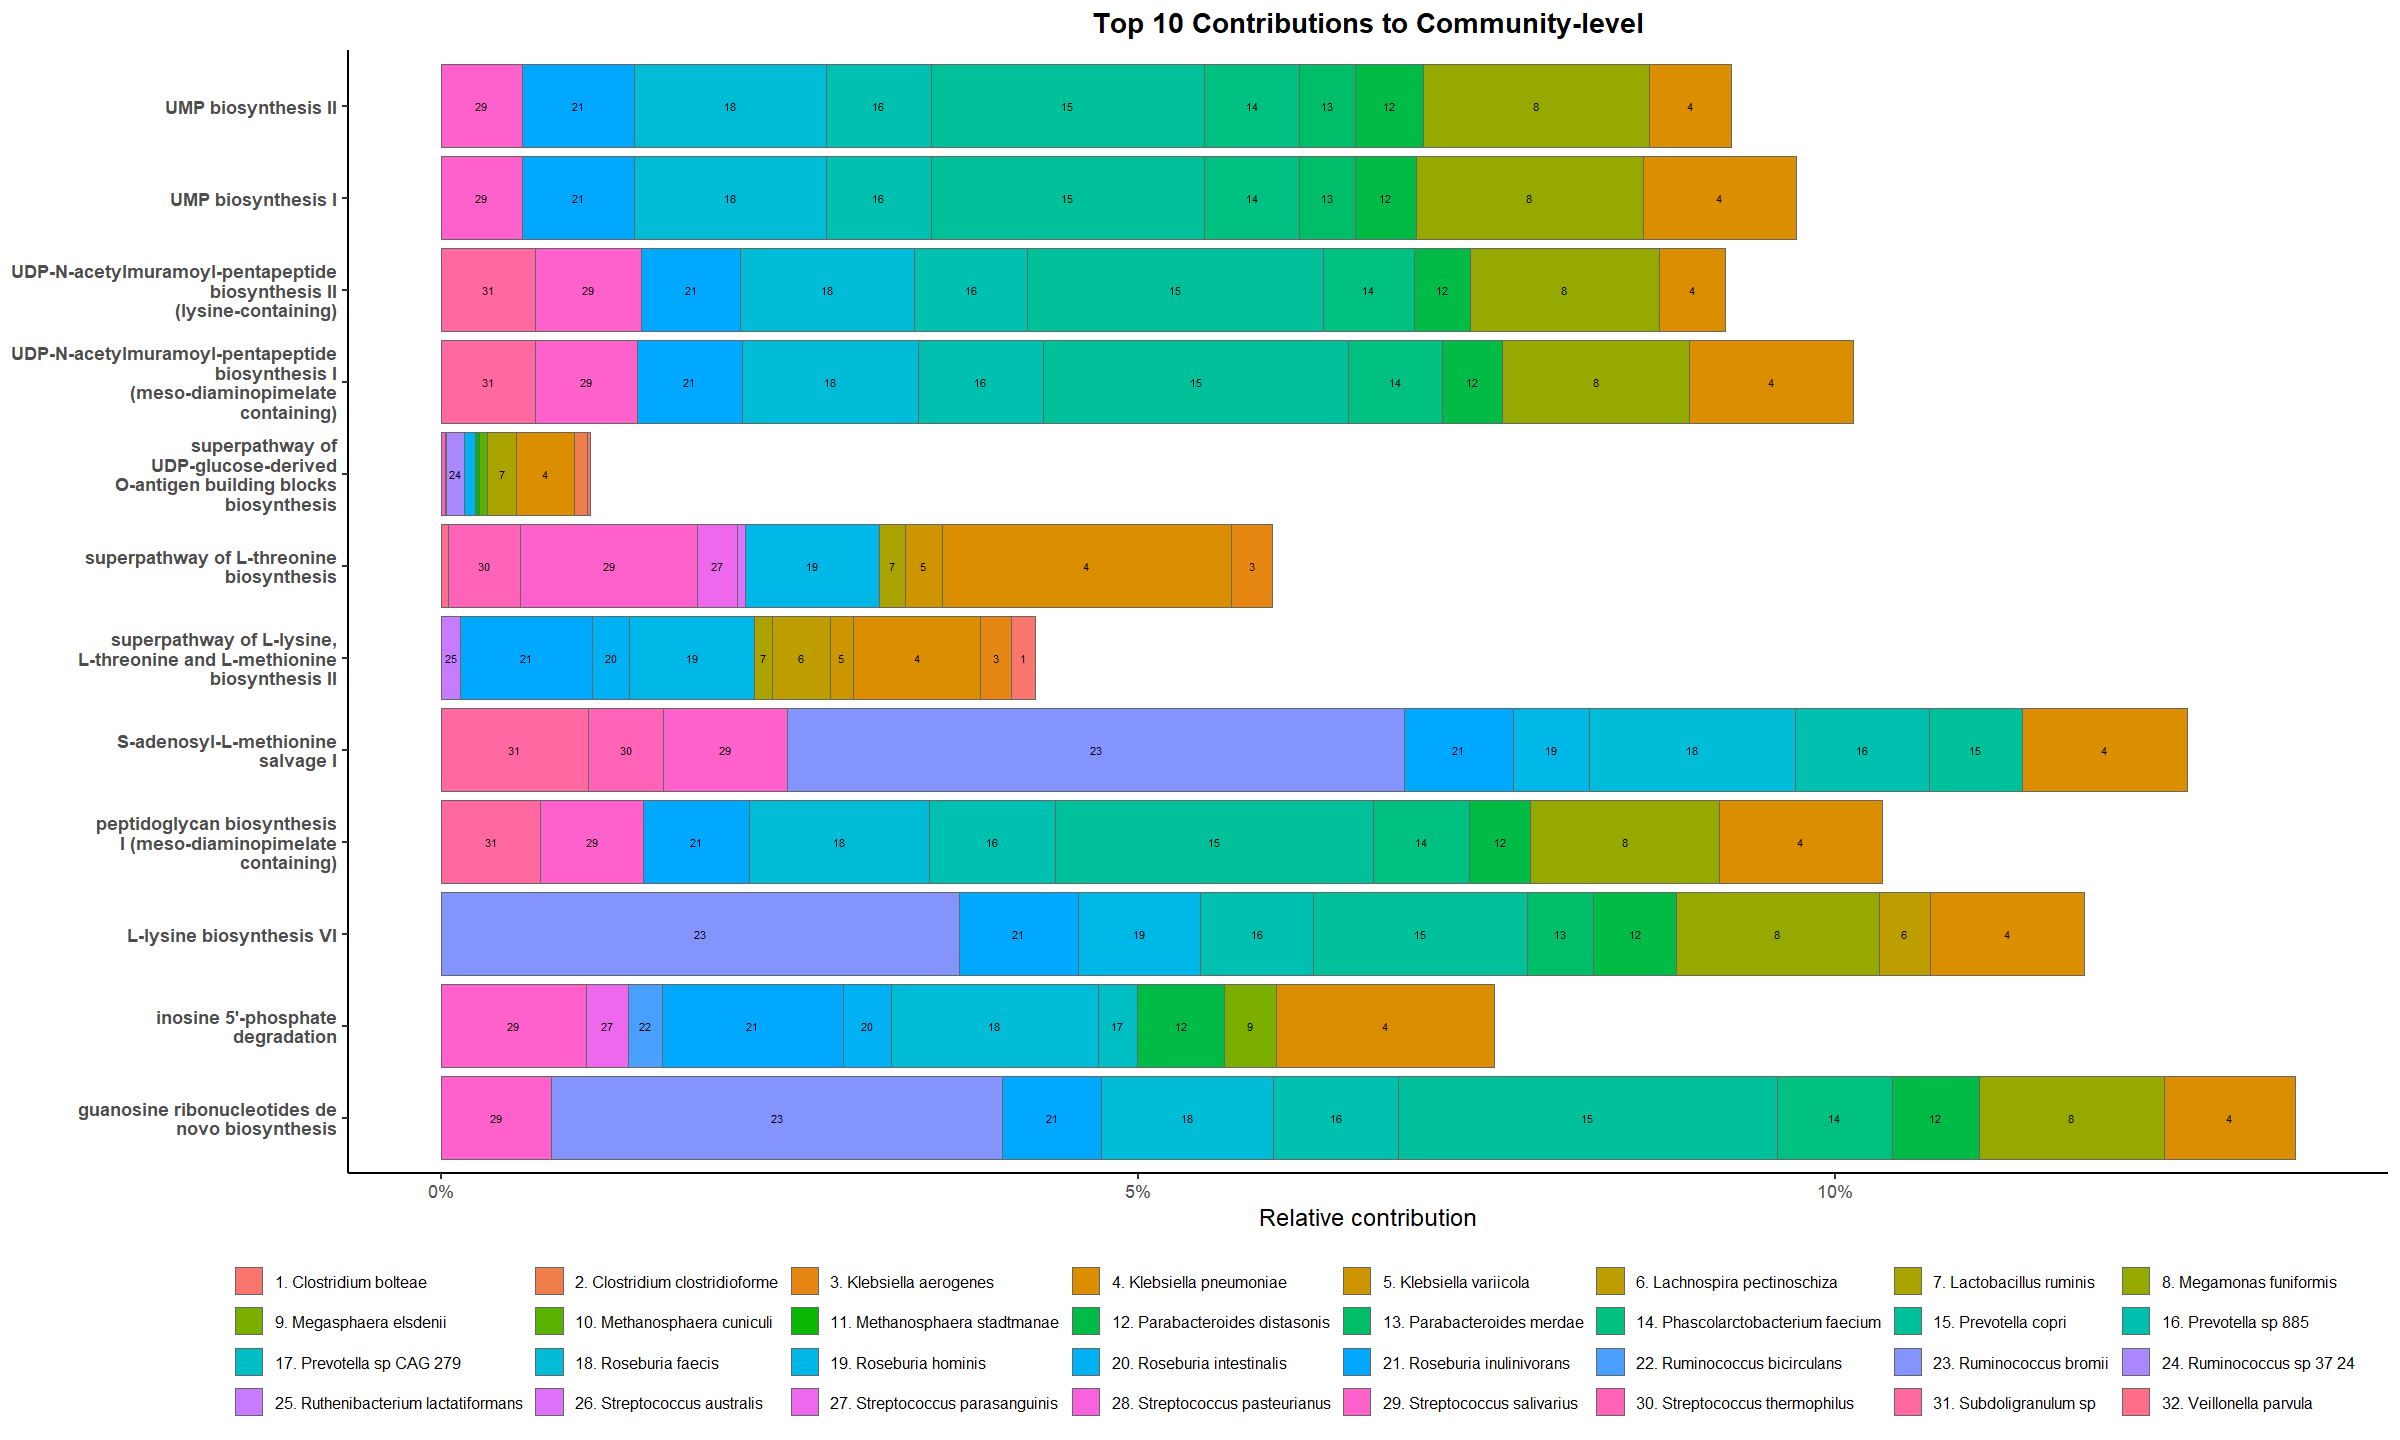 |
| --- |
| **B**  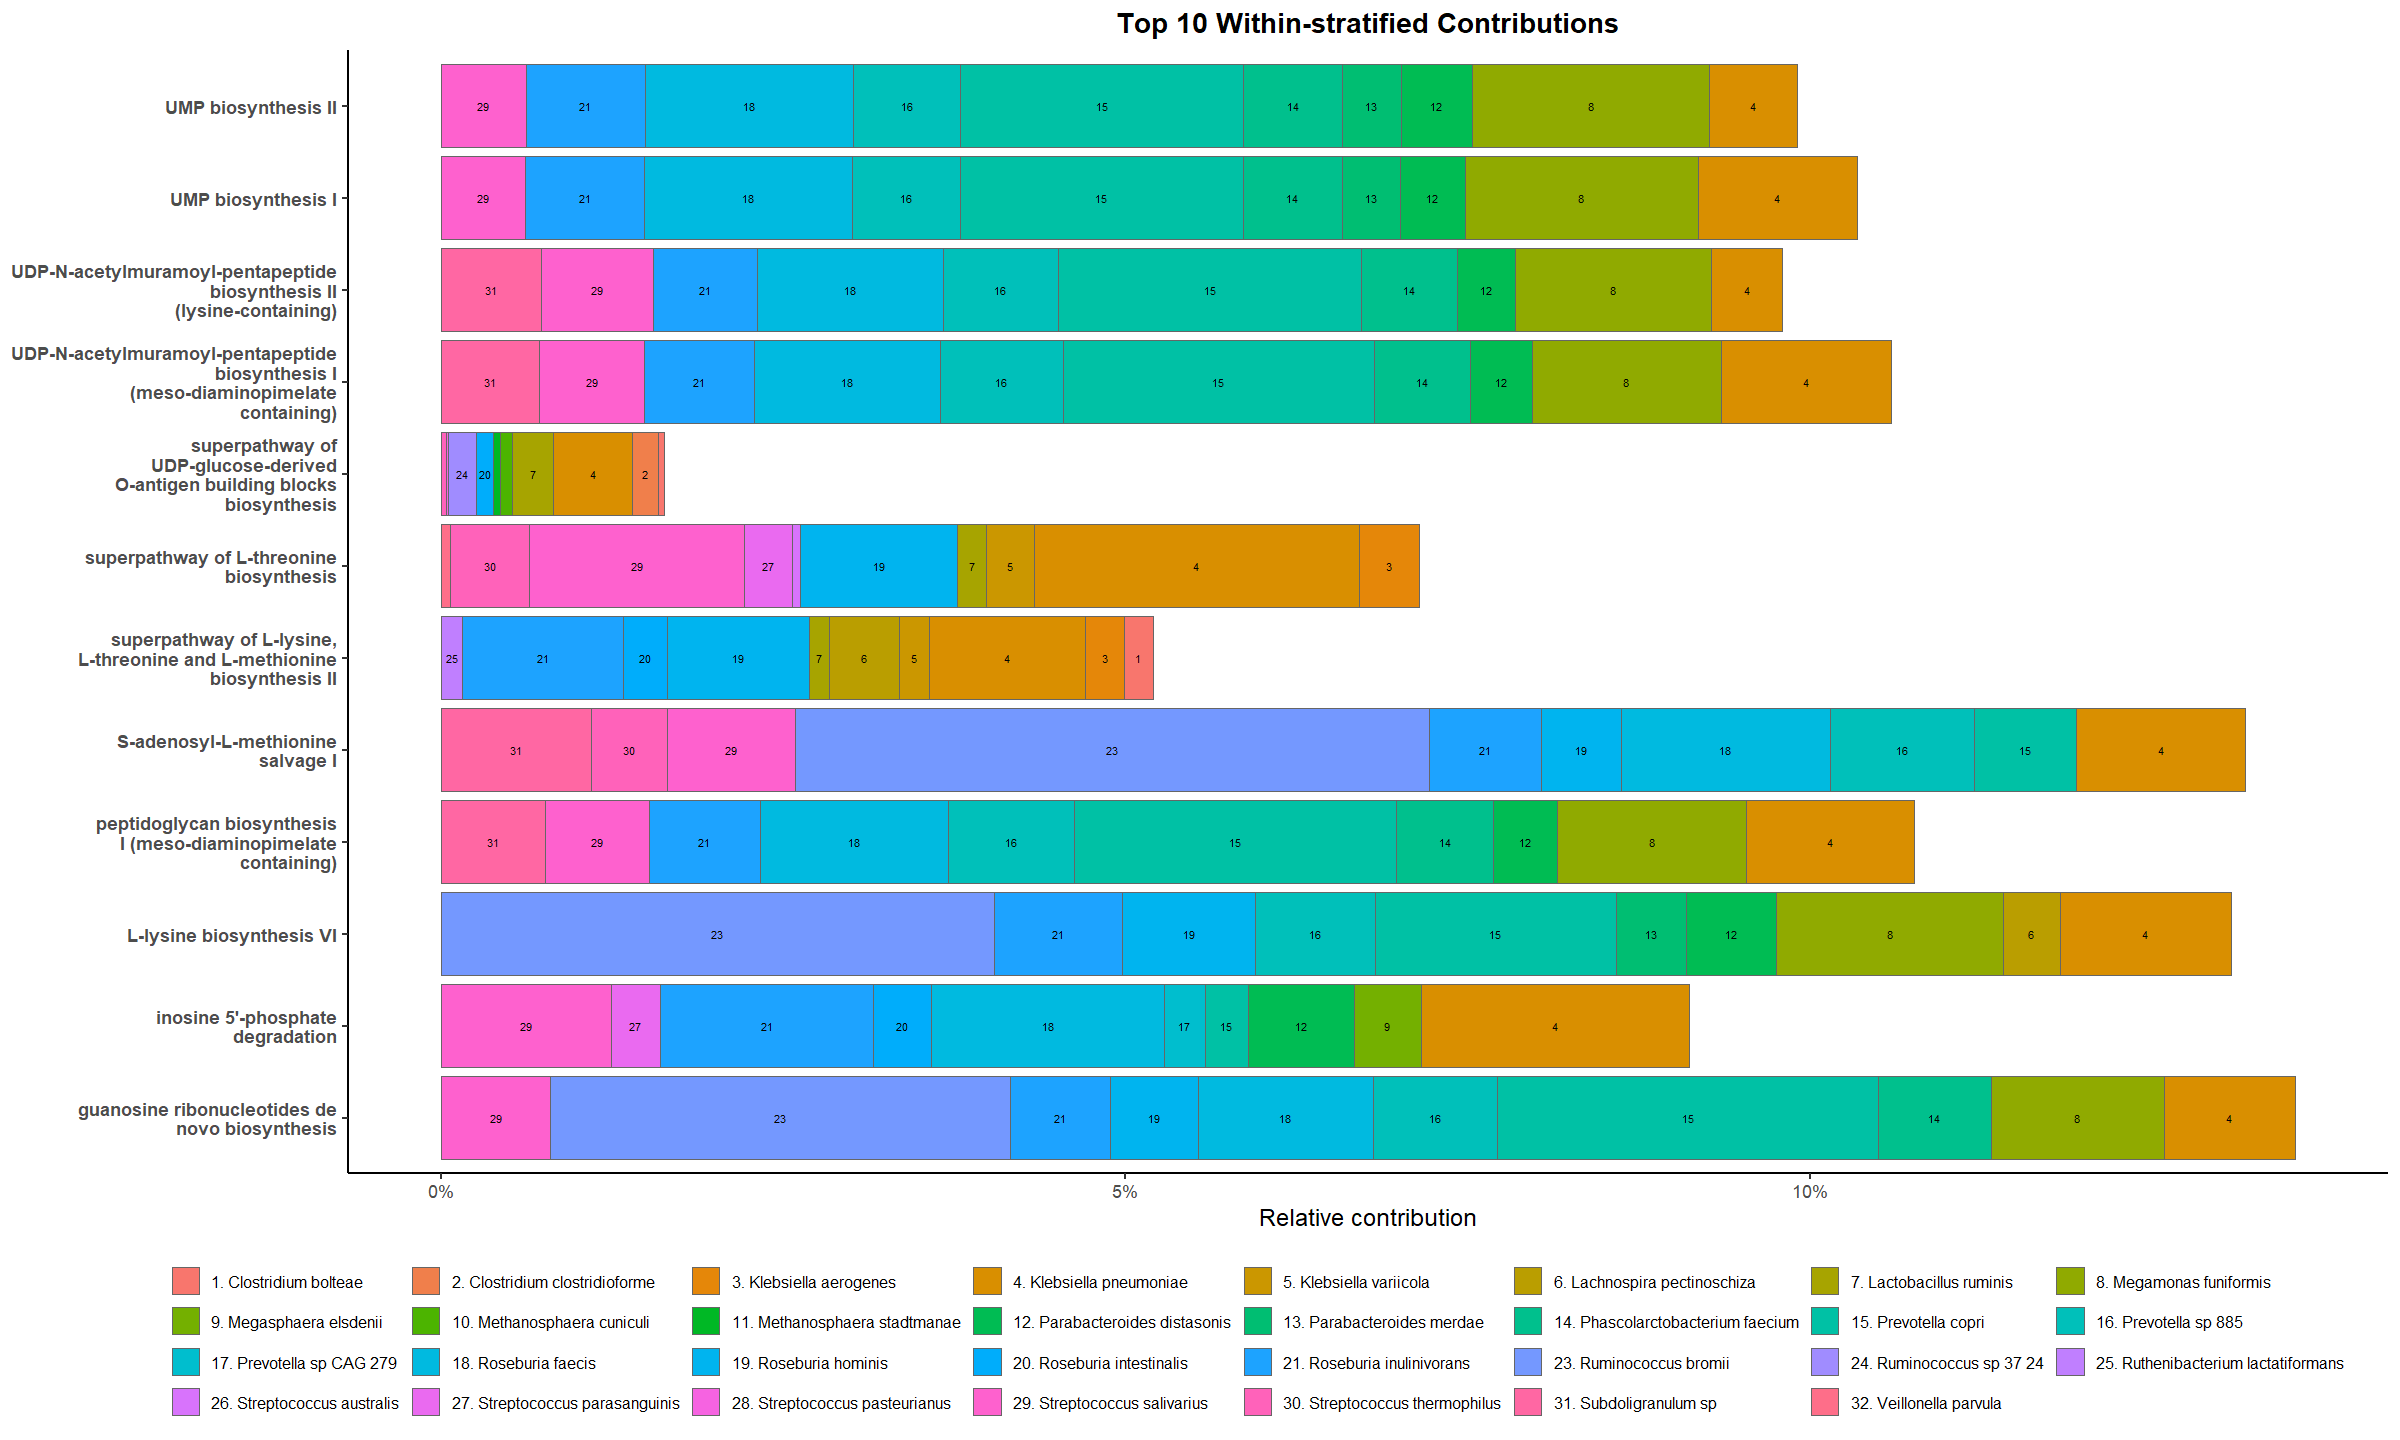 |

# Figure S19. Species-level contributions to targeted pathway abundances. Raw relative contributions were calculated using the HUMAnN3 gene family–to–pathway mapping framework, normalized to total pathway abundance. (A) Top 10 species contributing to the community-level abundance of each targeted MetaCyc pathway. (B) Top 10 species contributing within group-stratified (responder vs. non-responder) communities.


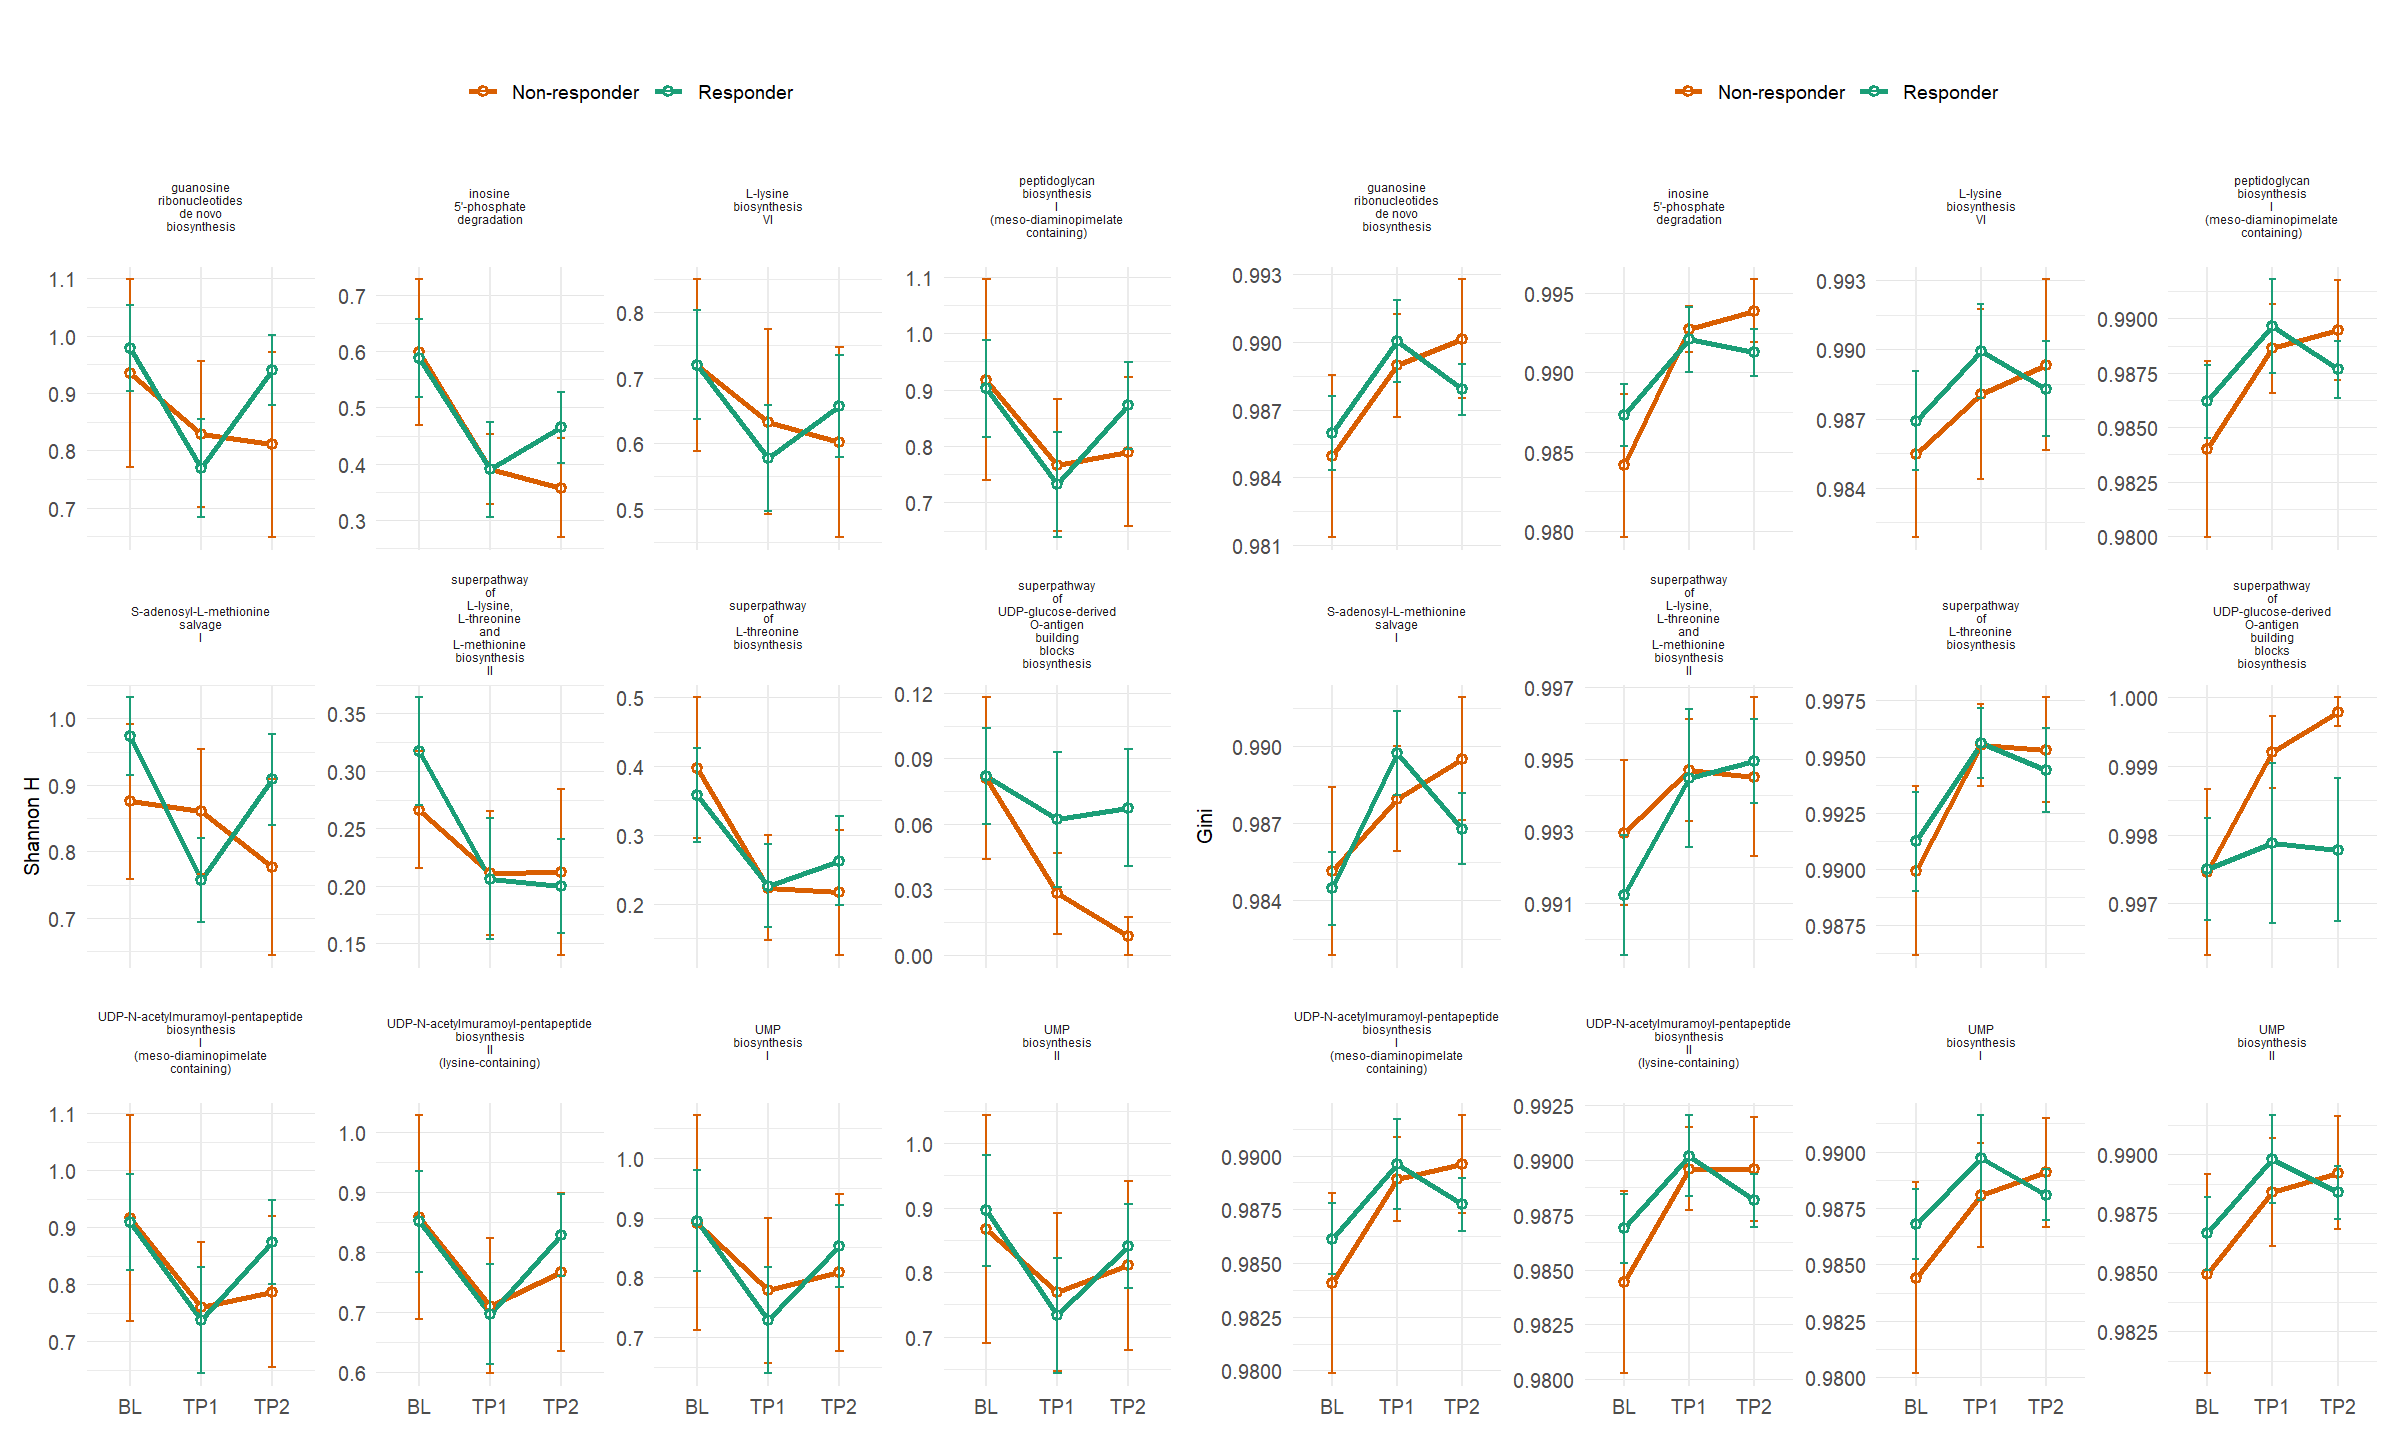


# Figure S20. Functional complementation of targeted pathways stratified by treatment response groups. Longitudinal trajectories of functional complementation indices (Shannon H and Gini coefficient) for targeted microbial pathways are shown by treatment response group (green, responders; orange, non-responders) across baseline (BL), treatment week 1 (TP1), and week 2 (TP2). Each panel represents one pathway identified in the causal and association models. Lines indicate mean values ± standard error.

| **A**  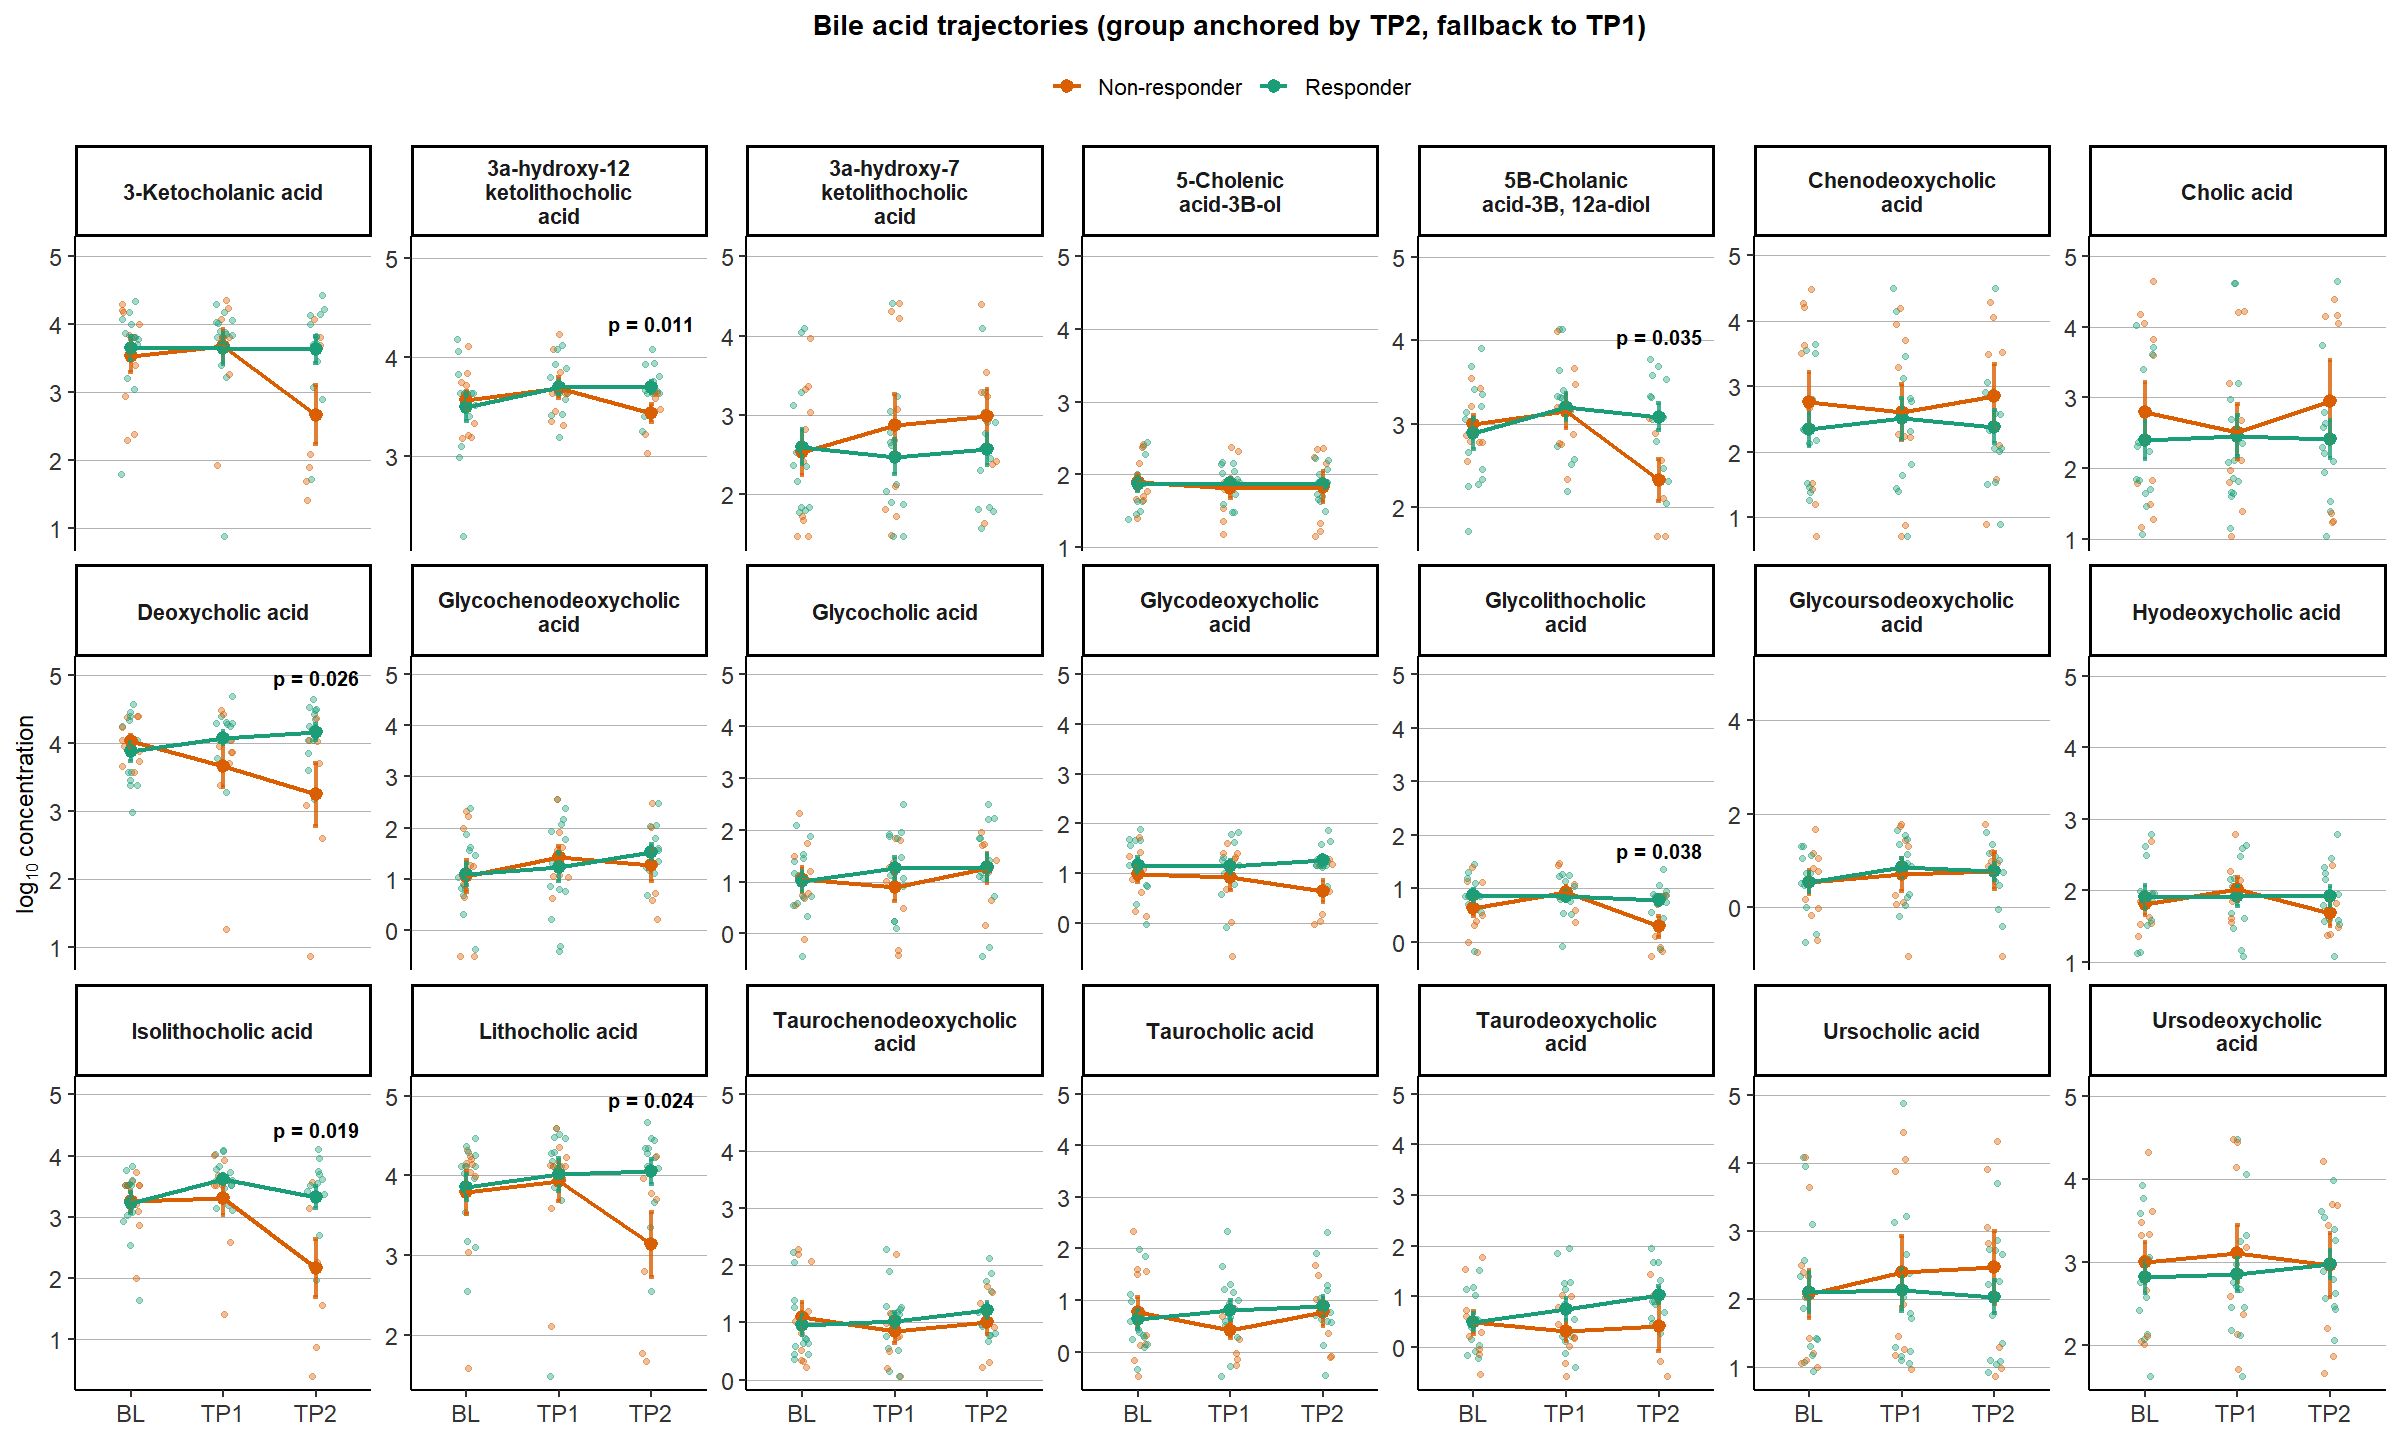 |
| --- |
| **B**  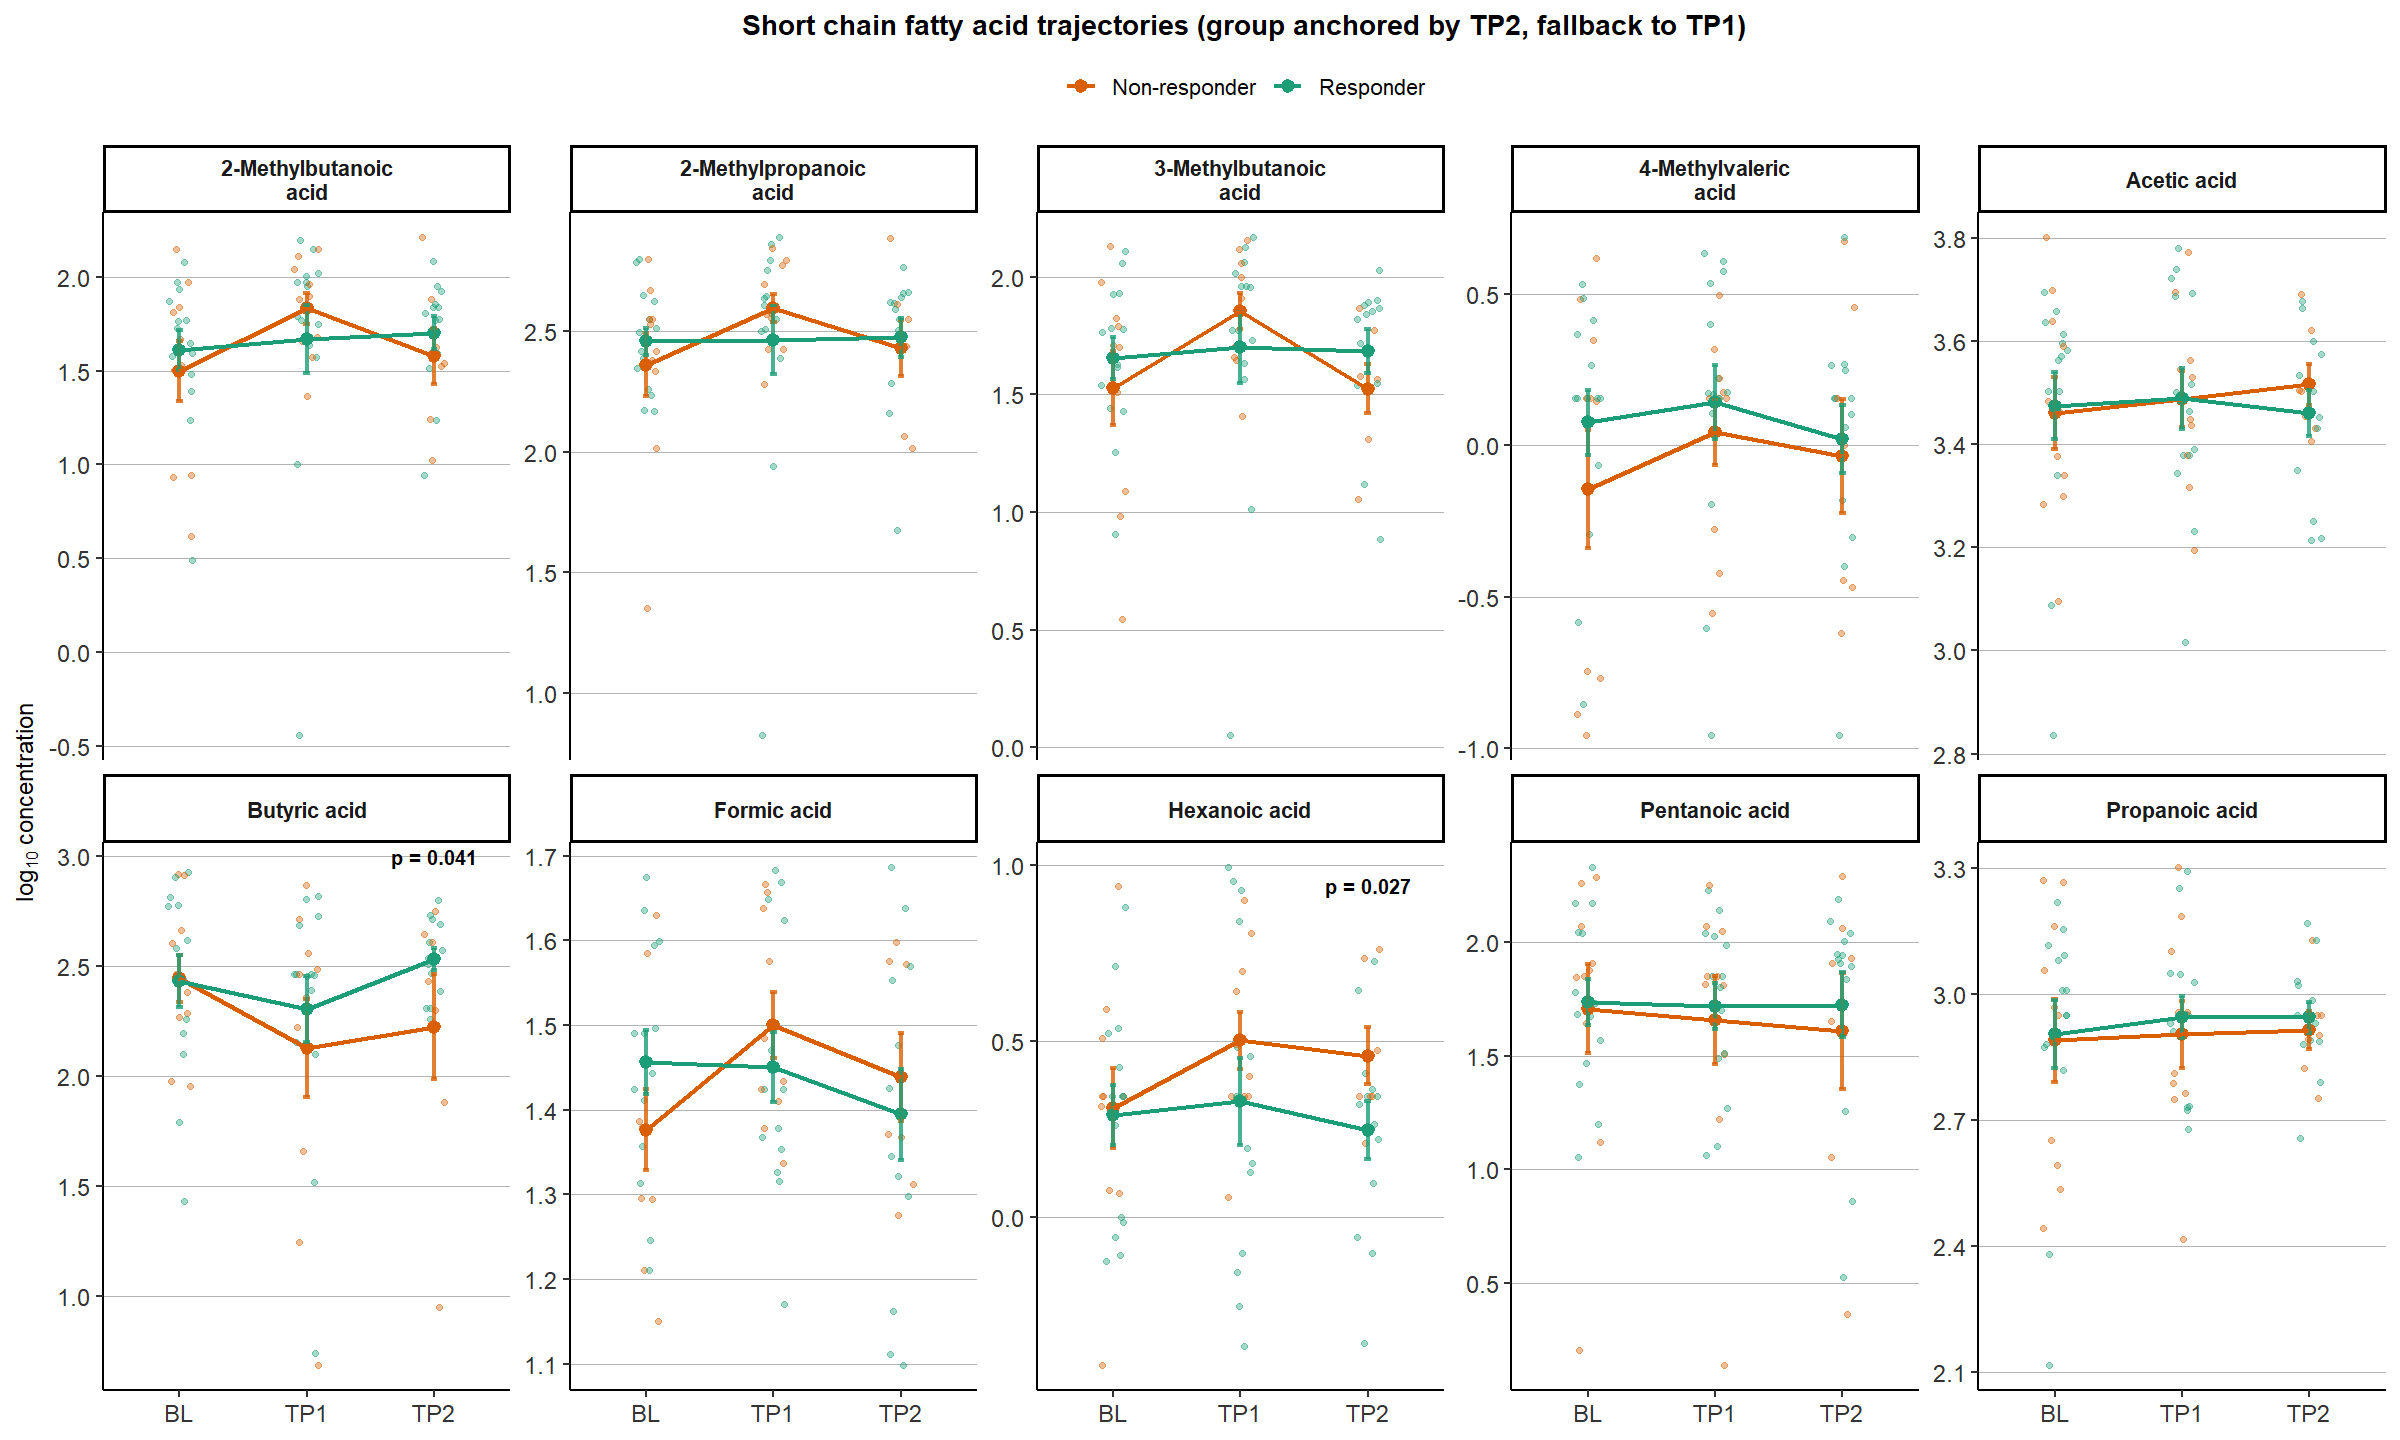 |

# Figure S21. Longitudinal trajectories of all fecal metabolites stratified by treatment response groups. Line plots illustrate the temporal trends of representative bile acids and short-chain fatty acids (SCFAs) across baseline (BL), time point one (TP1), and time point two (TP2) in responders (green) and non-responders (orange). Each point represents the group mean with 95% confidence intervals. P-values of Limma-trend cross sectional tests were labeled if significant. (A) Bile acids; (B) Short chain fatty acids.

| **A.**  **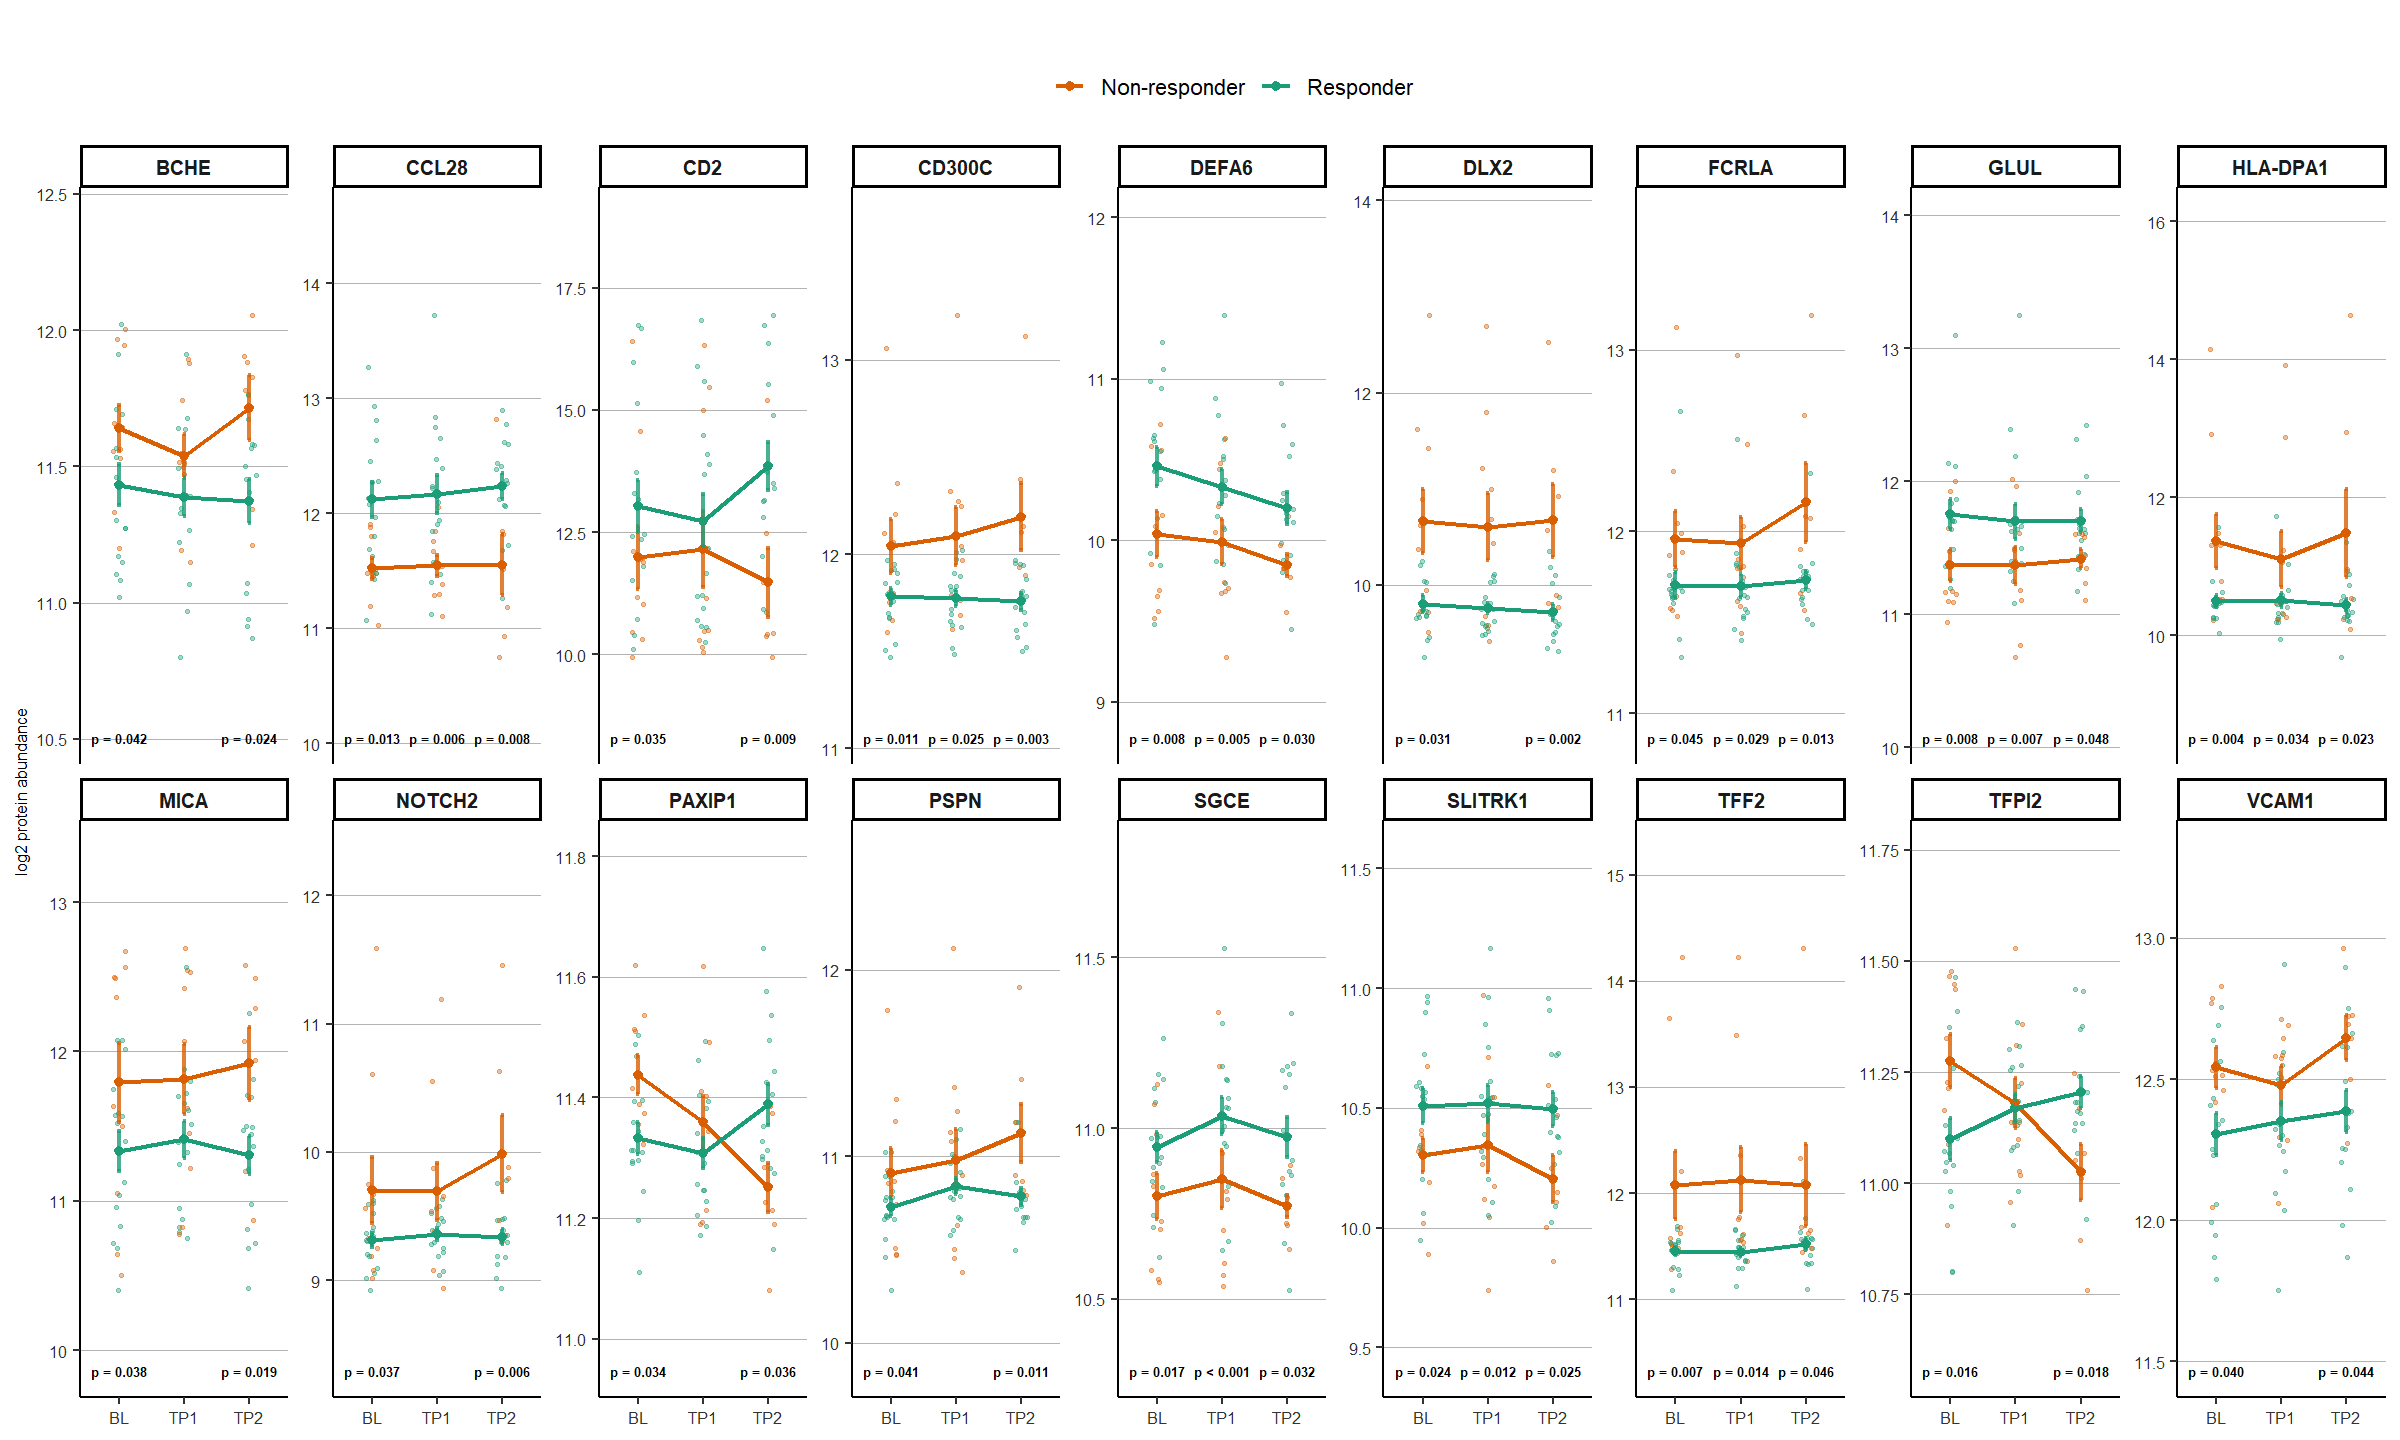** |
| --- |
| **B.**  **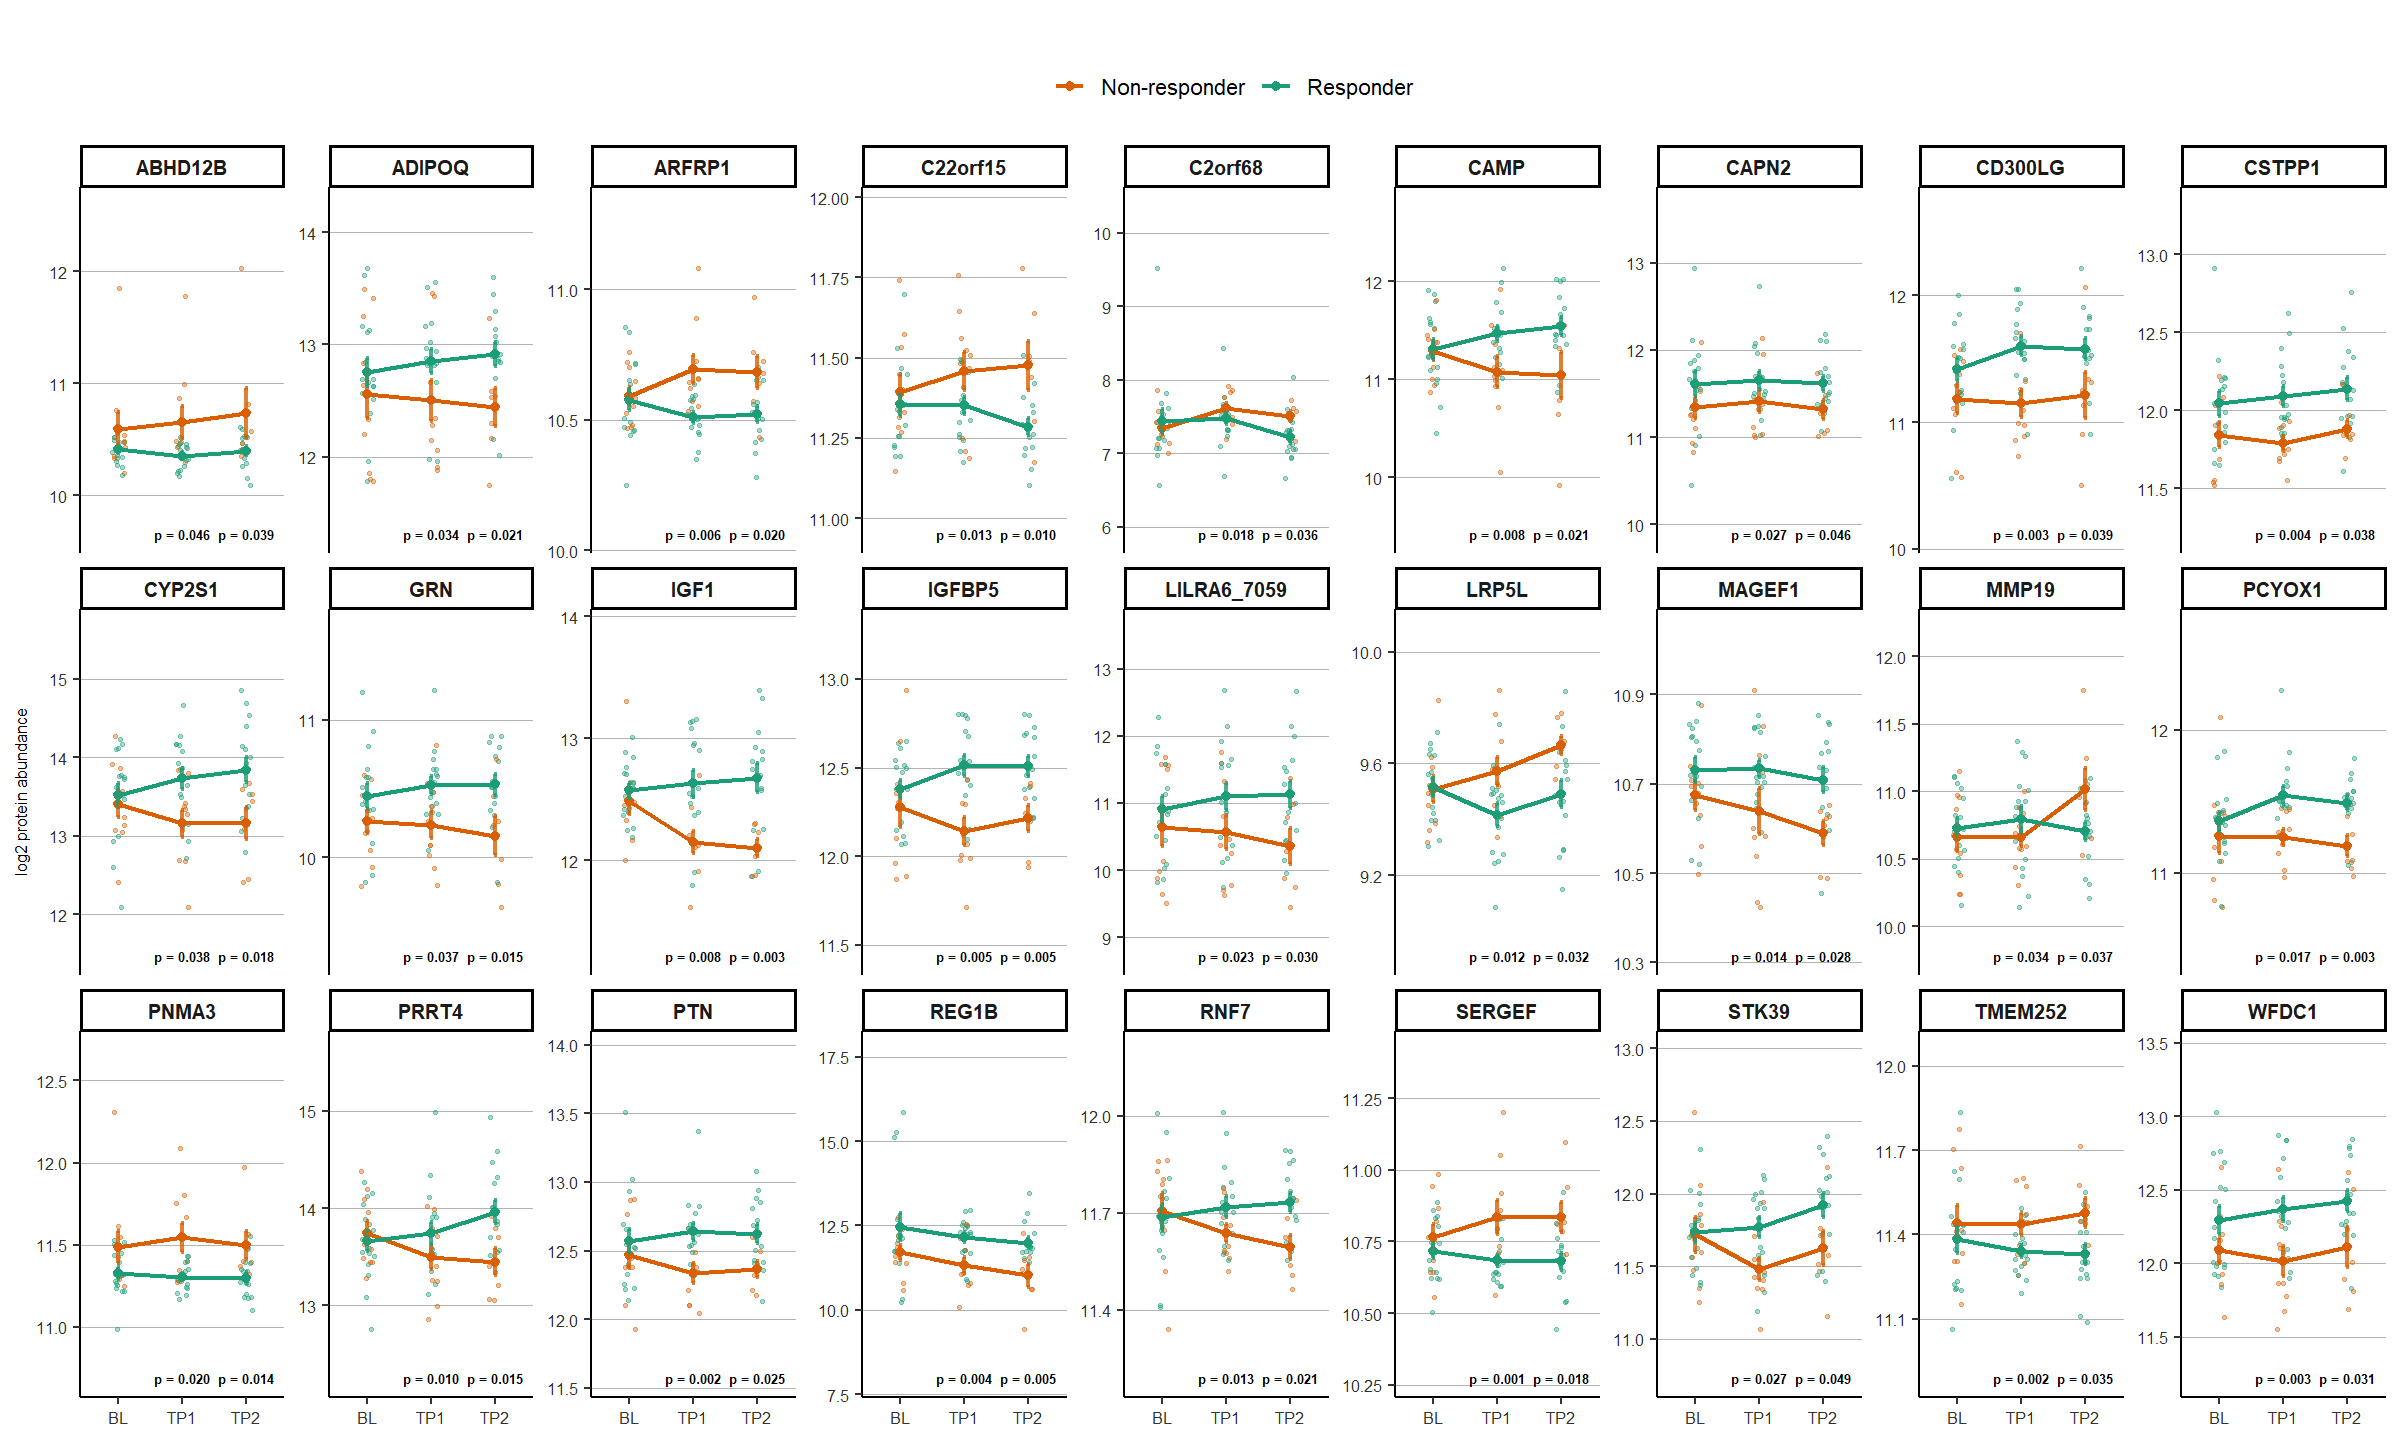** |

# Figure S22. Longitudinal trajectories of proteins with significant responder–non-responder differences at TP2. Each panel shows the trajectory of an individual protein identified as significant in a cross-sectional limma comparison between responders and non-responders at TP2. Points represent individual participants, and solid lines indicate group-wise mean trajectories across baseline (BL), TP1, and TP2. Protein abundance is displayed on the log2 scale. P-values of Limma-trend cross sectional tests were labeled if significant. (A) Significant differences at both BL and TP2. (B) BL no difference, but significant differences at both TP1 and TP2.


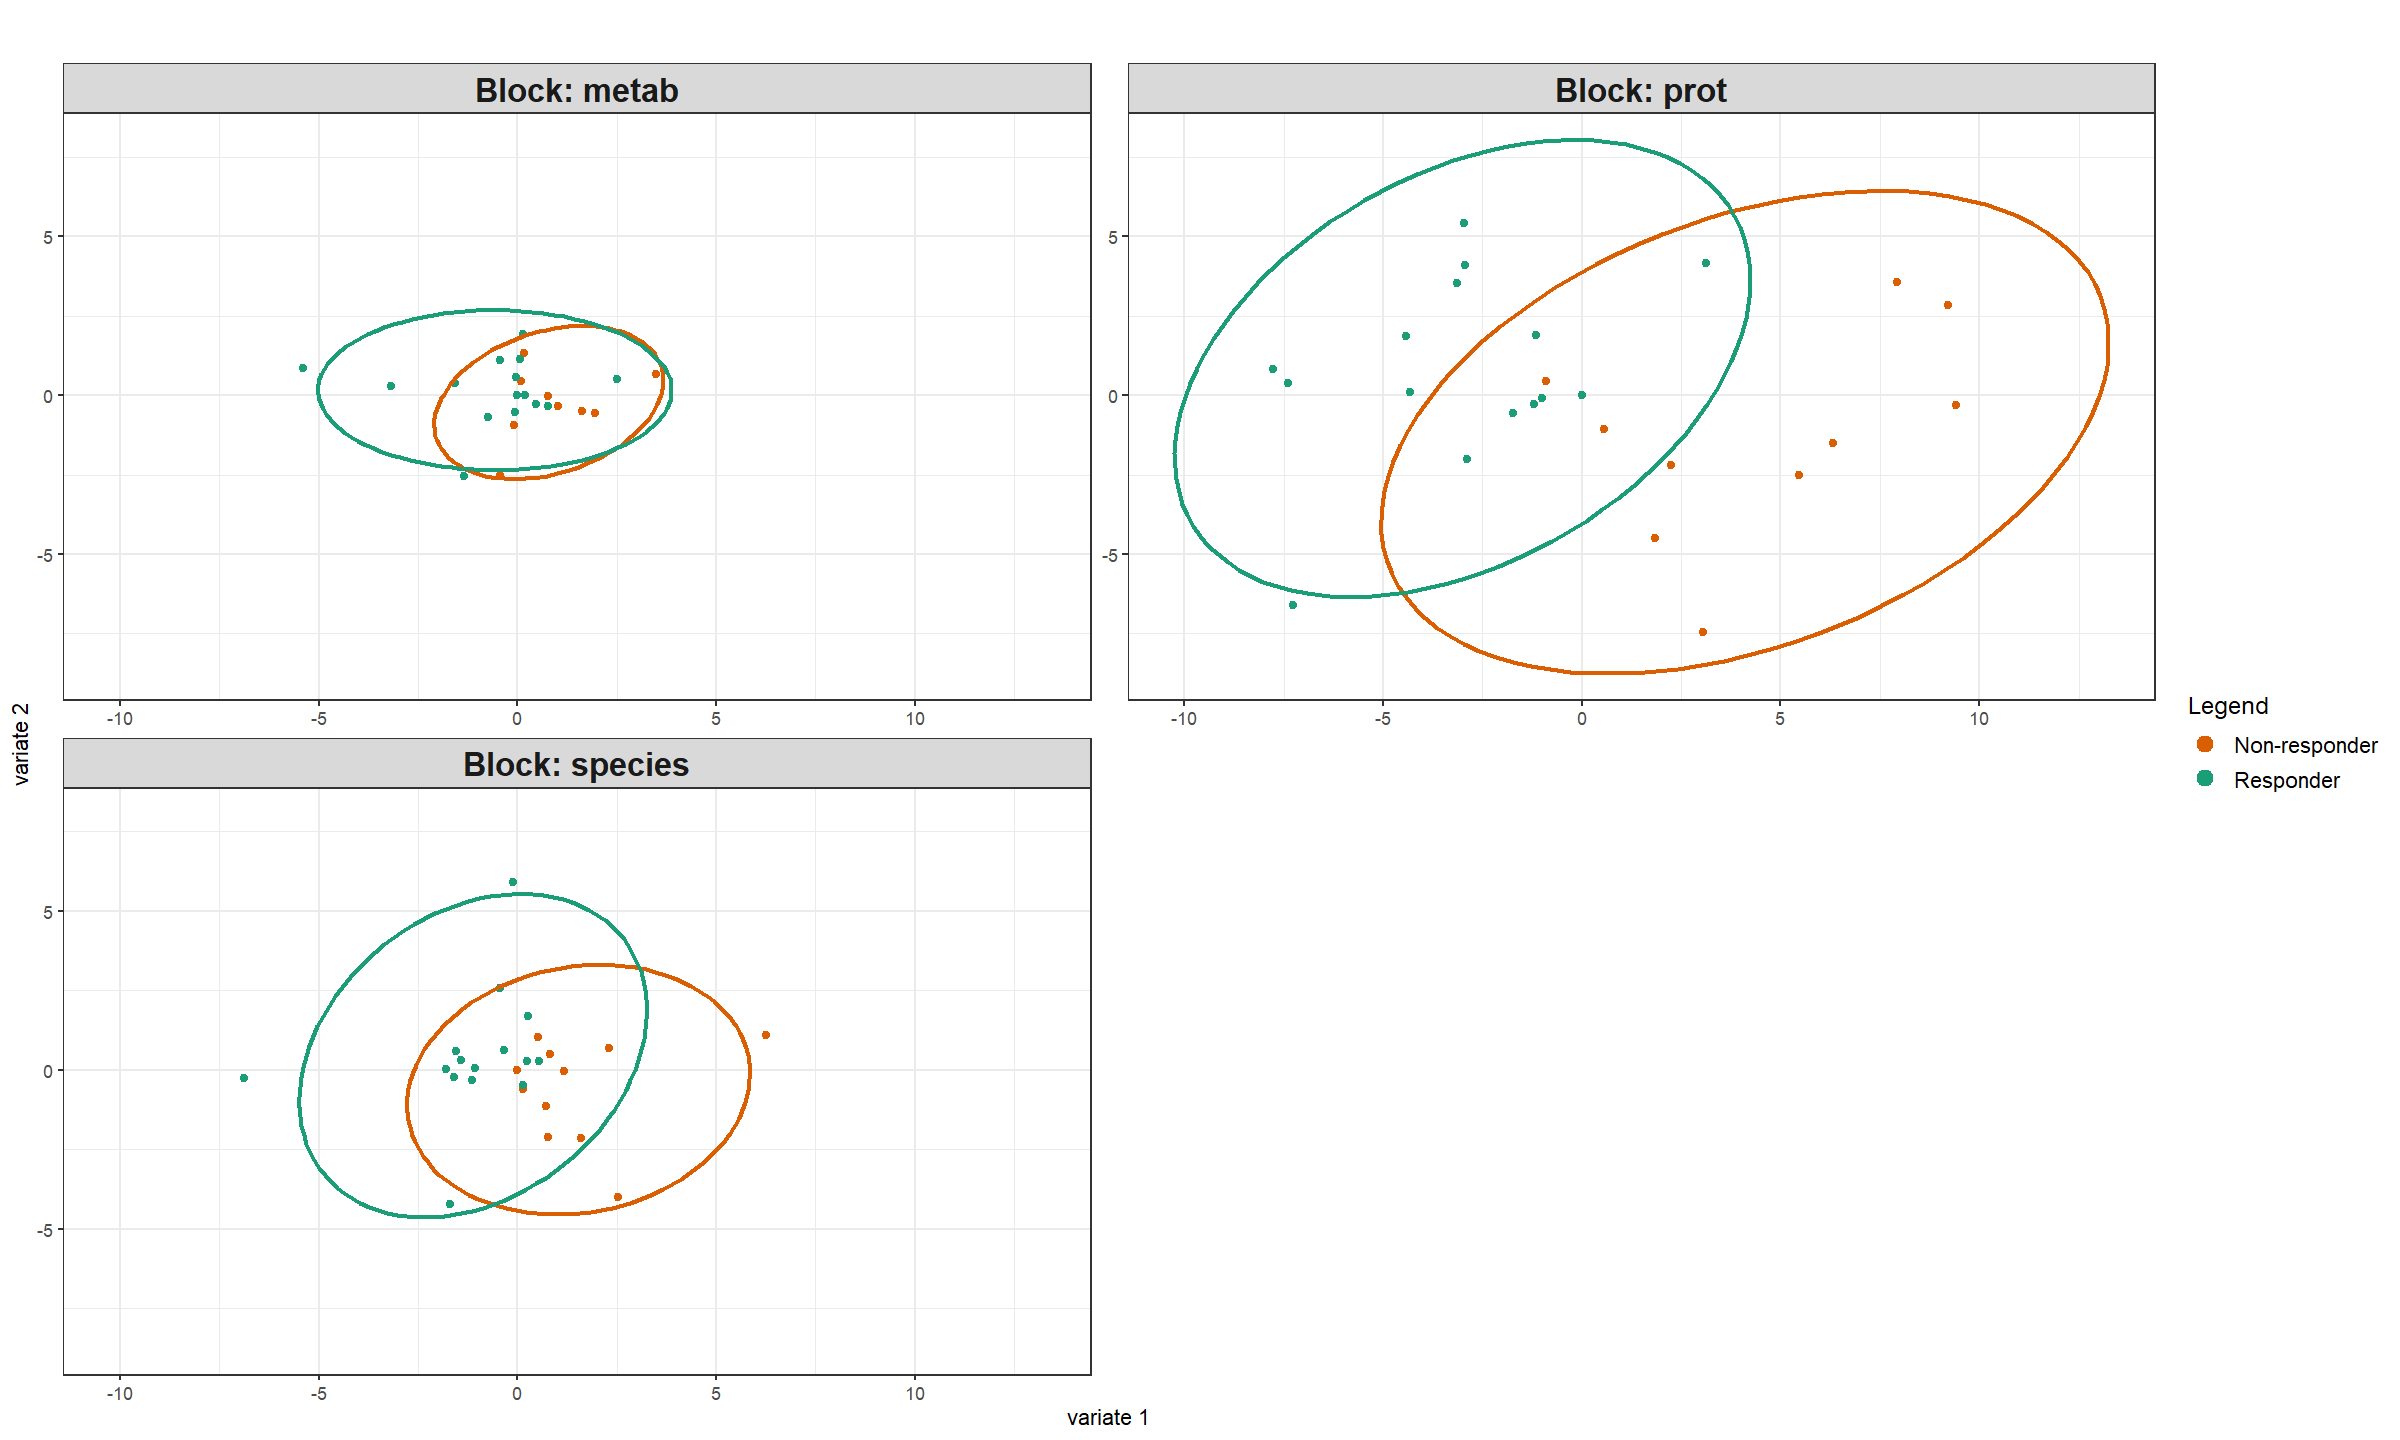


# Figure S23. Multi-omics sample projections derived from DIABLO analysis. Sample projections from the DIABLO multi-omics integration model across individual data blocks. Samples are projected onto the first two latent components (Component 1 and Component 2) for the metabolite (metab), protein (prot), and microbial species (species) blocks. Points represent individual participants and are colored by treatment response status (Responder vs. Non-responder). Ellipses indicate the 95% confidence regions for each group within each data block. The plots illustrate block-specific separation patterns between responders and non-responders captured by the DIABLO latent structure.

# Table S1. Quality control summary statistics for shotgun sequencing reads. Summary of read counts before and after trimming and host-decontamination. Passed % indicates the proportion of reads retained at each step.

| Stats | Raw | Trimmed | Cleaned (Decontaminated) |
| --- | --- | --- | --- |
| Mean | 44,139,731 | 40,839,592 | 40,826,600 |
| Sd | 12,953,592 | 12,071,141 | 12,070,437 |
| Minimum | 21,975,329 | 20,254,505 | 20,253,372 |
| Median | 43,116,650 | 39,735,970 | 39,695,047 |
| Maximum | 82,393,374 | 76,271,337 | 76,238,338 |
| Passed % | NA | 92.52% | 99.97% |

Sd: Standard Deviation.

# Table S2. Summary statistics of all quantified metabolites. Detection rate, concentration, and percentage below LOQ are shown for all measured bile acids and short chain fatty acids.

| **Metabolites** | **Categories** | **ND (%)** | **Mean (nM)** | **Sd** | **< LOQ (%)** |
| --- | --- | --- | --- | --- | --- |
| Ursocholanic Acid | BA | 88.57 | 67.37 | 19.81 | 0.00 |
| 5-Cholenic Acid-3β-ol | BA | 8.57 | 208.51 | 716.97 | 0.00 |
| 3-Ketocholanic Acid | Free BA | 1.43 | 13459.48 | 18267.25 | 0.00 |
| Lithocholic acid | Secondary, free BA | 0.00 | 25196.95 | 30533.16 | 0.00 |
| Isolithocholic Acid | Secondary, free BA | 2.86 | 7195.02 | 10441.58 | 1.47 |
| 3α,12α, 23-Nordeoxycholic Acid | Free BA | 58.57 | 25.28 | 46.81 | 3.45 |
| 9(11), (5β)-Cholenic Acid-3α-ol-12-one | BA | 94.29 | 117.93 | 75.15 | 0.00 |
| 3,7-Diketocholanic Acid | BA | 90.00 | 1098.74 | 1375.61 | 0.00 |
| 5β-Cholenic Acid-7α-ol-3-one | BA | 31.43 | 842.40 | 1282.29 | 0.00 |
| 5α-Cholanic Acid-3α-ol-6-one | BA | 90.00 | 4.50 | 3.67 | 14.29 |
| 3α-Hydroxy-7 Ketolithocholic Acid | Secondary, free BA | 1.43 | 3653.91 | 8558.92 | 0.00 |
| 3α-Hydroxy-12 Ketolithocholic Acid | Secondary, free BA | 8.57 | 15644.62 | 43449.93 | 0.00 |
| Murocholic Acid | BA | 100.00 | NA | NA | NA |
| Isodeoxycholic Acid | Free BA | 100.00 | NA | NA | NA |
| 5β-Cholanic Acid-3β, 12α-diol | BA | 7.14 | 3189.66 | 6624.83 | 0.00 |
| Deoxycholic Acid | Secondary, free BA | 4.29 | 22744.77 | 29218.89 | 0.00 |
| Chenodeoxycholic Acid | Primary, free BA | 2.86 | 4261.94 | 8387.13 | 0.00 |
| Hyodeoxycholic acid | Secondary, free BA | 14.29 | 186.23 | 402.02 | 0.00 |
| 3,7,12 Dehydrocholic acid | Free BA | 64.29 | 144.45 | 265.45 | 4.00 |
| 3α-Hydroxy-6,7-DiketoCholanic Acid | Secondary, free BA | 95.71 | 11.69 | 2.89 | 0.00 |
| 5β-Cholanic Acid-3α, 6α-diol-7-one | Secondary, free BA | 30.00 | 3742.48 | 7331.21 | 0.00 |
| 3 Dehydrocholic Acid | Free BA | 58.57 | 1076.86 | 1407.55 | 0.00 |
| Ursodeoxycholic acid | Secondary, free BA | 1.43 | 5099.36 | 10590.20 | 0.00 |
| β Muricholic Acid | Primary, free BA | 100.00 | NA | NA | NA |
| Cholic acid | Primary, free BA | 0.00 | 6374.74 | 14380.95 | 0.00 |
| Hyocholic acid (λ-MCA) | Primary, free BA | 35.71 | 167.85 | 260.59 | 0.00 |
| α Muricholic Acid | Primary, free BA | 100.00 | NA | NA | NA |
| Ursocholic acid | Free BA | 2.86 | 3777.16 | 10988.22 | 0.00 |
| Glycolithocholic Acid | Secondary, conjugated BA | 15.71 | 18.06 | 27.46 | 0.00 |
| Glycohyodeoxycholic Acid | Secondary, conjugated BA | 84.29 | 4.72 | 8.04 | 0.00 |
| Glycochenodeoxycholic Acid | Primary, conjugated BA | 5.71 | 105.73 | 224.76 | 6.06 |
| Glycodeoxycholic acid | Secondary, conjugated BA | 7.14 | 80.76 | 184.47 | 1.54 |
| Glycoursodeoxycholic Acid | Secondary, conjugated BA | 14.29 | 16.96 | 25.21 | 3.33 |
| 3,7,12 Glycodehydrocholic acid | Conjugated BA | 100.00 | NA | NA | NA |
| Glycocholic Acid | Primary, conjugated BA | 4.29 | 105.05 | 283.09 | 8.96 |
| Glycohyocholic acid | Primary, conjugated BA | 84.29 | 0.54 | 0.66 | 18.18 |
| Tauro-ursocholanic acid | BA | 100.00 | NA | NA | NA |
| Taurolithocholic acid | Secondary, conjugated BA | 27.14 | 6.83 | 12.21 | 1.96 |
| Tauro-ursodeoxycholic acid | Secondary, conjugated BA | 22.86 | 5.35 | 12.75 | 16.67 |
| Taurohyodeoxycholic acid | Secondary, conjugated BA | 94.29 | 1.50 | 0.79 | 0.00 |
| Taurochenodeoxycholic acid | Secondary, conjugated BA | 1.43 | 44.11 | 84.63 | 2.9 |
| Taurodeoxycholic acid | Secondary, conjugated BA | 11.43 | 18.22 | 33.39 | 6.45 |
| 3,7,12 Taurodehydrocholic acid | BA | 98.57 | 0.01 | NA | 100.00 |
| Taurohyocholic acid | BA | 85.71 | 0.47 | 0.27 | 0.00 |
| Tauro alpha-Muricholic acid | Primary, conjugated BA | 74.29 | 2.31 | 3.67 | 0.00 |
| Taurocholic acid | Primary, conjugated BA | 0.00 | 31.79 | 69.18 | 0.00 |
| Formic acid | SCFA | 0.00 | 29.56 | 11.18 | NA |
| Acetic acid | SCFA | 0.00 | 3382.66 | 1522.80 | NA |
| Propanoic acid | SCFA | 0.00 | 1108.40 | 696.59 | NA |
| Butyric acid | SCFA | 0.00 | 422.59 | 435.35 | NA |
| 2-Methylpropanoic acid | SCFA | 0.00 | 382.65 | 218.12 | NA |
| Pentanoic acid | SCFA | 0.00 | 95.73 | 91.84 | NA |
| 3-Methylbutanoic acid | SCFA | 0.00 | 66.97 | 44.44 | NA |
| 2-Methylbutanoic acid | SCFA | 0.00 | 65.60 | 42.76 | NA |
| 3-Methylpentanoic acid | SCFA | 100.00 | NA | NA | NA |
| 4-Methylvaleric acid | SCFA | 12.86 | 2.52 | 3.25 | NA |
| Hexanoic acid | SCFA | 0.00 | 11.18 | 18.38 | NA |

BA: Bile Acid; SCFA: Short Chain Fatty Acid; ND: Non-Detected; Sd: Standard Deviation; LOQ: Limit of Quantification.

# Table S3. Filtered and cleaned metabolites statistics. Detection rate, concentration, and percentage below LOQ are shown for all measured bile acids and short chain fatty acids after filtering and imputation.

| **Metabolites** | **Categories** | **ND (%)** | **Mean (nM)** | **Sd** | **< LOQ (%)** |
| --- | --- | --- | --- | --- | --- |
| 5-Cholenic Acid-3β-ol | BA | 8.57 | 95.48 | 68.28 | 0.00 |
| 3-Ketocholanic Acid | Free BA | 1.43 | 7437.11 | 6335.44 | 0.00 |
| Lithocholic acid | Secondary, free BA | 0.00 | 14116.48 | 10504.29 | 0.00 |
| Isolithocholic Acid | Secondary, free BA | 2.86 | 3533.22 | 3070.69 | 1.47 |
| 3α-Hydroxy-7 Ketolithocholic Acid | Secondary, free BA | 1.43 | 2918.71 | 6427.75 | 0.00 |
| 3α-Hydroxy-12 Ketolithocholic Acid | Secondary, free BA | 8.57 | 5114.55 | 3616.78 | 0.00 |
| 5β-Cholanic Acid-3β, 12α-diol | BA | 7.14 | 2181.61 | 3000.21 | 0.00 |
| Deoxycholic Acid | Secondary, free BA | 4.29 | 14357.10 | 11532.09 | 0.00 |
| Chenodeoxycholic Acid | Primary, free BA | 2.86 | 3771.29 | 7750.55 | 0.00 |
| Hyodeoxycholic acid | Secondary, free BA | 14.29 | 139.48 | 161.81 | 0.00 |
| Ursodeoxycholic acid | Secondary, free BA | 1.43 | 3696.55 | 7066.51 | 0.00 |
| Cholic acid | Primary, free BA | 0.00 | 5113.08 | 10897.46 | 0.00 |
| Ursocholic acid | Free BA | 2.86 | 3228.71 | 10402.77 | 0.00 |
| Glycolithocholic Acid | Secondary, conjugated BA | 15.71 | 8.41 | 6.90 | 0.00 |
| Glycochenodeoxycholic Acid | Primary, conjugated BA | 5.71 | 60.64 | 90.88 | 6.06 |
| Glycodeoxycholic acid | Secondary, conjugated BA | 7.14 | 19.58 | 18.37 | 1.54 |
| Glycoursodeoxycholic Acid | Secondary, conjugated BA | 14.29 | 12.76 | 15.70 | 3.33 |
| Glycocholic Acid | Primary, conjugated BA | 4.29 | 41.66 | 65.41 | 8.96 |
| Taurochenodeoxycholic acid | Secondary, conjugated BA | 1.43 | 30.12 | 50.45 | 2.90 |
| Taurodeoxycholic acid | Secondary, conjugated BA | 11.43 | 12.73 | 21.10 | 6.45 |
| Taurocholic acid | Primary, conjugated BA | 0.00 | 21.12 | 46.89 | 0.00 |
| Formic acid | SCFA | 0.00 | 28.68 | 10.08 | NA |
| Acetic acid | SCFA | 0.00 | 3287.05 | 1261.76 | NA |
| Propanoic acid | SCFA | 0.00 | 935.16 | 419.59 | NA |
| Butyric acid | SCFA | 0.00 | 335.00 | 218.93 | NA |
| 2-Methylpropanoic acid | SCFA | 0.00 | 363.49 | 184.98 | NA |
| Pentanoic acid | SCFA | 0.00 | 75.92 | 52.68 | NA |
| 3-Methylbutanoic acid | SCFA | 0.00 | 63.18 | 38.72 | NA |
| 2-Methylbutanoic acid | SCFA | 0.00 | 62.46 | 39.33 | NA |
| 4-Methylvaleric acid | SCFA | 12.86 | 1.59 | 1.20 | NA |
| Hexanoic acid | SCFA | 0.00 | 2.90 | 2.28 | NA |

BA: Bile Acid; SCFA: Short Chain Fatty Acid; ND: Non-Detected; Sd: Standard Deviation; LOQ: Limit of Quantification.

# Table S4. Cramer’s V correlations between treatment group and categorical variables. Associations were tested using Fisher’s exact or Chi-square tests. Cramer’s V indicates effect size, and p < 0.05 was considered significant.

| Group vs. Var | N | Method | chisq | Cramer’s V | p-value | OR |
| --- | --- | --- | --- | --- | --- | --- |
| Antidepressant type  (SSRI_SNRI, Others) | 28 | Fisher’s exact | NA | 0.123 | 0.689 | 0.612 |
| Anxiolytics | 28 | Fisher’s exact | NA | 0.284 | 0.197 | 4.726 |

Var: variable; N: sample size.

# Table S5. Demographic and Clinical Characteristics. Continuous variables are presented as mean ± SD; categorical variables as number (%). All characteristics were measured at baseline, and group classification (Responder vs. Non-responder) was determined based on treatment response at subjects’ last visit (TP1/TP2).

| Characteristics | Non-responder  (N = 11, 39.29%) | Responder  (N = 17, 60.71%) | p-value |
| --- | --- | --- | --- |
| Age (Mean, Sd) | 34.50 (13.90) | 37.9 (14.7) | 0.544 |
| Gender (female, %) | 6 (54.55) | 12 (70.59) | 0.563 |
| BMI (Mean, Sd) | 22.18 (5.28) | 21.29 (4.97) | 0.648 |
| Antidepressant type (SSRI/SNRI, n, %) | 5 (45.45) | 7 (41.18) | 0.826 |
| Other psychotropics use |  |  | 0.536 |
| Anxiolytics (n, %) | 10 (90.91) | 12 (70.59) |  |
| Antipsychotics (n, %) | 2 (18.18) | 0 (0.00) |  |
| Mood stabilizers (n, %) | 0 (0.00) | 0 (0.00) |  |
| Total energy (kcal, Mean, Sd) | 1513.67 (810.64) | 1599.71 (752.21) | 0.959 |
| Protein intake (g, Mean, Sd) | 55.74 (22.77) | 60.04 (24.08) | 0.946 |
| Animal protein intake (g, Mean, Sd) | 30.33 (12.95) | 32.55 (16.03) | 0.914 |
| Plant protein intake (g, Mean, Sd) | 24.16 (14.22) | 25.97 (12.12) | 0.969 |
| Fat intake (g, Mean, Sd) | 48.28 (21.39) | 56.78 (29.38) | 0.602 |
| Animal fat intake (g, Mean, Sd) | 23.82 (9.75) | 26.16 (12.31) | 0.810 |
| Plant fat intake (g, Mean, Sd) | 6.20 (2.83) | 7.76 (3.65) | 0.416 |
| Carbohydrate intake (g, Mean, Sd) | 216.52 (142.82) | 217.59 (109.81) | 0.799 |
| Sugar intake (g, Mean, Sd) | 4.55 (0.99) | 6.21 (3.68) | 0.131 |
| Fructose intake (g, Mean, Sd) | 1.32 (0.92) | 2.34 (1.67) | 0.094 |
| Lactose intake (g, Mean, Sd) | 1.38 (1.30) | 4.17 (5.39) | 0.089 |
| Crude fiber intake (g, Mean, Sd) | 0.27 (0.13) | 0.31 (0.17) | 0.686 |
| Dietary fiber intake (g, Mean, Sd) | 9.65 (4.20) | 12.4 (6.72) | 0.360 |
| HAMD baseline (Mean, Sd) | 17.45 (5.41) | 16.73 (4.85) | 0.729 |
| HAMD time point 1 (Mean, Sd) | 15.82 (4.42) | 9.53 (5.37) | 0.003 |
| HAMD time point 2 (Mean, Sd) | 13.22 (4.68) | 4.14 (4.35) | <0.001 |

Sd: Standard Deviation; N: number of participants; BMI: Body Mass Index; HAMD: Hamilton Depression Rating Scale; BDI: Beck Depression Inventory; PSS: Perceived Stress Scale.

# **Table S6. Targeted taxa identified in Model I at the genus and species levels.** The table summarizes the regression coefficients (Coef.) and p-values (p) of targeted taxa associated with two time points (TP1 and TP2). HAMD score at baseline was controlled by the variable HAMD_BL. Dietary factors were adjusted in the model. The bacterial abundance was normalized through MetaPhlAn and log transformed before fitted into the model.

Model:

| **Level** | **Taxa** | **TP1** | | **TP2** | |
| --- | --- | --- | --- | --- | --- |
| **Coef.** | **p** | **Coef.** | **p** |
| Genus | *Solobacterium* | -5.908 | < 0.001 | -2.990 | 0.074 |
| *Weissella* | -6.121 | 0.005 | -4.603 | 0.038 |
| *Mogibacterium* | -4.466 | 0.008 | -3.063 | 0.072 |
| *Lancefieldella* | -3.695 | 0.021 | -4.503 | 0.007 |
| *Klebsiella* | -4.853 | 0.026 | -6.170 | 0.006 |
| *Candidatus_Cibionibacter* | -0.256 | 0.027 | 0.035 | 0.765 |
| *Lactococcus* | -4.596 | 0.031 | -5.171 | 0.019 |
| *Intestinibacter* | -3.622 | 0.034 | -5.132 | 0.004 |
| *Haemophilus* | -3.755 | 0.035 | -2.062 | 0.254 |
| *Sphingomonas* | 2.218 | 0.045 | 1.861 | 0.100 |
| *Bianquea* | -1.204 | 0.190 | -2.177 | 0.024 |
| *Fusobacterium* | -1.068 | 0.400 | -2.792 | 0.037 |
| Species | *Weissella confusa* | -5.670 | 0.005 | -4.216 | 0.041 |
| *Lactococcus lactis* | -5.284 | 0.007 | -4.519 | 0.023 |
| *Mogibacterium diversum* | -4.461 | 0.011 | -3.773 | 0.035 |
| *Klebsiella pneumoniae* | -4.542 | 0.021 | -6.010 | 0.004 |
| *Candidatu_Cibionibacter quicibialis* | -0.263 | 0.024 | 0.030 | 0.798 |
| *Enterocloster_bolteae* | -1.928 | 0.031 | -0.966 | 0.286 |
| *Actinomyces naeslundii* | -3.375 | 0.032 | -4.049 | 0.013 |
| *Turicibacter bilis* | -3.774 | 0.032 | -0.612 | 0.730 |
| *Weissella cibaria* | -4.347 | 0.033 | -4.892 | 0.020 |
| *Intestinibacter bartlettii* | -3.637 | 0.034 | -5.146 | 0.004 |
| *Lancefieldella parvula* | -3.297 | 0.036 | -3.317 | 0.040 |
| *Streptococcus parasanguinis* | 2.536 | 0.040 | -0.144 | 0.908 |
| *Sphingomonas pseudosanguinis* | 2.215 | 0.045 | 1.870 | 0.099 |
| *Streptococcus thermophilus* | -4.226 | 0.047 | 1.589 | 0.460 |
| *Clostridium leptum* | 0.517 | 0.645 | -3.493 | 0.004 |
| *Actinomyces graevenitzii* | -0.812 | 0.539 | -3.495 | 0.013 |
| *Anaerobutyricum soehngenii* | 0.128 | 0.191 | 0.233 | 0.024 |
| *Lentihominibacter hominis* | 1.402 | 0.223 | 2.717 | 0.025 |
| *Enterococcus faecalis* | -2.558 | 0.134 | -3.995 | 0.025 |
| *Bianquea renquensis* | -1.172 | 0.202 | -2.106 | 0.029 |
| *Clostridium scindens* | -1.164 | 0.266 | -2.364 | 0.032 |
| *Phascolarctobacteriums faecium* | -1.341 | 0.178 | -2.139 | 0.040 |
| *Streptococcus mutans* | -1.029 | 0.456 | -2.975 | 0.041 |

g_: genera; s_: species; TP1: time point one; TP2: time point two; p: p-value

# **Table S7. Targeted taxa in Model II at the genus and species levels.** Regression coefficients (Coef.) and p-values (p) are shown for each taxon with respect to time_numeric (reflecting temporal trajectories) and ΔHAMD (representing changes in depression severity). Dietary factors were adjusted in the model. The bacterial abundance was normalized through MetaPhlAn and log transformed before fitted into the model.

Model:

| **Level** | **Taxa** | **Time numeric** | | **△HAMD** | |
| --- | --- | --- | --- | --- | --- |
| **Coef.** | **p** | **Coef.** | **p** |
| Genus | *Phascolarctobacterium* | -1.842 | 0.003 | -0.226 | 0.017 |
| *Fusicatenibacter* | -1.335 | 0.006 | -0.206 | 0.008 |
| *Anaerostipes* | -0.949 | 0.010 | -0.186 | < 0.001 |
| *Intestinibacter* | -2.886 | 0.020 | -0.065 | 0.722 |
| *Hydrogenoanaerobacterium* | -2.096 | 0.029 | -0.224 | 0.134 |
| *Ruminococcus* | -1.731 | 0.038 | -0.165 | 0.190 |
| *Solobacterium* | -2.649 | 0.039 | -0.200 | 0.293 |
| *Collinsella* | -0.084 | 0.049 | -0.011 | 0.113 |
| *Brevundimonas* | 0.246 | 0.435 | 0.103 | 0.029 |
| *Faecalimonas* | -1.030 | 0.191 | -0.266 | 0.036 |
| Species | *Ruminococcus lactaris* | 1.636 | < 0.001 | 0.255 | < 0.001 |
| *Clostridiaceae bacterium Marseille Q3526* | 1.478 | 0.001 | 0.228 | 0.001 |
| *Phascolarctobacterium faecium* | -2.256 | 0.004 | -0.241 | 0.044 |
| *Alistipes senegalensis* | 1.709 | 0.006 | 0.203 | 0.037 |
| *Actinomyces naeslundii* | -3.166 | 0.007 | -0.232 | 0.188 |
| *Anaerostipes hadrus* | -1.649 | 0.013 | -0.336 | 0.002 |
| *Mogibacterium diversum* | -3.057 | 0.014 | -0.220 | 0.221 |
| *Enterocloster clostridioformis* | 1.436 | 0.018 | 0.172 | 0.073 |
| *Intestinibacter bartlettii* | -2.893 | 0.019 | -0.065 | 0.722 |
| *Clostridium scindens* | -1.830 | 0.028 | -0.132 | 0.310 |
| *Dialister hominis* | -1.508 | 0.028 | -0.297 | 0.007 |
| *Clostridium methylpentosum* | -1.726 | 0.029 | -0.207 | 0.096 |
| *Anaerobutyricum soehngenii* | 0.174 | 0.029 | 0.012 | 0.351 |
| *Weissella confusa* | -2.912 | 0.031 | -0.131 | 0.469 |
| *Lachnospira sp NSJ 43* | 1.512 | 0.040 | 0.294 | 0.013 |
| *Lancefieldella parvula* | -2.336 | 0.041 | -0.121 | 0.467 |
| *Megasphaera sp NM10* | -1.644 | 0.042 | -0.205 | 0.107 |
| *Clostridium leptum* | -1.823 | 0.047 | -0.040 | 0.774 |
| *Enterocloster hominis* | -1.807 | 0.048 | -0.187 | 0.191 |
| *Clostridiaceae bacterium Marseille Q4149* | 0.158 | 0.049 | 0.032 | 0.016 |
| *Alistipes indistinctus* | 1.683 | 0.053 | 0.365 | 0.009 |
| *Cloacibacillus porcorum* | 0.957 | 0.293 | 0.354 | 0.014 |
| *Actinomyces graevenitzii* | 0.032 | 0.973 | 0.366 | 0.018 |
| *Alistipes shahii* | 1.039 | 0.114 | 0.231 | 0.029 |
| *Alistipes communis* | -1.429 | 0.053 | -0.253 | 0.033 |
| *Faecalimonas umbilicata* | -1.036 | 0.189 | -0.267 | 0.035 |
| *Blautia hansenii* | -0.370 | 0.558 | -0.208 | 0.043 |

# Table S8. Targeted taxa identified by the extended Model II (Mundlak approach). The extended Model II decomposed symptom improvement (ΔHAMD) into within-person (ΔHAMD_within) and between-person (ΔHAMD_between) components following the Mundlak specification to separate within- and between-subject effects. The taxa abundance was log-transformed before fitted into the model.

| **Level** | **Taxa** | **Time numeric** | | **△HAMD_within** | |
| --- | --- | --- | --- | --- | --- |
| **Coef.** | **p** | **Coef.** | **p** |
| Genus | *Phascolarctobacterium* | -1.747 | 0.006 | -0.211 | 0.040 |
| *Intestinibacter* | -3.521 | 0.009 | -0.192 | 0.376 |
| *Fusicatenibacter* | -1.272 | 0.009 | -0.190 | 0.016 |
| *Oscillibacter* | -2.650 | 0.018 | -0.499 | 0.008 |
| *Slackia* | -1.985 | 0.022 | -0.264 | 0.059 |
| *Anaerostipes* | -0.955 | 0.023 | -0.193 | 0.006 |
| *Ruminococcus* | -1.976 | 0.026 | -0.222 | 0.123 |
| *Lawsonibacter* | -2.252 | 0.028 | -0.318 | 0.057 |
| *Collinsella* | -0.085 | 0.046 | -0.011 | 0.106 |
| *Lactococcus* | -3.230 | 0.046 | -0.142 | 0.597 |
| *Oscillospiraceae unclassified* | -1.473 | 0.047 | -0.227 | 0.061 |
| *Lachnospira* | -0.376 | 0.407 | -0.354 | 0.023 |
| *Faecalimonas* | -1.113 | 0.165 | -0.290 | 0.028 |
| *Rothia* | 2.248 | 0.114 | 0.512 | 0.032 |
| Species | *Ruminococcus lactaris* | 1.526 | < 0.001 | 0.236 | 0.001 |
| *Clostridiaceae bacterium Marseille Q3526* | 1.449 | 0.001 | 0.219 | 0.002 |
| *Actinomyces naeslundii* | -3.848 | 0.002 | -0.370 | 0.062 |
| *Phascolarctobacterium faecium* | -2.084 | 0.009 | -0.208 | 0.101 |
| *Intestinibacter bartlettii* | -3.531 | 0.009 | -0.193 | 0.375 |
| *Enterocloster clostridioformis* | 1.560 | 0.011 | 0.194 | 0.048 |
| *Dialister hominis* | -1.734 | 0.013 | -0.345 | 0.003 |
| *Mogibacterium diversum* | -3.355 | 0.015 | -0.294 | 0.192 |
| *Clostridium leptum* | -2.323 | 0.015 | -0.137 | 0.368 |
| *Alistipes senegalensis* | 1.473 | 0.018 | 0.160 | 0.108 |
| *Anaerostipes hadrus* | -1.592 | 0.019 | -0.328 | 0.003 |
| *Alistipes communis* | -1.753 | 0.020 | -0.321 | 0.009 |
| *Enterocloster hominis* | -2.129 | 0.023 | -0.263 | 0.082 |
| *Oscillibacter valericigenes* | -2.530 | 0.024 | -0.479 | 0.010 |
| *Clostridium methylpentosum* | -1.820 | 0.025 | -0.227 | 0.082 |
| *Streptococcus mutans* | -2.453 | 0.027 | -0.210 | 0.237 |
| *Clostridium scindens* | -1.826 | 0.031 | -0.139 | 0.302 |
| *Parabacteroides distasonis* | 0.914 | 0.032 | 0.152 | 0.033 |
| *Anaerobutyricum soehngenii* | 0.170 | 0.032 | 0.011 | 0.380 |
| *Megasphaera sp NM10* | -1.640 | 0.047 | -0.206 | 0.121 |
| *Weissella confusa* | -3.095 | 0.048 | -0.189 | 0.468 |
| *Actinomyces graevenitzii* | 0.316 | 0.750 | 0.422 | 0.011 |
| *Clostridiaceae bacterium Marseille Q4149* | 0.156 | 0.052 | 0.031 | 0.017 |
| *Lachnospira sp NSJ 43* | 1.392 | 0.062 | 0.274 | 0.025 |
| *Faecalimonas umbilicata* | -1.120 | 0.163 | -0.291 | 0.028 |
| *Alistipes shahii* | 1.002 | 0.133 | 0.225 | 0.039 |
| *Alistipes indistinctus* | 1.313 | 0.137 | 0.291 | 0.044 |
| *Barnesiella intestinihominis* | -0.103 | 0.101 | -0.020 | 0.047 |
| *Fusicatenibacter sp CLA AA H277* | -1.055 | 0.115 | -0.215 | 0.049 |

# Table S9. Targeted taxa in Model IV at the genus and species levels. Wilcoxon rank sum test for targeting the differential taxa between responder and non-responder at baseline only. Responder and non-responder labels were anchored at TP2. The bacterial abundance was normalized through MetaPhlAn and log transformed before the Wilcoxon test.

| **Level** | **Taxa** | **W_stat** | **W_AUC** | **W_p.value** |
| --- | --- | --- | --- | --- |
| Genus | *Raoultibacter* | 101.0 | 0.802 | 0.015 |
| *Ruminococcus* | 26.0 | 0.206 | 0.021 |
| *Escherichia* | 98.0 | 0.778 | 0.030 |
| *Propionibacterium* | 86.5 | 0.687 | 0.045 |
| *Bifidobacterium* | 95.0 | 0.754 | 0.047 |
| Species | *Raoultibacter timonensis* | 102.0 | 0.810 | 0.011 |
| *Blautia faecis* | 25.0 | 0.198 | 0.018 |
| *Escherichia coli* | 99.0 | 0.786 | 0.025 |
| *Dialister hominis* | 94.5 | 0.750 | 0.027 |
| *Eubacterium sp AF34 35BH* | 93.0 | 0.738 | 0.029 |
| *Bacteroides caccae* | 97.0 | 0.770 | 0.033 |
| *Bacteroides salyersiae* | 92.0 | 0.730 | 0.035 |
| *Actinomyces sp ph3* | 35.0 | 0.278 | 0.042 |
| *Propionibacterium acidifaciens* | 86.5 | 0.687 | 0.045 |

g_: genera; s_: species; W_stat: Wilcoxon statistic; W_AUC: the area under the receiver operating characteristic curve (AUC); W_p.value: the p-value of the test.

# Table S10. Importance scores of Model IV targeted species in the random forest classification model. Random forest analysis was conducted using the species identified in Model IV to evaluate their predictive importance for treatment response classification. Importance scores are normalized to the maximum value of 100. Higher scores indicate greater contribution to distinguishing responders from non-responders.

| **Species** | **Importance score** |
| --- | --- |
| Raoultibacter_timonensis | 100.00 |
| Blautia_faecis | 99.19 |
| Escherichia_coli | 77.67 |
| Dialister_hominis | 52.22 |
| Eubacterium_sp_AF34_35BH | 62.13 |
| Bacteroides_caccae | 76.53 |
| Bacteroides_salyersiae | 20.86 |
| Actinomyces_sp_ph3 | 7.31 |

# Table S11. Bidirectional Δ-based cross-lagged panel model between targeted species and depressive symptom changes. The model evaluated reciprocal temporal effects between changes in microbial abundance and HAMD score across follow-up intervals. The species abundance was log-transformed before fitted into the model.

| **Species** | **lhs, op, rhs** | **Coef.** | **p** |
| --- | --- | --- | --- |
| Clostridiaceae_bacterium_Marseille_Q3526 | TP2 Abund~∆HAMD BL-TP2 | 3.957 | < 0.001* |
| TP2 HAMD~∆Abund BL-TP2 | 3.785 | 0.001* |
| Ruminococcus_lactaris | TP2 HAMD~∆Abund BL-TP2 | 3.877 | 0.001* |
| TP2 Abund~∆HAMD TP1-TP2 | 2.260 | 0.036 |
| TP2 Abund~∆HAMD BL-TP2 | 3.803 | 0.001* |
| TP2 HAMD~∆Abund TP1-TP2 | 2.486 | 0.023 |
| Actinomyces_graevenitzii | TP2 Abund~∆HAMD TP1-TP2 | 3.891 | 0.001* |
| TP2 HAMD~∆Abund TP1-TP2 | 2.889 | 0.010 |
| Anaerostipes_hadrus | TP1 Abund~∆HAMD BL-TP1 | -3.681 | 0.001* |
| TP1 HAMD~∆Abund BL-TP1 | -3.162 | 0.005* |
| Lachnospira_sp_NSJ_43 | TP2 HAMD~∆Abund BL-TP2 | 3.715 | 0.001* |
| TP2 Abund~∆HAMD BL-TP2 | 3.529 | 0.002* |
| Alistipes_indistinctus | TP2 Abund~∆HAMD BL-TP2 | 3.603 | 0.002* |
| TP2 HAMD~∆Abund BL-TP2 | 2.235 | 0.038 |
| Cloacibacillus_porcorum | TP1 Abund~∆HAMD BL-TP1 | 3.529 | 0.002* |
| TP1 HAMD~∆Abund BL-TP1 | 2.919 | 0.008 |
| Dialister_hominis | TP1 HAMD~∆Abund BL-TP1 | -3.200 | 0.004* |
| TP2 HAMD~∆Abund TP1-TP2 | -2.486 | 0.023 |
| TP1 Abund~∆HAMD BL-TP1 | -2.362 | 0.028 |
| TP2 HAMD~∆Abund BL-TP2 | -2.163 | 0.043 |
| Eubacterium_ventriosum | TP2 HAMD~∆Abund BL-TP2 | 3.129 | 0.007 |
| Alistipes_communis | TP1 HAMD~∆Abund BL-TP1 | -2.736 | 0.012 |
| Blautia_hansenii | TP2 Abund~∆HAMD TP1-TP2 | -2.596 | 0.018 |
| TP2 HAMD~∆Abund TP1-TP2 | -2.292 | 0.034 |
| Megasphaera_sp_NM10 | TP1 Abund~∆HAMD BL-TP1 | -2.431 | 0.024 |
| TP1 HAMD~∆Abund BL-TP1 | -2.103 | 0.048 |
| Phascolarctobacterium_faecium | TP1 Abund~∆HAMD BL-TP1 | -2.404 | 0.026 |
| TP1 HAMD~∆Abund BL-TP1 | -2.125 | 0.046 |
| Mogibacterium_diversum | TP2 HAMD~∆Abund BL-TP2 | -2.341 | 0.030 |
| Alistipes_shahii | TP2 Abund~∆HAMD BL-TP2 | 2.336 | 0.031 |
| Enterocloster_clostridioformis | TP2 HAMD~∆Abund BL-TP2 | 2.280 | 0.034 |
| Blautia_glucerasea | TP2 HAMD~∆Abund BL-TP2 | 5.535 | 0.042 |

lhs: Left-hand Side (Dependent variable); op: Operator; rhs: Right-hand Side (Independent variable); Abund: log-Abundance; BL: Baseline; TP1: Time Point One; TP2: Time Point Two; Coef: coefficient of the model; p: p-value. *p.FDR by Benjamini–Hochberg adjustment significant.

# Table S12. Pathways and targeted species time-resolved causal modeling. Regression coefficients (Coef.), nominal p-values (p), and FDR-adjusted q-values (q) are shown. The bacterial and pathway abundance were normalized and log transformed before fitted into the model. The Y represents the pathway abundance fold-change; the X represents the targeted species abundance fold-change .

Model:

| **Y: Pathway** | **X: Species** | **Coef.** | **p** |
| --- | --- | --- | --- |
| guanosine ribonucleotides de novo biosynthesis | *Alistipes_shahii* | -0.009 | < 0.001* |
| inosine 5'-phosphate degradation | *Wansuia_hejianensis* | -0.063 | < 0.001* |
| L-lysine biosynthesis VI | *Alistipes_shahii* | -0.009 | < 0.001* |
| peptidoglycan biosynthesis I (meso-diaminopimelate containing) | *Alistipes_shahii* | -0.008 | < 0.001* |
| S-adenosyl-L-methionine salvage I | *Alistipes_shahii* | -0.010 | < 0.001* |
| superpathway of L-lysine, L-threonine and L-methionine biosynthesis II | *Alistipes_shahii* | -0.008 | < 0.001* |
| superpathway of L-threonine biosynthesis | *Mogibacterium_diversum* | 0.005 | < 0.001* |
| superpathway of UDP-glucose-derived O-antigen building blocks biosynthesis | *Weissella_confusa* | 0.007 | < 0.001* |
| UDP-N-acetylmuramoyl-pentapeptide biosynthesis I (meso-diaminopimelate containing) | *Alistipes_shahii* | -0.007 | < 0.001* |
| UDP-N-acetylmuramoyl-pentapeptide biosynthesis II (lysine-containing) | *Alistipes_shahii* | -0.008 | < 0.001* |
| UMP biosynthesis I | *Alistipes_shahii* | -0.008 | < 0.001* |
| UMP biosynthesis II | *Alistipes_shahii* | -0.008 | < 0.001* |

Coef: Coefficient; p: p-value; *p.FDR by Benjamini–Hochberg adjustment significant.

# Table S13. Top species-level functional contributions to targeted metabolic pathways. Species-level contributions to key (targeted) functional pathways were estimated using HUMAnN3. Only species with ≥ 1% contribution are shown.

| **Pathways** | **Species** | **mean_frac** | **mean_prop** |
| --- | --- | --- | --- |
| guanosine ribonucleotides de novo biosynthesis | *Ruminococcus bromii* | 0.034 | 0.032 |
| *Prevotella copri* | 0.028 | 0.027 |
| *Roseburia faecis* | 0.013 | 0.012 |
| *Megamonas funiformis* | 0.013 | 0.013 |
| inosine 5'-phosphate degradation | *Klebsiella pneumoniae* | 0.020 | 0.016 |
| *Roseburia faecis* | 0.017 | 0.015 |
| *Roseburia inulinivorans* | 0.016 | 0.013 |
| *Streptococcus salivarius* | 0.012 | 0.010 |
| L-lysine biosynthesis VI | *Ruminococcus bromii* | 0.040 | 0.037 |
| *Prevotella copri* | 0.018 | 0.015 |
| *Megamonas funiformis* | 0.017 | 0.014 |
| *Klebsiella pneumoniae* | 0.013 | 0.011 |
| peptidoglycan biosynthesis I (meso-diaminopimelate containing) | *Prevotella copri* | 0.023 | 0.023 |
| *Megamonas funiformis* | 0.014 | 0.013 |
| *Roseburia faecis* | 0.014 | 0.013 |
| *Klebsiella pneumoniae* | 0.012 | 0.012 |
| S-adenosyl-L-methionine salvage I | *Ruminococcus bromii* | 0.046 | 0.044 |
| *Roseburia faecis* | 0.015 | 0.015 |
| *Klebsiella pneumoniae* | 0.012 | 0.012 |
| *Subdoligranulum sp* | 0.011 | 0.011 |
| *Prevotella sp 885* | 0.010 | 0.010 |
| superpathway of L-lysine, L-threonine and L-methionine biosynthesis II | *Roseburia inulinivorans* | 0.012 | 0.009 |
| *Klebsiella pneumoniae* | 0.011 | 0.009 |
| *Roseburia hominis* | 0.010 | 0.009 |
| superpathway of L-threonine biosynthesis | *Klebsiella pneumoniae* | 0.024 | 0.021 |
| *Streptococcus salivarius* | 0.016 | 0.013 |
| *Roseburia hominis* | 0.011 | 0.010 |
| UDP-N-acetylmuramoyl-pentapeptide biosynthesis I (meso-diaminopimelate containing) | *Prevotella copri* | 0.023 | 0.022 |
| *Megamonas funiformis* | 0.014 | 0.013 |
| *Roseburia faecis* | 0.014 | 0.013 |
| *Klebsiella pneumoniae* | 0.012 | 0.012 |
| UDP-N-acetylmuramoyl-pentapeptide biosynthesis II (lysine-containing) | *Prevotella copri* | 0.022 | 0.021 |
| *Megamonas funiformis* | 0.014 | 0.014 |
| *Roseburia faecis* | 0.014 | 0.012 |
| UMP biosynthesis I | *Prevotella copri* | 0.021 | 0.020 |
| *Megamonas funiformis* | 0.017 | 0.016 |
| *Roseburia faecis* | 0.015 | 0.014 |
| *Klebsiella pneumoniae* | 0.012 | 0.011 |
| UMP biosynthesis II | *Prevotella copri* | 0.021 | 0.020 |
| *Megamonas funiformis* | 0.017 | 0.016 |
| *Roseburia faecis* | 0.015 | 0.014 |

mean_frac: the mean fractional contribution per sample; mean_prop: the average proportional abundance across subjects.

# Table S14. Functional contribution of targeted species to targeted pathways. Species-level targeted taxa contributions to key (targeted) functional pathways were estimated using HUMAnN3.

| **Pathways** | **Species** | **mean_frac** | **mean_prop** |
| --- | --- | --- | --- |
| guanosine ribonucleotides de novo biosynthesis | Clostridium scindens | 0.000377 | 0.000366 |
| Megamonas funiformis | 0.012615 | 0.013263 |
| Phascolarctobacterium faecium | 0.008273 | 0.008269 |
| Ruminococcus lactaris | 0.001023 | 0.000985 |
| Streptococcus sanguinis | 0.000052 | 0.000050 |
| Weissella confusa | 0.000215 | 0.000206 |
| inosine 5'-phosphate degradation | Clostridium scindens | 0.000222 | 0.000193 |
| Streptococcus sanguinis | 0.000089 | 0.000077 |
| L-lysine biosynthesis VI | Clostridium scindens | 0.000436 | 0.000381 |
| Megamonas funiformis | 0.016548 | 0.014499 |
| Ruminococcus lactaris | 0.001244 | 0.001159 |
| peptidoglycan biosynthesis I (meso-diaminopimelate containing) | Clostridium scindens | 0.000346 | 0.000333 |
| *Megamonas funiformis* | 0.013832 | 0.013493 |
| *Phascolarctobacterium faecium* | 0.007128 | 0.006846 |
| *Ruminococcus lactaris* | 0.001134 | 0.001033 |
| *Streptococcus sanguinis* | 0.000047 | 0.000046 |
| *Weissella confusa* | 0.000236 | 0.000229 |
| S-adenosyl-L-methionine salvage I | *Clostridium scindens* | 0.00035 | 0.000344 |
| *Ruminococcus lactaris* | 0.001592 | 0.001539 |
| *Streptococcus sanguinis* | 0.000059 | 0.000057 |
| *Weissella confusa* | 0.000339 | 0.000321 |
| superpathway of L-lysine, L-threonine and L-methionine biosynthesis II | *Clostridium scindens* | 0.000554 | 0.000421 |
| superpathway of L-threonine biosynthesis | *Streptococcus sanguinis* | 0.000074 | 0.000064 |
| UDP-N-acetylmuramoyl-pentapeptide biosynthesis I (meso-diaminopimelate containing) | *Clostridium scindens* | 0.000344 | 0.000323 |
| *Megamonas funiformis* | 0.01382 | 0.013462 |
| *Phascolarctobacterium faecium* | 0.007015 | 0.006689 |
| *Ruminococcus lactaris* | 0.001148 | 0.001047 |
| *Streptococcus sanguinis* | 0.000045 | 0.000044 |
| *Weissella confusa* | 0.000238 | 0.000234 |
| UDP-N-acetylmuramoyl-pentapeptide biosynthesis II (lysine-containing) | *Clostridium scindens* | 0.000335 | 0.000314 |
| *Megamonas funiformis* | 0.014298 | 0.013584 |
| *Phascolarctobacterium faecium* | 0.006942 | 0.006547 |
| *Ruminococcus lactaris* | 0.001142 | 0.001031 |
| *Streptococcus sanguinis* | 0.000046 | 0.000045 |
| *Weissella confusa* | 0.000242 | 0.000221 |
| UMP biosynthesis I | *Clostridium scindens* | 0.000391 | 0.000364 |
| *Megamonas funiformis* | 0.017017 | 0.016227 |
| *Phascolarctobacterium faecium* | 0.007214 | 0.006809 |
| *Ruminococcus lactaris* | 0.001388 | 0.001256 |
| *Streptococcus sanguinis* | 0.000033 | 0.000032 |
| *Weissella confusa* | 0.000239 | 0.000213 |
| UMP biosynthesis II | *Clostridium scindens* | 0.000398 | 0.000364 |
| *Megamonas funiformis* | 0.017306 | 0.016227 |
| *Phascolarctobacterium faecium* | 0.007218 | 0.006809 |
| *Ruminococcus lactaris* | 0.001398 | 0.001256 |
| *Streptococcus sanguinis* | 0.000042 | 0.000041 |
| *Weissella confusa* | 0.000233 | 0.000213 |

mean_frac: the mean fractional contribution per sample; mean_prop: the average proportional abundance across subjects.

# Table S15. Functional contribution of targeted species to targeted pathways by groups. Species-level targeted taxa contributions to key (targeted) functional pathways were estimated using HUMAnN3.

| **Pathways** | **Species** | **group** | **mean_prop** |
| --- | --- | --- | --- |
| guanosine ribonucleotides de novo biosynthesis | *Clostridium_leptum* | NR | 0.000425 |
| *Clostridium_leptum* | R | 0.000747 |
| *Clostridium_scindens* | R | 0.000174 |
| *Megamonas_funiformis* | NR | 0.015739 |
| *Megamonas_funiformis* | R | 0.020339 |
| *Phascolarctobacterium_faecium* | NR | 0.004124 |
| *Phascolarctobacterium_faecium* | R | 0.014828 |
| *Ruminococcus_lactaris* | NR | 0.002281 |
| *Ruminococcus_lactaris* | R | 0.001219 |
| *Streptococcus_sanguinis* | R | 0.000060 |
| inosine 5'-phosphate degradation | *Streptococcus_sanguinis* | R | 0.000067 |
| L-lysine biosynthesis VI | *Clostridium_leptum* | NR | 0.000559 |
| *Clostridium_leptum* | R | 0.001000 |
| *Clostridium_scindens* | R | 0.000214 |
| *Megamonas_funiformis* | NR | 0.016817 |
| *Megamonas_funiformis* | R | 0.020520 |
| *Ruminococcus_lactaris* | NR | 0.002829 |
| *Ruminococcus_lactaris* | R | 0.001417 |
| peptidoglycan biosynthesis I (meso-diaminopimelate containing) | *Clostridium_leptum* | NR | 0.000432 |
| *Clostridium_leptum* | R | 0.000754 |
| *Clostridium_scindens* | R | 0.000198 |
| *Megamonas_funiformis* | NR | 0.017150 |
| *Megamonas_funiformis* | R | 0.018487 |
| *Phascolarctobacterium_faecium* | NR | 0.003487 |
| *Phascolarctobacterium_faecium* | R | 0.011571 |
| *Ruminococcus_lactaris* | NR | 0.002601 |
| *Ruminococcus_lactaris* | R | 0.001268 |
| *Streptococcus_sanguinis* | R | 0.000053 |
| S-adenosyl-L-methionine salvage I | *Clostridium_leptum* | NR | 0.000502 |
| *Clostridium_leptum* | R | 0.001062 |
| *Clostridium_scindens* | R | 0.000215 |
| *Ruminococcus_lactaris* | NR | 0.003966 |
| *Ruminococcus_lactaris* | R | 0.001776 |
| *Streptococcus_sanguinis* | R | 0.000110 |
| superpathway of L-lysine, L-threonine and L-methionine biosynthesis II | *Clostridium_leptum* | NR | 0.000599 |
| *Clostridium_leptum* | R | 0.001028 |
| *Clostridium_scindens* | R | 0.000260 |
| superpathway of L-threonine biosynthesis | *Streptococcus_sanguinis* | R | 0.000078 |
| UDP-N-acetylmuramoyl-pentapeptide biosynthesis I (meso-diaminopimelate containing) | *Clostridium_leptum* | NR | 0.000418 |
| *Clostridium_leptum* | R | 0.000729 |
| *Clostridium_scindens* | R | 0.000186 |
| *Megamonas_funiformis* | NR | 0.016958 |
| *Megamonas_funiformis* | R | 0.018240 |
| *Phascolarctobacterium_faecium* | NR | 0.003426 |
| *Phascolarctobacterium_faecium* | R | 0.011217 |
| *Ruminococcus_lactaris* | NR | 0.002611 |
| *Ruminococcus_lactaris* | R | 0.001275 |
| *Streptococcus_sanguinis* | R | 0.000052 |
| *Clostridium_leptum* | NR | 0.000431 |
| *Clostridium_leptum* | R | 0.000727 |
| *Clostridium_scindens* | R | 0.000172 |
| *Megamonas_funiformis* | NR | 0.016818 |
| *Megamonas_funiformis* | R | 0.018454 |
| *Phascolarctobacterium_faecium* | NR | 0.003330 |
| *Phascolarctobacterium_faecium* | R | 0.011045 |
| *Ruminococcus_lactaris* | NR | 0.002527 |
| *Ruminococcus_lactaris* | R | 0.001273 |
| *Streptococcus_sanguinis* | R | 0.000047 |
| UMP biosynthesis I | *Clostridium_leptum* | NR | 0.000357 |
| *Clostridium_leptum* | R | 0.000573 |
| *Clostridium_scindens* | R | 0.000204 |
| *Megamonas_funiformis* | NR | 0.019206 |
| *Megamonas_funiformis* | R | 0.020712 |
| *Phascolarctobacterium_faecium* | NR | 0.003290 |
| *Phascolarctobacterium_faecium* | R | 0.011481 |
| *Ruminococcus_lactaris* | NR | 0.003100 |
| *Ruminococcus_lactaris* | R | 0.001420 |
| *Streptococcus_sanguinis* | R | 0.000043 |
| UMP biosynthesis II | *Clostridium_leptum* | NR | 0.000357 |
| *Clostridium_leptum* | R | 0.000573 |
| *Clostridium_scindens* | R | 0.000204 |
| *Megamonas_funiformis* | NR | 0.019206 |
| *Megamonas_funiformis* | R | 0.020712 |
| *Phascolarctobacterium_faecium* | NR | 0.003290 |
| *Phascolarctobacterium_faecium* | R | 0.011481 |
| *Ruminococcus_lactaris* | NR | 0.003100 |
| *Ruminococcus_lactaris* | R | 0.001420 |
| *Streptococcus_sanguinis* | R | 0.000053 |

# Table S16. Spearman correlation between targeted bacterial species and fecal metabolites. Significant Spearman correlations (p < 0.05) are presented for targeted bacterial species versus metabolites, including bile acids and short chain fatty acids. The species abundance and the metabolite levels were log-transformed before conducting the correlation analysis.

| **Metabolites** | **Species** | **Rho** | **p** |
| --- | --- | --- | --- |
| 3α-hydroxy-12 ketolithocholic acid | *Blautia_producta* | 0.383 | 0.022 |
| *Intestinibacter_bartlettii* | 0.334 | 0.049 |
| 3α-hydroxy-7 ketolithocholic acid | *Weissella_confusa* | -0.546 | < 0.001* |
| 3-Ketocholanic acid | *Alistipes_indistinctus* | 0.384 | 0.022 |
| *Alistipes_shahii* | 0.390 | 0.020 |
| *Blautia_producta* | 0.425 | 0.010 |
| *Catenibacterium_tridentinum* | -0.356 | 0.035 |
| *Clostridium_methylpentosum* | 0.424 | 0.011 |
| *Faecalicatena_contorta* | 0.357 | 0.035 |
| 5-Cholenic acid-3β-ol | *Ruminococcus_lactaris* | -0.336 | 0.048 |
| Chenodeoxycholic acid | *Blautia_producta* | -0.432 | 0.013 |
| *Clostridium_leptum* | -0.366 | 0.039 |
| *Wansuia_hejianensis* | -0.392 | 0.026 |
| *Weissella_confusa* | -0.501 | 0.003 |
| Cholic acid | *Blautia_producta* | -0.457 | 0.005 |
| *Intestinibacter_bartlettii* | -0.373 | 0.027 |
| *Wansuia_hejianensis* | -0.388 | 0.021 |
| *Weissella_confusa* | -0.437 | 0.008 |
| Deoxycholic acid | *Clostridiaceae_bacterium_Marseille_Q3526* | -0.460 | 0.005 |
| Glycochenodeoxycholic acid | *Anaerobutyricum_soehngenii* | -0.383 | 0.036 |
| *Clostridiaceae_bacterium_Marseille_Q3526* | -0.377 | 0.039 |
| *Phascolarctobacterium_faecium* | -0.501 | 0.004* |
| Glycocholic acid | *Blautia_producta* | -0.376 | 0.033 |
| *Hungatella_hathewayi* | -0.351 | 0.049 |
| *Phascolarctobacterium_faecium* | -0.415 | 0.017 |
| Glycodeoxycholic acid | *Alistipes_senegalensis* | -0.368 | 0.029 |
| *Dialister_hominis* | 0.361 | 0.032 |
| Glycolithocholic acid | *Clostridium_saudiense* | -0.492 | 0.002 |
| *Intestinibacter_bartlettii* | -0.342 | 0.044 |
| *Lachnospira_sp_NSJ_43* | 0.380 | 0.024 |
| *Mogibacterium_diversum* | -0.375 | 0.026 |
| Glycoursodeoxycholic acid | *Hungatella_hathewayi* | -0.563 | 0.003 |
| *Lachnospira_sp_NSJ_43* | -0.418 | 0.037 |
| *Streptococcus_sanguinis* | -0.407 | 0.043 |
| *Weissella_confusa* | -0.571 | 0.002 |
| Hyodeoxycholic acid | *Phascolarctobacterium_faecium* | -0.487 | 0.008 |
| Isolithocholic acid | *Alistipes_shahii* | 0.484 | 0.003 |
| *Blautia_producta* | 0.372 | 0.027 |
| *Catenibacterium_tridentinum* | -0.403 | 0.016 |
| *Clostridium_leptum* | 0.380 | 0.024 |
| *Clostridium_scindens* | 0.375 | 0.026 |
| Lithocholic acid | *Alistipes_shahii* | 0.347 | 0.040 |
| *Blautia_hansenii* | -0.473 | 0.004 |
| *Faecalicatena_contorta* | 0.353 | 0.037 |
| *Megasphaera_sp_NM10* | -0.337 | 0.048 |
| Taurochenodeoxycholic acid | *Blautia_hansenii* | 0.526 | 0.001 |
| *Blautia_producta* | -0.347 | 0.044 |
| *Faecalicatena_contorta* | -0.381 | 0.026 |
| *Phascolarctobacterium_faecium* | -0.519 | 0.001 |
| Taurocholic acid | *Blautia_hansenii* | 0.483 | 0.003 |
| *Blautia_producta* | -0.347 | 0.041 |
| *Clostridiaceae_bacterium_Marseille_Q3526* | -0.469 | 0.004 |
| *Enterocloster_hominis* | -0.340 | 0.045 |
| *Hungatella_hathewayi* | -0.391 | 0.020 |
| *Phascolarctobacterium_faecium* | -0.378 | 0.025 |
| Taurodeoxycholic acid | *Wansuia_hejianensis* | -0.488 | 0.006 |
| Ursocholic acid | *Weissella_confusa* | -0.473 | 0.005 |
| Formic acid | *Alistipes_indistinctus* | 0.336 | 0.042 |
| *Hungatella_hathewayi* | 0.514 | < 0.001 |
| *Weissella_confusa* | 0.350 | 0.033 |
| Acetic acid | *Clostridium_leptum* | -0.341 | 0.038 |
| *Clostridium_methylpentosum* | -0.364 | 0.026 |
| *Eubacterium_ventriosum* | 0.328 | 0.047 |
| *Megamonas_funiformis* | 0.413 | 0.010 |
| Propanoic acid | *Alistipes_indistinctus* | -0.491 | 0.002 |
| *Faecalicatena_contorta* | -0.338 | 0.040 |
| *Mogibacterium_diversum* | -0.329 | 0.046 |
| Butyric acid | *Alistipes_indistinctus* | -0.435 | 0.007 |
| *Faecalicatena_contorta* | -0.353 | 0.031 |
| *Intestinibacter_bartlettii* | -0.325 | 0.049 |
| *Wansuia_hejianensis* | -0.486 | 0.002 |
| 2-Methylpropanoic acid | *Blautia_producta* | 0.451 | 0.005 |
| *Catenibacterium_tridentinum* | -0.325 | 0.049 |
| *Clostridium_leptum* | 0.343 | 0.037 |
| *Hungatella_hathewayi* | 0.341 | 0.038 |
| Pentanoic acid | *Enterocloster_hominis* | 0.342 | 0.038 |
| *Hungatella_hathewayi* | 0.375 | 0.022 |
| 3-Methylbutanoic acid | *Blautia_producta* | 0.581 | < 0.001* |
| *Clostridium_scindens* | 0.328 | 0.047 |
| *Faecalicatena_contorta* | 0.347 | 0.035 |
| *Hungatella_hathewayi* | 0.432 | 0.007 |
| 2-Methylbutanoic acid | *Blautia_producta* | 0.575 | < 0.001* |
| *Clostridium_scindens* | 0.380 | 0.020 |
| *Faecalicatena_contorta* | 0.397 | 0.014 |
| *Hungatella_hathewayi* | 0.503 | 0.001 |
| *Megamonas_funiformis* | -0.368 | 0.024 |
| *Wansuia_hejianensis* | 0.347 | 0.035 |
| 4-Methylvaleric acid | *Anaerobutyricum_soehngenii* | 0.366 | 0.025 |
| *Blautia_hansenii* | -0.411 | 0.011 |
| *Intestinibacter_bartlettii* | -0.446 | 0.005 |
| Hexanoic acid | *Clostridium_leptum* | -0.416 | 0.010 |

p: p-value; *p.FDR by Benjamini–Hochberg adjustment significant.

# **Table S17. Mediation analysis of multiomics features.** The table summarizes the serial mediation analyses evaluating whether changes in targeted metabolites (M₁) and proteins (M₂) sequentially mediated the association between microbial fold-changes (X) and treatment response (Y). Delta values were calculated as the difference between the final follow-up and baseline. P-values were obtained from nonparametric bootstrap resampling (n = 1000). Pairs with effective sample size < 10 or zero delta variation were excluded. Microbial abundances, metabolite levels, and protein intensities were normalized and log-transformed prior to analysis.

| **X** | **M1** | **M2** | **Est.** | **p** |
| --- | --- | --- | --- | --- |
| Barnesiella_intestinihominis | Glycolithocholic_acid | CD2 | 0.728 | 0.023 |
| Barnesiella_intestinihominis | Glycolithocholic_acid | DEFA6 | -0.627 | 0.039 |
| Barnesiella_intestinihominis | Hexanoic_acid | LILRA6 | 0.546 | 0.032 |
| Barnesiella_intestinihominis | Lithocholic_acid | CD2 | 0.553 | 0.039 |
| Barnesiella_intestinihominis | Lithocholic_acid | DEFA6 | 1.312 | 0.026 |
| Barnesiella_intestinihominis | Lithocholic_acid | KLK3 | 0.958 | 0.005 |
| Cloacibacillus_porcorum | 3α-Hydroxy-12 Ketolithocholic Acid | CDH17 | 1.414 | 0.007 |
| Cloacibacillus_porcorum | 3α-Hydroxy-12 Ketolithocholic Acid | REG1B | 0.835 | 0.041 |
| Cloacibacillus_porcorum | 5β-Cholanic Acid-3β, 12α-diol | ABHD12B | 0.786 | 0.019 |
| Cloacibacillus_porcorum | 5β-Cholanic Acid-3β, 12α-diol | AIRE | 0.910 | 0.029 |
| Cloacibacillus_porcorum | 5B_Cholanic_acid_3B_12a_diol | CD2 | -0.756 | 0.033 |
| Cloacibacillus_porcorum | Glycolithocholic_acid | AATK | 0.990 | 0.032 |
| Cloacibacillus_porcorum | Glycolithocholic_acid | DLX2 | 0.644 | 0.041 |
| Cloacibacillus_porcorum | Hexanoic_acid | CCL28 | 1.142 | 0.040 |
| Cloacibacillus_porcorum | Hexanoic_acid | HSPA1L | -0.916 | 0.019 |
| Cloacibacillus_porcorum | Hexanoic_acid | IGF1 | 0.917 | 0.017 |
| Cloacibacillus_porcorum | Hexanoic_acid | NRG1 | -1.137 | 0.006 |
| Cloacibacillus_porcorum | Hexanoic_acid | PGLYRP1 | 0.843 | 0.027 |
| Cloacibacillus_porcorum | Hexanoic_acid | PLVAP | -1.702 | 0.016 |
| Cloacibacillus_porcorum | Isolithocholic_acid | ABHD12B | 0.988 | 0.029 |
| Cloacibacillus_porcorum | Isolithocholic_acid | GCA | -1.187 | 0.037 |
| Cloacibacillus_porcorum | Isolithocholic_acid | HOXB8 | 1.589 | 0.000* |
| Cloacibacillus_porcorum | Isolithocholic_acid | NRG1 | -1.455 | 0.027 |
| Clostridiaceae_bacterium_Marseille_Q4149 | 5β-Cholanic Acid-3β, 12α-diol | ABHD12B | 1.697 | 0.041 |
| Clostridiaceae_bacterium_Marseille_Q4149 | Butyric_acid | AATK | -0.882 | 0.024 |
| Clostridiaceae_bacterium_Marseille_Q4149 | Butyric_acid | ADIPOQ | 1.066 | 0.033 |
| Clostridiaceae_bacterium_Marseille_Q4149 | Butyric_acid | HOXB8 | -1.489 | 0.030 |
| Clostridiaceae_bacterium_Marseille_Q4149 | Butyric_acid | IGF1 | -0.749 | 0.039 |
| Clostridiaceae_bacterium_Marseille_Q4149 | Butyric_acid | PGLYRP1 | -1.416 | 0.016 |
| Clostridiaceae_bacterium_Marseille_Q4149 | Deoxycholic_acid | SRSF6 | 2.087 | 0.044 |
| Dialister_hominis | 3α-Hydroxy-12 Ketolithocholic Acid | SHKBP1 | -0.696 | 0.036 |
| Dialister_hominis | Hexanoic_acid | ADIPOQ | 1.036 | 0.020 |
| Dialister_hominis | Hexanoic_acid | CYP2S1 | 1.575 | 0.001* |
| Dialister_hominis | Hexanoic_acid | LILRA6 | 1.063 | 0.011 |
| Dialister_hominis | Hexanoic_acid | PZP | 1.018 | 0.031 |
| Dialister_hominis | Hexanoic_acid | REG1B | 1.287 | 0.005 |
| Dialister_hominis | Hexanoic_acid | SRP19 | 1.552 | 0.008 |
| Faecalimonas_umbilicata | 5β-Cholanic Acid-3β, 12α-diol | CD2 | 1.090 | 0.020 |
| Faecalimonas_umbilicata | 5β-Cholanic Acid-3β, 12α-diol | NRG1 | 0.953 | 0.045 |
| Faecalimonas_umbilicata | Butyric_acid | AATK | -0.689 | 0.043 |
| Faecalimonas_umbilicata | Glycolithocholic_acid | ADIPOQ | 0.471 | 0.048 |
| Megamonas_funiformis | Lithocholic_acid | AIRE | 1.339 | 0.009 |
| Megamonas_funiformis | Lithocholic_acid | CD2 | 0.736 | 0.047 |
| Megamonas_funiformis | Lithocholic_acid | LILRA6 | -0.681 | 0.049 |
| Megasphaera_sp_NM10 | 5β-Cholanic Acid-3β, 12α-diol | PZP | 0.751 | 0.027 |
| Megasphaera_sp_NM10 | Deoxycholic_acid | PZP | 0.668 | 0.033 |
| Megasphaera_sp_NM10 | Glycolithocholic_acid | CAMP | 0.767 | 0.049 |
| Megasphaera_sp_NM10 | Glycolithocholic_acid | FAM86C1P | 0.945 | 0.013 |
| Megasphaera_sp_NM10 | Glycolithocholic_acid | HSPA1L | 2.077 | 0.004 |
| Megasphaera_sp_NM10 | Glycolithocholic_acid | KLK3 | 1.273 | 0.008 |
| Megasphaera_sp_NM10 | Glycolithocholic_acid | SHKBP1 | 1.657 | 0.015 |
| Megasphaera_sp_NM10 | Hexanoic_acid | CAMP | 0.821 | 0.009 |
| Megasphaera_sp_NM10 | Hexanoic_acid | CDH17 | 0.798 | 0.046 |
| Megasphaera_sp_NM10 | Hexanoic_acid | FAM86C1P | 0.917 | 0.006 |
| Megasphaera_sp_NM10 | Hexanoic_acid | KLK3 | 1.879 | 0.001* |
| Megasphaera_sp_NM10 | Hexanoic_acid | NRG1 | 0.866 | 0.024 |
| Megasphaera_sp_NM10 | Hexanoic_acid | PLVAP | 2.023 | 0.011 |
| Megasphaera_sp_NM10 | Hexanoic_acid | PZP | 0.779 | 0.037 |

M1: Mediator 1 (Metabolites); M2: Mediator 2 (Proteins); Est: Estimates; p: p-value; *p.FDR by Benjamini–Hochberg adjustment significant.

# Table S18. Reactome pathway enrichment analysis of targeted proteins. Enrichment statistics include the number of overlapping proteins (Overlap), the odds ratio (OR), which quantifies the over-representation of proteins in each pathway relative to background expectation, and a combined score that integrates the magnitude of enrichment (OR) with pathway size to prioritize robust signals. P-values were derived from the enrichment test, and pathways shown meet the significance threshold (p < 0.05).

| **Pathwyas** | **Overlap** | **OR** | **Score** | **p** | **Protein Genes** |
| --- | --- | --- | --- | --- | --- |
| Immune System | 46/2150 | 1.910 | 16.715 | < 0.001* | SERPINB10;FCN1;REG3A;GRN;CUL2;IL5RA;SLA;RNF7;UBE2J1;MUC1;RACGAP1;PSMB1;TIFA;  ABL1;IL12B;CTSH;PGLYRP1;PRSS3;RNF130;CD300LG;CAMP;MICA;HLA-DPA1;IL13RA1;AOC1;  DEFB104A;IFNA14;VCAM1;CR1;HSPA1L;GCA;DEFA6;KIR2DS2;UBE2G1;KCTD6;FBXO30;GH2;  UBE2S;IL1B;IRF1;CD207;IL3RA;TLR10;CD300C;FTL;NFKBIB |
| Uptake of Dietary Cobalamins Into Enterocytes | 3/10 | 34.539 | 292.176 | < 0.001* | PRSS1;CTRB2;PRSS3 |
| Degradation of the Extracellular Matrix | 8/140 | 4.955 | 39.215 | < 0.001* | MMP12;PRSS1;SCUBE1;MMP7;CTRB2;CAPN2;MMP19;PLG |
| Activation of Matrix Metalloproteinases | 4/33 | 11.149 | 80.808 | 0.001* | PRSS1;MMP7;CTRB2;PLG |
| Antimicrobial Peptides | 6/95 | 5.478 | 36.908 | 0.001* | REG3A;DEFB104A;DEFA6;PGLYRP1;PRSS3;CAMP |
| Cobalamin (Cbl, Vitamin B12) Transport and Metabolism | 3/22 | 12.717 | 76.521 | 0.002 | PRSS1;CTRB2;PRSS3 |
| Glycerophospholipid Catabolism | 2/7 | 32.109 | 185.612 | 0.003 | GDPD1;PNPLA6 |
| HS-GAG Degradation | 3/24 | 11.505 | 66.292 | 0.003 | IDUA;GPC2;SGSH |
| Regulation of IGF Transport and Uptake by Insulin-like Growth Factor Binding Proteins (IGFBPs) | 6/124 | 4.125 | 22.267 | 0.005 | IGFBP5;KLK3;PLG;APOE;IGF1;MSLN |
| Alpha-defensins | 2/10 | 20.065 | 101.190 | 0.006 | DEFA6;PRSS3 |
| Nuclear Signaling by ERBB4 | 3/32 | 8.328 | 41.127 | 0.007 | NRG1;APOE;GFAP |
| Mucopolysaccharidoses | 2/11 | 17.835 | 86.509 | 0.008 | IDUA;SGSH |
| Adaptive Immune System | 19/854 | 1.880 | 8.600 | 0.010 | VCAM1;KIR2DS2;CUL2;UBE2G1;RNF7;KCTD6;FBXO30;UBE2J1;RACGAP1;UBE2S;CD207;PSMB1;  CTSH;CD300C;RNF130;CD300LG;MICA;HLA-DPA1;NFKBIB |
| RHO GTPase Effectors | 9/291 | 2.600 | 11.793 | 0.011 | SGO2;NUDC;DVL1;CTNNA1;ABL1;KLK3;B9D2;CFTR;NDEL1 |
| Antigen Processing Ubiquitination & Proteasome Degradation | 9/296 | 2.554 | 11.322 | 0.012 | UBE2S;PSMB1;CUL2;UBE2G1;RNF7;RNF130;KCTD6;FBXO30;UBE2J1 |
| Mitotic Spindle Checkpoint | 5/111 | 3.814 | 16.722 | 0.012 | SGO2;NUDC;UBE2S;B9D2;NDEL1 |
| Extracellular Matrix Organization | 9/300 | 2.518 | 10.962 | 0.013 | MMP12;PRSS1;SCUBE1;VCAM1;MMP7;CTRB2;CAPN2;MMP19;PLG |
| Interleukin-4 and Interleukin-13 Signaling | 5/112 | 3.778 | 16.430 | 0.013 | MUC1;VCAM1;IL1B;IL12B;IL13RA1 |
| Innate Immune System | 23/1149 | 1.691 | 6.963 | 0.016 | SERPINB10;FCN1;REG3A;GRN;AOC1;DEFB104A;IFNA14;CR1;GCA;DEFA6;KIR2DS2;MUC1;IL1B;  PSMB1;TIFA;ABL1;CTSH;TLR10;PGLYRP1;PRSS3;CAMP;FTL;NFKBIB |
| Neutrophil Degranulation | 12/478 | 2.104 | 8.626 | 0.017 | SERPINB10;FCN1;GRN;AOC1;CR1;GCA;PSMB1;CTSH;PGLYRP1;PRSS3;CAMP;FTL |
| MAPK Family Signaling Cascades | 9/314 | 2.401 | 9.805 | 0.017 | SPRED2;PSPN;GDNF;PSMB1;IL3RA;IL5RA;MAPKAPK5;NRG1;FGF1 |
| Cytokine Signaling in Immune System | 17/776 | 1.842 | 7.502 | 0.017 | IFNA14;VCAM1;HSPA1L;IL5RA;SLA;RNF7;GH2;MUC1;IL1B;IRF1;PSMB1;IL3RA;TIFA;IL12B;  HLA-DPA1;IL13RA1;NFKBIB |
| RAF MAP Kinase Cascade | 8/265 | 2.529 | 10.172 | 0.018 | SPRED2;PSPN;GDNF;PSMB1;IL3RA;IL5RA;NRG1;FGF1 |
| Class I MHC Mediated Antigen Processing & Presentation | 10/373 | 2.244 | 8.963 | 0.018 | UBE2S;CD207;PSMB1;CUL2;UBE2G1;RNF7;RNF130;KCTD6;FBXO30;UBE2J1 |
| MAPK1 MAPK3 Signaling | 8/271 | 2.470 | 9.642 | 0.020 | SPRED2;PSPN;GDNF;PSMB1;IL3RA;IL5RA;NRG1;FGF1 |
| Pre-NOTCH Processing in Golgi | 2/18 | 10.028 | 38.955 | 0.021 | NOTCH2;RFNG |
| Signal Transduction | 44/2613 | 1.443 | 5.588 | 0.021 | NOTCH2;CCL13;PLXND1;PTH;IL5RA;KLK3;PLG;PTN;RFNG;FGF1;NTF4;SPRED2;RACGAP1;NPW;  DNER;PSMB1;DVL1;CTNNA1;ABL1;RGS21;APOE;E2F5;NDEL1;UTS2R;MED1;NUDC;GPR37;MMP7;PSPN;FST;NRG1;IGF1;KCTD6;GFAP;SGO2;KAT2A;GDNF;SHKBP1;IL3RA;MAPKAPK5;B9D2;CCL28;CFTR;CDC42SE2 |
| Other Semaphorin Interactions | 2/19 | 9.438 | 35.688 | 0.023 | PLXND1;SEMA3E |
| Scavenging by Class A Receptors | 2/19 | 9.438 | 35.688 | 0.023 | APOE;FTL |
| Synthesis, Secretion, and Deacylation of Ghrelin | 2/19 | 9.438 | 35.688 | 0.023 | BCHE;IGF1 |
| Defensins | 3/49 | 5.246 | 19.827 | 0.023 | DEFB104A;DEFA6;PRSS3 |
| Separation of Sister Chromatids | 6/177 | 2.839 | 10.677 | 0.023 | SGO2;NUDC;UBE2S;PSMB1;B9D2;NDEL1 |
| NOTCH4 Intracellular Domain Regulates Transcription | 2/20 | 8.913 | 32.837 | 0.025 | NOTCH2;KAT2A |
| Epigenetic Regulation by WDR5-containing Histone Modifying Complexes | 5/135 | 3.106 | 11.261 | 0.027 | MED1;KAT2A;PAXIP1;ADIPOQ;ABL1 |
| Proteasome Assembly | 3/52 | 4.924 | 17.847 | 0.027 | POMP;PSMB1;PSMG2 |
| Neddylation | 7/234 | 2.498 | 9.014 | 0.027 | PSMB1;CUL2;COPS7B;MUL1;RNF7;KCTD6;FBXO30 |
| Amplification of Signal From Unattached Kinetochores via a MAD2 Inhibitory Signal | 4/94 | 3.581 | 12.610 | 0.030 | SGO2;NUDC;B9D2;NDEL1 |
| Amplification of Signal From the Kinetochores | 4/94 | 3.581 | 12.610 | 0.030 | SGO2;NUDC;B9D2;NDEL1 |
| RHO GTPases Activate Formins | 5/139 | 3.012 | 10.594 | 0.030 | SGO2;NUDC;DVL1;B9D2;NDEL1 |
| Chaperone Mediated Autophagy | 2/22 | 8.021 | 28.113 | 0.030 | CFTR;GFAP |
| Heparan Sulfate Heparin (HS-GAG) Metabolism | 3/57 | 4.467 | 15.136 | 0.034 | IDUA;GPC2;SGSH |
| Signaling by ERBB4 | 3/58 | 4.385 | 14.666 | 0.035 | NRG1;APOE;GFAP |
| RUNX2 Regulates Osteoblast Differentiation | 2/24 | 7.291 | 24.374 | 0.035 | BGLAP;ABL1 |
| Metabolism of Vitamins and Cofactors | 6/198 | 2.526 | 8.308 | 0.037 | PRSS1;CTRB2;GPC2;APOE;PRSS3;COQ6 |
| NOTCH3 Intracellular Domain Regulates Transcription | 2/25 | 6.974 | 22.788 | 0.038 | KAT2A;PLXND1 |
| Interleukin-1 Signaling | 4/102 | 3.288 | 10.733 | 0.038 | IL1B;PSMB1;TIFA;NFKBIB |
| Epigenetic Regulation of Adipogenesis Genes by MLL3 and MLL4 Complexes | 4/103 | 3.254 | 10.526 | 0.039 | MED1;PAXIP1;ADIPOQ;ABL1 |
| Epigenetic Regulation of Gene Expression by MLL3 and MLL4 Complexes | 4/103 | 3.254 | 10.526 | 0.039 | MED1;PAXIP1;ADIPOQ;ABL1 |
| MLL4 and MLL3 Complexes Regulate Expression of PPARG Targets in Adipogenesis and Hepatic Steatosis | 4/103 | 3.254 | 10.526 | 0.039 | MED1;PAXIP1;ADIPOQ;ABL1 |
| Phase I - Functionalization of Compounds | 4/105 | 3.190 | 10.127 | 0.042 | AOC1;NQO2;CYP2S1;ADH7 |
| Cargo Recognition for Clathrin-Mediated Endocytosis | 4/105 | 3.190 | 10.127 | 0.042 | COPS7B;VAMP4;KIAA0319;CFTR |
| Transcriptional Regulation by RUNX2 | 4/106 | 3.158 | 9.936 | 0.043 | ESRRA;BGLAP;PSMB1;ABL1 |
| Pyroptosis | 2/27 | 6.415 | 20.059 | 0.044 | IL1B;IRF1 |
| Interleukin Receptor SHC Signaling | 2/27 | 6.415 | 20.059 | 0.044 | IL3RA;IL5RA |
| Collagen Degradation | 3/64 | 3.953 | 12.244 | 0.045 | MMP12;MMP7;MMP19 |
| Signaling by NOTCH | 6/209 | 2.388 | 7.330 | 0.046 | NOTCH2;KAT2A;PLXND1;DNER;PSMB1;RFNG |
| RSV-host Interactions | 4/109 | 3.067 | 9.389 | 0.047 | MED1;IFNA14;GPC2;MED15 |
| Notch-HLH Transcription Pathway | 2/28 | 6.168 | 18.879 | 0.047 | NOTCH2;KAT2A |
| Factors Involved in Megakaryocyte Development and Platelet Production | 5/158 | 2.636 | 8.045 | 0.047 | IFNA14;RACGAP1;IRF1;ABL1;GATA2 |
| Myogenesis | 2/29 | 5.939 | 17.802 | 0.049 | ABL1;CTNNA1 |

OR: Odds Ration; p: p-value; *p.FDR by Benjamini–Hochberg adjustment significant.
